# Supplementary material for: Asymmetric tandem conjugate addition and reaction with carbocations on acylimidazole Michael acceptors
Source: publisher site journal article supplement (doi:10.3762/bjoc.19.65), 2023-06-16
Supplement: Additional file 1 [file 1860-5397-19-65-S1.pdf]

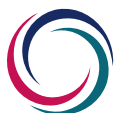

## Supporting Information

for

### **Asymmetric tandem conjugate addition and reaction with carbocations on acylimidazole Michael acceptors**

Brigita Mudráková, Renata Marcia de Figueiredo, Jean-Marc Campagne and Radovan Šebesta

*Beilstein J. Org. Chem.* **2023**, *19*, 881–888. [doi:10.3762/bjoc.19.65](https://doi.org/10.3762/bjoc.19.65)

### **Characterization data for all compounds, computational details, and picture of NMR spectra**

## Table of contents

|                                                                                                                                                                                                   |     |
|---------------------------------------------------------------------------------------------------------------------------------------------------------------------------------------------------|-----|
| 1. General information .....                                                                                                                                                                      | S2  |
| 2. Additional experimental results .....                                                                                                                                                          | S3  |
| 2.1. Optimization of the tandem reaction conditions on acylimidazole derivative.....                                                                                                              | S3  |
| Table S1: Optimization of the tandem reaction conditions on acylimidazole <b>1a</b> with tropylium NTf <sub>2</sub> .....                                                                         | S3  |
| Table S2: Optimization of the tandem reaction conditions on acylimidazole <b>1a</b> , changing the zinc enolate to the ammonium salt, and reaction with tropylium NTf <sub>2</sub> . ....         | S4  |
| Table S3: Optimization of the tandem reaction conditions on acylimidazole <b>1a</b> , transmetallation of zinc enolate to the lithium enolate, and reaction with tropylium NTf <sub>2</sub> ..... | S4  |
| 3. Experimental procedures.....                                                                                                                                                                   | S5  |
| 4. Characterization data.....                                                                                                                                                                     | S9  |
| 5. Copies of NMR, MS, HRMS, and HPLC spectra.....                                                                                                                                                 | S17 |
| 6. CD spectra.....                                                                                                                                                                                | S40 |
| 7. Details of DFT calculations .....                                                                                                                                                              | S40 |
| 8. References.....                                                                                                                                                                                | S62 |

## 1. General information

The reactions were carried out under Ar atmosphere using oven-dried glassware and standard Schlenk techniques. Solvents were dried and purified by standard procedures described in the literature and were freshly distilled prior to their use [1]. CH<sub>2</sub>Cl<sub>2</sub> was dried and distilled over calcium hydride, Et<sub>2</sub>O, MTBE, THF were dried and distilled over Na/benzophenone. Cu(OTf)<sub>2</sub> was commercially available from Sigma-Aldrich. Ligand **L1** was prepared according to a literature procedure [2]. Organozinc reagents were commercially available from Acros. Acylimidazoles [3] and cations [4-6] were synthesized according to the literature. The prepared salts were stored under argon in the dark and in the freezer and were used up to a maximum of two weeks after their syntheses. Reactions were monitored by thin-layer chromatography using Merck silica gel 60 F<sub>254</sub> glass TLC plates. Following the general work-up, products were purified by flash chromatography using Isolera Biotage FSKO-1107-0010 and Std, HC or HP Puriflash columns by Interchim. NMR spectra were measured on a Varian VNMRS 600 spectrometer (600 MHz for <sup>1</sup>H NMR, 150 MHz for <sup>13</sup>C NMR, and 564 MHz for <sup>19</sup>F NMR) and a Bruker Avance NEO 400 MHz (400 MHz for <sup>1</sup>H NMR, 100 MHz for <sup>13</sup>C NMR, and 376 MHz for <sup>19</sup>F NMR). Chemical shifts ( $\delta$ ) in <sup>1</sup>H and <sup>13</sup>C NMR spectra are reported down-fielded to TMS as an internal standard and are given in ppm. <sup>19</sup>F NMR were measured using ref. sample CCl<sub>3</sub>F. Interaction constants (*J*) are given in Hz. The following abbreviations are used to describe the multiplicity of the observed signals - s (singlet), d (doublet), t (triplet), q (quartet) and m (multiplet). High-resolution mass spectrometry was measured by using an Orbitrap Thermo Scientific Velos pro with HESI (heated electrospray ionization). Enantiomeric purities were determined by Chiralcel and Chiralpak (Daicel Chemical Industries Ltd.) and Chiral ART (YMC) columns on HPLC Agilent Technologies 1200 Infinity series using the Chemstation software for LC systems. Circular dichroism spectra were determined by using a Jasco J-815 spectrometer. IR spectra were recorded on an Agilent Technologies Cary 630 FTIR. Melting points were measured on an M-565 Büchi apparatus.

## 2. Additional experimental results

### 2.1. Optimization of the tandem reaction conditions on acylimidazole derivative

**Table S1:** Optimization of the tandem reaction conditions on acylimidazole **1a** with tropylium NTf<sub>2</sub>.

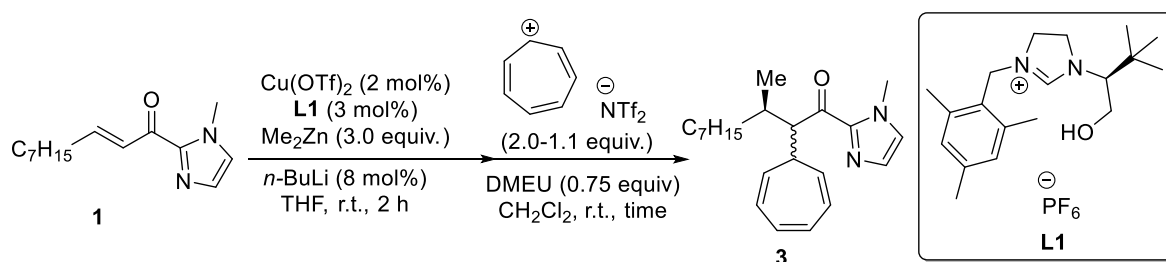

| Entry           | Trop. NTf <sub>2</sub> [equiv.] | Temp. | Time [h] | Yield [%] | dr <sup>d</sup> |
|-----------------|---------------------------------|-------|----------|-----------|-----------------|
| 1               | 1.1                             | r.t.  | 16       | 22        | 2:1             |
| 2               | 1.1                             | 40°C  | 16       | 9         | 5:1             |
| 3               | 1.1                             | r.t.  | 72       | 15        | 1:1             |
| 4               | 1.1                             | r.t.  | 5        | 29        | 4:1             |
| 5               | 1.1                             | r.t.  | 2        | 32        | 4:1             |
| 6               | 1.1                             | r.t.  | 1        | 33        | 4:1             |
| 7               | 2.0                             | r.t.  | 16       | 33        | 2:1             |
| 8 <sup>a</sup>  | 3.3                             | r.t.  | 3        | 93        | 1:1             |
| 9               | 3.3                             | r.t.  | 0.5      | 94        | 1:1             |
| 10 <sup>b</sup> | 3.3                             | r.t.  | 4        | 78        | 1:1             |
| 11              | 3.3                             | 0°C   | 1        | 84        | 1:1             |
| 12 <sup>c</sup> | 3.3                             | r.t.  | 0.5      | 54        | 1:1             |
| 13              | 3.0                             | r.t.  | 0.5      | 61        | 1:1             |
| 14              | 2.5                             | r.t.  | 0.5      | 48        | 1:1             |

<sup>a</sup>3 portions (1.1 equiv of tropylium NTf<sub>2</sub> were added to the reaction mixture every hour until the full conversion).

<sup>b</sup>Syringe pump (rate 0.7 mL/h, volume 1.5 mL of solution, 1.3 mL of CH<sub>2</sub>Cl<sub>2</sub>).

<sup>c</sup>Tropylium tetrafluoroborate was used. <sup>d</sup>The diastereoselectivity of the reaction was determined by <sup>1</sup>H NMR spectroscopy of the crude reaction mixture.

**Table S2:** Optimization of the tandem reaction conditions on acylimidazole **1a**, changing the zinc enolate to the ammonium salt, and reaction with tropylium NTf<sub>2</sub>.

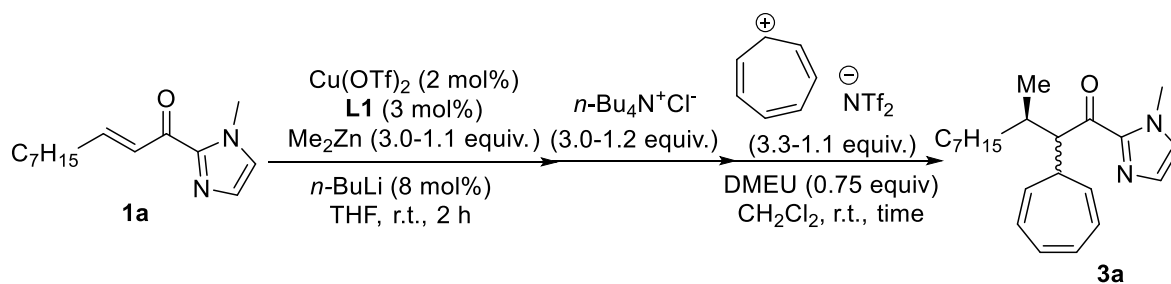

| Entry          | Me <sub>2</sub> Zn [equiv.] | <i>n</i> -Bu <sub>4</sub> N <sup>+</sup> Cl <sup>-</sup> [equiv.] | Trop. NTf <sub>2</sub> [equiv.] | Time [h] | Yield [%] | dr <sup>b</sup> |
|----------------|-----------------------------|-------------------------------------------------------------------|---------------------------------|----------|-----------|-----------------|
| 1              | 3.0                         | 3.0                                                               | 1.1                             | 16       | 20        | 8:1             |
| 2              | 1.5                         | 1.2                                                               | 3.3                             | 0.5      | 44        | 2:1             |
| 3 <sup>a</sup> | 1.1                         | 1.2                                                               | 3.3                             | 1        | 11        | >99:1           |
| 4 <sup>a</sup> | 1.1                         | 1.2                                                               | 3.3                             | 16       | 13        | 3:1             |

<sup>a</sup>The enolate was added to the solution of *n*-Bu<sub>4</sub>N<sup>+</sup>Cl<sup>-</sup> in THF, and then the reaction mixture was stirred 30 min before the addition of tropylium NTf<sub>2</sub>. <sup>b</sup>The diastereoselectivity of the reaction was determined by <sup>1</sup>H NMR spectroscopy of the crude reaction mixture.

**Table S3:** Optimization of the tandem reaction conditions on acylimidazole **1a**, transmetalation of zinc enolate to the lithium enolate, and reaction with tropylium NTf<sub>2</sub>.

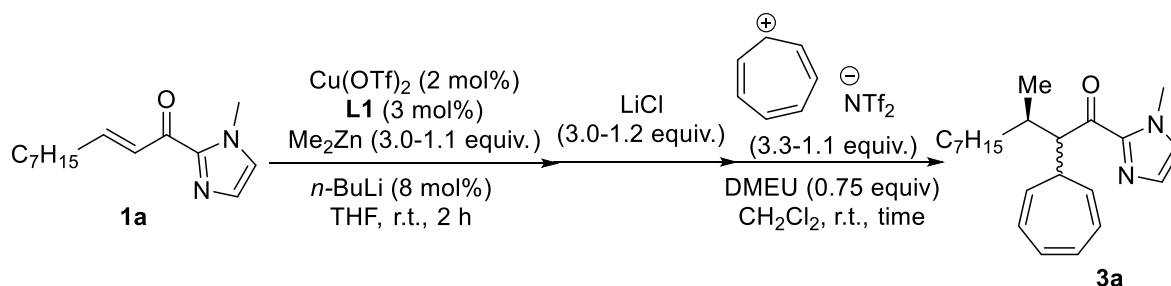

| Entry          | Me <sub>2</sub> Zn [equiv.] | LiCl [equiv.] | Trop. NTf <sub>2</sub> [equiv.] | Time [h] | Yield [%] | dr <sup>b</sup> |
|----------------|-----------------------------|---------------|---------------------------------|----------|-----------|-----------------|
| 1              | 3.0                         | 3.0           | 1.1                             | 16       | 25        | 5:1             |
| 2              | 1.5                         | 1.2           | 3.3                             | 0.5      | 76        | 1:1             |
| 3 <sup>a</sup> | 1.1                         | 1.2           | 3.3                             | 16       | 73        | 1:1             |
| 4 <sup>a</sup> | 1.1                         | 1.2           | 3.3                             | 0.5      | 56        | 1:1             |

<sup>a</sup>The enolate was added to the solution of LiCl in THF, and then the reaction mixture was stirred 30 min before the addition of tropylium NTf<sub>2</sub>. <sup>b</sup>The diastereoselectivity of the reaction was determined by <sup>1</sup>H NMR spectroscopy of the crude reaction mixture.

### 3. Experimental procedures

#### Synthesis of the starting acylimidazoles

##### Method A

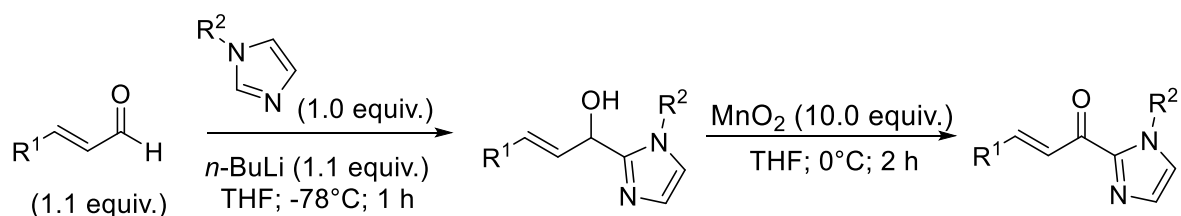

##### Synthesis of alcohols:

In a flame-dried round-bottomed flask, a 1.6 M solution of *n*-BuLi in hexane (8.38 mL, 13.40 mmol, 1.1 equiv) was added dropwise at  $-78^\circ C$  to a solution of NMI (0.97 mL, 12.20 mmol, 1.0 equiv) in anhydrous THF (24.4 mL). The resulting solution was stirred for 10 min at  $-78^\circ C$ , then allowed to warm to rt and stirred for additional 10 min. Afterwards, the reaction was cooled to  $-78^\circ C$  before the addition of the aldehyde (13.40 mmol, 1.1 equiv). The mixture was stirred for 1 h at  $-78^\circ C$ , then  $H_2O$  (10 mL) was added to quench the reaction. The organic phase was washed with a sat. aq. solution of  $NaHCO_3$  (15 mL) and brine (15 mL). Then, the organic phase was dried over  $MgSO_4$  and concentrated under vacuum. The desired alcohol was purified by column chromatography on  $SiO_2$  ( $CH_2Cl_2/MeOH$  96:4).

##### Synthesis of acylimidazoles:

In a flame-dried round-bottomed flask, the alcohol (10.30 mmol, 1.0 equiv) was taken up in anhydrous THF (103 mL;  $c = 0.1$  M).  $MnO_2$  (8.95 g, 103.00 mmol, 10.0 equiv) was added in one portion to the solution at  $0^\circ C$ . The mixture was stirred for 2 h and monitored by TLC. After completion, the reaction mixture was allowed to warm to rt, filtered through a pad of celite, washed with EtOAc (150 mL), and the solvent was evaporated under reduced pressure. The product was purified by column chromatography on  $SiO_2$  (pentane/EtOAc 4:6).

## Method B

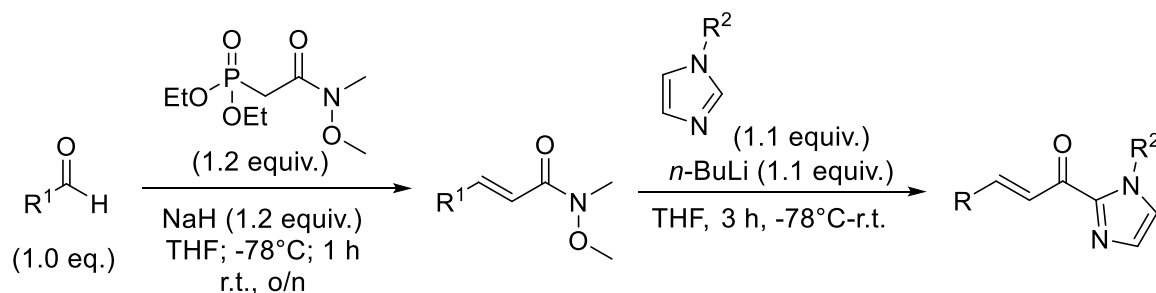

### Synthesis of Weinreb amides:

In a flame-dried round-bottomed flask, diethyl 2-(methoxy(methyl)amino)-2-oxoethylphosphonate (2.87 g, 12.00 mmol, 1.2 equiv) was dissolved in anhydrous THF (25 mL) and sodium hydride (powder, 95%, 288.0 mg, 12.00 mmol, 1.2 equiv) was added portion-wise at rt until the bubbling has stopped. The mixture was then cooled to -78 °C before the addition of the aldehyde (10.00 mmol, 1.0 equiv) dissolved in anhydrous THF (5.8 mL). The reaction medium was stirred at -78 °C for 1 h, then allowed to warm to rt and stirred overnight. Then, water was added to quench the reaction. The layers were separated and the organic phase was washed with a sat. aq. solution of NaHCO<sub>3</sub> (15 mL), brine (15 mL), dried over MgSO<sub>4</sub>, and concentrated under vacuum. The residue was purified by column chromatography on SiO<sub>2</sub> (pentane/EtOAc 4:6).

### Synthesis of acylimidazoles:

In a flame-dried round-bottomed flask, a 1.6 M solution of *n*-BuLi in hexane (3.29 mL, 5.26 mmol, 1.1 equiv) was added dropwise at -78 °C to a solution of 1-methyl-1*H*-imidazole (0.41 mL, 5.26 mmol, 1.1 equiv) in anhydrous THF (14.5 mL). The resulting mixture was stirred for 20 min at -78 °C, and then was allowed to warm to rt and stirred for additional 10 min. The reaction mixture was cooled to -78 °C before the addition of the Weinreb amide (4.78 mmol, 1.0 equiv) in anhydrous THF (5.3 mL). The mixture was stirred for 30 min at -78 °C, then for 3 h at rt followed by the addition of a sat. aq. solution of NH<sub>4</sub>Cl (15 mL) in order to quench the reaction. EtOAc (15 mL) was added and the organic phase was separated and further washed with a sat. aq. solution of NaHCO<sub>3</sub> (15 mL) and brine (15 mL). The organic layer was dried over MgSO<sub>4</sub> and evaporated. Purification was performed by column chromatography on SiO<sub>2</sub> (pentane/EtOAc 4:6).

## Preparations of the electrophilic reactants for one-pot reactions

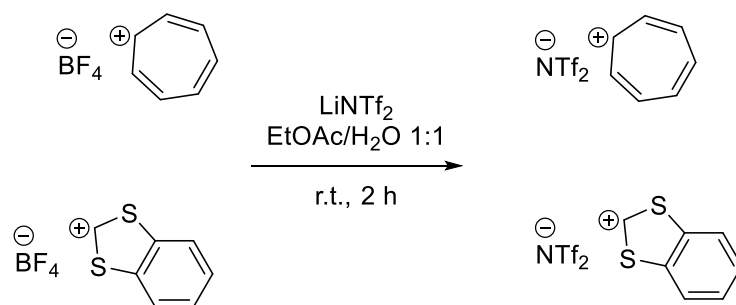

Tropylium BF<sub>4</sub> (1.0 g, 5.60 mmol, 1.0 equiv) or 1,3-benzodithiol-2-ylum BF<sub>4</sub> (1.34 g, 5.60 mmol, 1.0 equiv) and LiNTf<sub>2</sub> (1.61 g, 5.60 mmol, 1.0 equiv) were dissolved in a mixture of EtOAc (14 mL) and H<sub>2</sub>O (14 mL) and stirred at room temperature for 2 h. Next, the phases were separated, and the organic phase was dried over anhydr. MgSO<sub>4</sub>, filtered, and the solvent was evaporated under reduced pressure. The solids were dried under high vacuum.

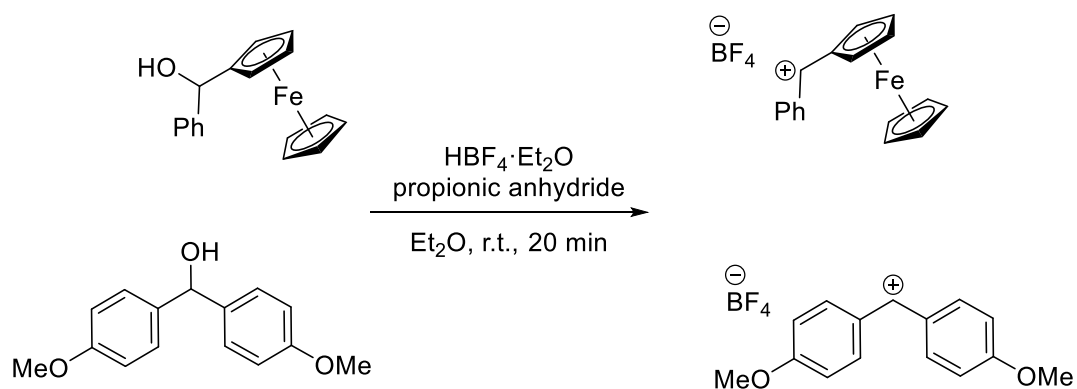

To a solution of 4,4'-dimethoxybenzhydrol (0.50 g, 2.00 mmol, 1.0 equiv) or (hydroxyphenylmethyl)ferrocene (0.56 g, 2.00 mmol, 1.0 equiv) in dry Et<sub>2</sub>O (6 mL) was added propionic anhydride (1.3 mL, 10.2 mmol, 10.0 equiv). Next, HBF<sub>4</sub>·Et<sub>2</sub>O (0.58 mL, 4.10 mmol, 2.0 equiv) was dropwise added, and the resulting mixture was stirred for 20 min at room temperature. Then, the reaction mixture was cooled to 0 °C and stirred for 10 min. The resulting precipitate was filtered and washed with cold anhydrous Et<sub>2</sub>O (3 × 10 mL) and pentane (3 × 10 mL). The solids were dried under high vacuum.



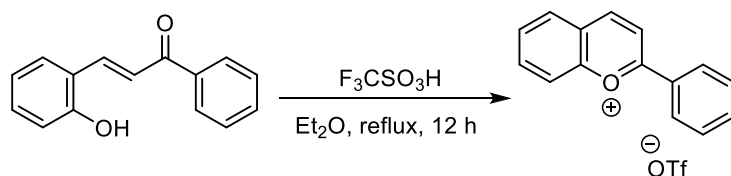

To a suspension of (*E*)-3-(2-hydroxyphenyl)-1-phenylprop-2-en-1-one (1.5 g, 6.69 mmol, 1.0 equiv) in Et<sub>2</sub>O (4 mL) was added dropwise F<sub>3</sub>CSO<sub>3</sub>H (0.59 μL mL, 22.55 mmol, 3.4 equiv). The reaction mixture was refluxed overnight. Then, the mixture was filtered, the precipitate was washed with cold anhydrous Et<sub>2</sub>O (3 × 5 mL), and the solid was dried under high vacuum.

### General procedure for the one-pot conjugate addition of organozinc reagents to acylimidazole followed by trapping with carbocations

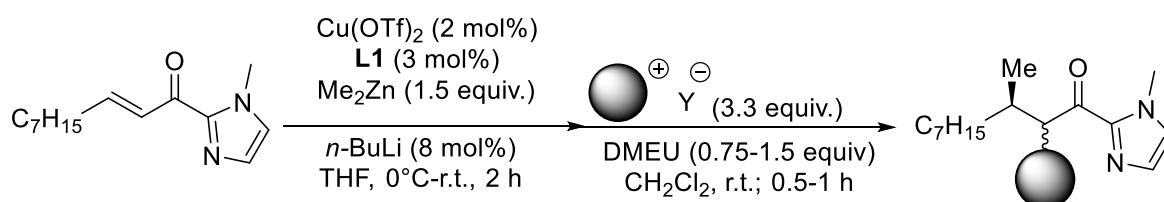

In a flame-dried Schlenk flask flushed with Ar, the copper source (1.81 mg, 0.005 mmol, 2 mol %) and chiral NHC ligand (3.36 mg, 0.0075 mmol, 3 mol %) were dissolved in freshly distilled anhydrous THF (1 mL) and the mixture was stirred for 10 min at rt. The reaction mixture was cooled to 0 °C, and then a 1.6 M solution of *n*-BuLi in hexane (12.5 μL, 0.02 mmol, 8 mol %) was added dropwise and the mixture was stirred for 10 min. Subsequently, a 1.2 M solution of dimethylzinc reagent in toluene (0.31 mL, 0.38 mmol, 1.5 equiv) was added dropwise to the solution and the resulting mixture was also stirred for 10 min. The acylimidazole (0.25 mmol, 1.0 equiv) in anhydrous THF (0.5 mL) was added dropwise to the mixture. The reaction mixture was stirred for 2 h, while it was slowly allowed to warm to rt. Then, the electrophile in anhydrous CH<sub>2</sub>Cl<sub>2</sub> (1 mL) together with DMEU (20.2–40.4 μL, 75–150 mol %, to achieve homogeneity of the reaction mixture) were added to the reaction mixture and stirring at rt was continued for 0.5–1 h. The reaction was quenched with 1 M HCl (6 mL), and EtOAc (6 mL) was added. Then, the organic phase was washed with a sat. aq. solution of NaHCO<sub>3</sub> (6 mL), with brine (6 mL), dried over MgSO<sub>4</sub>, and concentrated under vacuum. The residue was purified by flash chromatography on SiO<sub>2</sub> (hexane/EtOAc 15:1).

## General procedure for the racemic one-pot conjugate addition of organozinc reagents to acylimidazole followed by trapping with carbocations

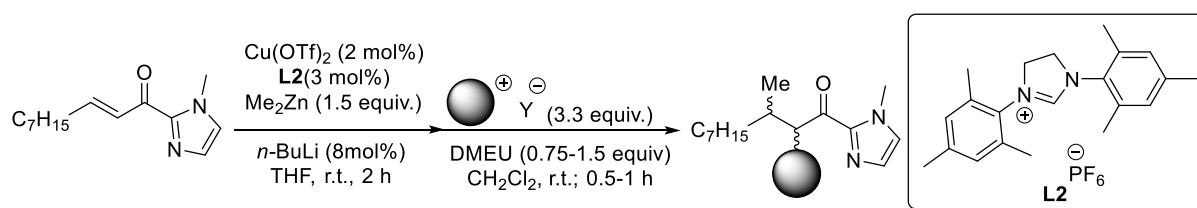

In a flame-dried Schlenk flask flushed with Ar, the copper source (1.81 mg, 0.005 mmol, 2 mol %) and achiral NHC ligand (3.60 mg, 0.0075 mmol, 3 mol %) were dissolved in freshly distilled anhydrous THF (1 mL). The mixture was stirred for 10 min at rt. Then, a 1.6 M solution of *n*-BuLi in hexane (12.5  $\mu$ L, 0.02 mmol, 8 mol %) was added dropwise and the mixture was stirred also for 10 min. Subsequently, a 1.2 M solution of the dimethylzinc reagent in toluene (0.31 mL, 0.38 mmol, 1.5 equiv) was added dropwise to the solution. The resulting mixture was stirred at rt for 10 min. The acylimidazole (0.25 mmol, 1.0 equiv) in anhydrous THF (0.5 mL) was added dropwise and the reaction mixture was stirred at rt for 2 h. Next, the electrophile in anhydrous CH<sub>2</sub>Cl<sub>2</sub> (1 mL) together with DMEU (20.2–40.4  $\mu$ L, 75–150 mol %, to achieve homogeneity of the reaction mixture) were added to the reaction mixture and stirring at room temperature was continued 0.5–1 h. The reaction was quenched with 1 M HCl (6 mL), and EtOAc (6 mL) was added. Then, the organic phase washed with a sat. aq. solution of NaHCO<sub>3</sub> (6 mL), with brine (6 mL), dried over MgSO<sub>4</sub>, and concentrated under vacuum. The residue was purified by flash chromatography on SiO<sub>2</sub> (hexane/EtOAc 15:1).

## 4. Characterization data

(3*R*)-2-(Cyclohepta-2,4,6-trien-1-yl)-3-methyl-1-(1-methyl-1*H*-imidazol-2-yl)decan-1-one

(3a)

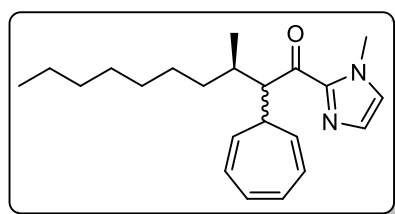

Orange oil, yield: 90% (76.6 mg), d. r. 1:1. purified by silica gel flash chromatography (hexane/EtOAc 8:1). The diastereomers were not separated. <sup>1</sup>H NMR (400 MHz, CDCl<sub>3</sub>):  $\delta$  7.17 (s, 1H), 7.16 (s, 1H), 7.03 (s, 2H), 6.68 – 6.61 (m, 4H), 6.23 – 6.05 (m, 4H), 5.36 (dd, *J* = 9.3, 5.9 Hz, 1H), 5.31 – 5.23 (m, 3H), 4.46 (dd, *J* = 10.0, 5.6 Hz, 1H), 4.38 (dd, *J* = 8.7, 6.9 Hz, 1H), 3.99 (s, 3H), 3.98 (s, 3H), 2.29 – 2.13 (m, 2H), 2.12 – 2.00 (m, 2H), 1.51 – 1.03 (m, 24H), 0.91 (d, *J* = 6.9 Hz, 3H), 0.88 – 0.82 (m, 9H) ppm. <sup>13</sup>C NMR (151 MHz, CDCl<sub>3</sub>):  $\delta$  196.6, 196.4, 145.0, 144.8, 130.9, 130.8, 130.5, 130.5, 129.1, 129.0, 127.2 (2 C), 124.7 (2 C), 124.6, 124.6, 123.8, 123.5, 123.0, 122.4, 52.2, 51.2, 39.8, 39.6,

36.4, 36.4 (2 C), 36.4, 35.1, 34.5, 34.4, 33.7, 31.8, 29.6, 29.2, 29.2, 27.3, 27.2, 22.6 (2 C), 17.5, 15.7, 14.1 (2 C) ppm. **IR** (ATR): 3106, 3010, 2954, 2924, 2853, 2068, 1988, 1662, 1457, 1406, 1364, 1156, 913, 768, 744, 709  $\text{cm}^{-1}$ . **HRMS** (HESI):  $m/z$   $[\text{M}+\text{Na}]^+$  calcd for  $\text{C}_{22}\text{H}_{32}\text{N}_2\text{ONa}$ : 363.2407, found: 363.2407. **HPLC**: Chiralpak IC, hexane/*i*-PrOH = 90:10, 1.0 mL/min, 260 nm,  $t_{\text{R}}(\text{minor}) = 5.25$  min,  $t_{\text{R}}(\text{major}) = 5.52$  min.

(3*R*)-2-(Benzo[*d*][1,3]dithiol-2-yl)-3-methyl-1-(1-methyl-1*H*-imidazol-2-yl)decan-1-one (**4**)

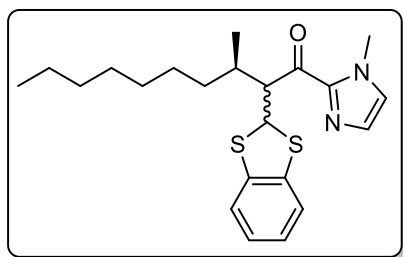

Yellow oil, yield: 83% (84.0 mg), diastereoselective ratio 1:1, purified by silica gel flash chromatography (hexane/EtOAc 15:1). The diastereomers were separated by flash chromatography. **<sup>1</sup>H NMR (4-dia<sub>1</sub>)** (400 MHz,  $\text{CDCl}_3$ ):  $\delta$  7.18 – 7.15 (m, 1H), 7.11 – 7.08 (m, 2H), 7.01 (s, 1H), 6.99 – 6.95 (m, 2H), 5.37 (d,  $J = 10.6$  Hz, 1H), 4.55 (dd,  $J = 10.6, 4.4$  Hz, 1H), 3.95 (s, 3H), 2.28 – 2.19 (m, 1H), 1.53 – 1.41 (m, 1H), 1.37 – 1.16 (m, 10H), 1.03 – 0.93 (m, 1H), 0.90 (d,  $J = 6.9$  Hz, 3H), 0.85 (t,  $J = 6.9$  Hz, 3H) ppm. **<sup>1</sup>H NMR (4-dia<sub>2</sub>)** (400 MHz,  $\text{CDCl}_3$ )  $\delta$  7.15 – 7.08 (m, 3H), 7.00 (s, 1H), 6.98 – 6.94 (m, 2H), 5.41 (d,  $J = 10.0$  Hz, 1H), 4.51 (dd,  $J = 10.0, 5.0$  Hz, 1H), 3.90 (s, 3H), 2.28 – 2.16 (m, 1H), 1.57 – 1.45 (m, 1H), 1.42 – 1.16 (m, 10H), 1.15 – 1.04 (m, 1H), 0.95 (d,  $J = 7.0$  Hz, 3H), 0.87 (t,  $J = 6.8$  Hz, 3H) ppm. **<sup>13</sup>C NMR (4-dia<sub>1</sub>)** (151 MHz,  $\text{CDCl}_3$ ):  $\delta$  193.59, 144.17, 137.59, 136.87, 129.25, 127.26, 125.48, 125.37, 122.47, 122.35, 56.91, 54.42, 36.29, 35.33, 34.82, 31.81, 29.50, 29.19, 27.31, 22.62, 15.15, 14.08 ppm. **<sup>13</sup>C NMR (4-dia<sub>2</sub>)** (151 MHz,  $\text{CDCl}_3$ )  $\delta$  193.41, 144.04, 137.70, 137.08, 129.23, 127.24, 125.46, 125.34, 122.44, 122.27, 57.56, 54.15, 36.25, 34.61, 32.56, 31.83, 29.60, 29.26, 27.48, 22.64, 17.95, 14.10 ppm. **IR (4-dia<sub>1</sub>)** (ATR): 3110, 2922, 2852, 2111, 1659, 1444, 1406, 1117, 911, 739, 687  $\text{cm}^{-1}$ . **IR (4-dia<sub>2</sub>)** (ATR): 3105, 2923, 2853, 1660, 1444, 1406, 1117, 987, 913, 739  $\text{cm}^{-1}$ . **HRMS (HESI, 4-dia<sub>1</sub>)**:  $m/z$   $[\text{M}+\text{Na}]^+$  calcd for  $\text{C}_{22}\text{H}_{30}\text{N}_2\text{S}_2\text{ONa}$ : 425.1692, found: 425.1692. **HRMS (HESI, 4-dia<sub>2</sub>)**:  $m/z$   $[\text{M}+\text{Na}]^+$  calcd for  $\text{C}_{22}\text{H}_{30}\text{N}_2\text{S}_2\text{ONa}$ : 425.1692, found: 425.1692. **HPLC (4-dia<sub>1</sub>)**: Chiralpak IC, hexane/*i*-PrOH = 95:5, 1.0 mL/min, 260 nm,  $t_{\text{R}}(\text{major}) = 6.491$  min,  $t_{\text{R}}(\text{minor}) = 9.242$  min. **HPLC (4-dia<sub>2</sub>)**: Chiralpak IC, hexane/*i*-PrOH = 95:5, 1.0 mL/min, 260 nm,  $t_{\text{R}}(\text{minor}) = 6.482$  min,  $t_{\text{R}}(\text{major}) = 8.269$  min.

(3*R*)-3-Methyl-1-(1-methyl-1*H*-imidazol-2-yl)-2-(phenyl(ferrocenyl)methyl)decan-1-one (**5**)

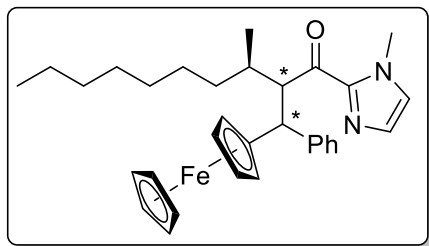

Orange oil, yield: 44% (57.0 mg), diastereoselective ratio 1:1:1:1, purified by silica gel flash chromatography (hexane/EtOAc 15:1). The diastereomers were separated by preparative thin-layer chromatography (SiO<sub>2</sub>, hexane/EtOAc 4:1). **<sup>1</sup>H NMR (5-diast1,2)** (400 MHz, CDCl<sub>3</sub>): δ 7.48 (d, *J* = 7.2 Hz, 2H), 7.39 (t, *J* = 7.5 Hz, 4H), 7.30 – 7.27 (m, 1H), 7.18 (t, *J* = 7.6 Hz, 2H), 7.08 (d, *J* = 7.3 Hz, 1H), 7.03 (d, *J* = 1.4 Hz, 2H), 6.87 (s, 1H), 6.78 (s, 1H), 4.64 (dd, *J* = 11.7, 3.8 Hz, 1H), 4.49 (dd, *J* = 11.8, 2.9 Hz, 1H), 4.19 – 4.17 (m, 1H), 4.14 – 4.10 (m, 2H), 4.07 – 4.05 (m, 1H), 4.01 (d, *J* = 11.7 Hz, 1H), 3.96 – 3.91 (m, 3H), 3.86 (s, 3H), 3.82 – 3.77 (m, 2H), 3.67 (s, 5H), 3.66 (s, 5H), 3.61 (s, 3H), 1.66 – 1.59 (m, *J* = 9.5, 6.3 Hz, 1H), 1.49 – 1.43 (m, 1H), 1.35 – 1.06 (m, 24H), 0.97 – 0.91 (m, 6H), 0.87 – 0.79 (m, 6H) ppm. **<sup>1</sup>H NMR (5-diast3,4)** (400 MHz, CDCl<sub>3</sub>) δ 7.45 (d, *J* = 7.3 Hz, 2H), 7.38 (dd, *J* = 16.3, 8.1 Hz, 4H), 7.28 – 7.23 (m, 1H), 7.18 (t, *J* = 7.6 Hz, 2H), 7.08 (d, *J* = 7.3 Hz, 1H), 7.05 (d, *J* = 9.2 Hz, 2H), 6.88 (s, 1H), 6.78 (s, 1H), 4.60 (dd, *J* = 11.6, 4.0 Hz, 1H), 4.47 (dd, *J* = 11.8, 3.4 Hz, 1H), 4.16 – 4.10 (m, 3H), 4.09 – 4.03 (m, 2H), 4.01 – 3.96 (m, 2H), 3.96 – 3.92 (m, 1H), 3.87 (s, 3H), 3.81 (d, *J* = 6.2 Hz, 2H), 3.68 (s, 5H), 3.65 (s, 5H), 3.61 (s, 3H), 1.79 – 1.66 (m, 2H), 1.61 – 1.53 (m, 1H), 1.50 – 1.41 (m, 1H), 1.34 – 0.96 (m, 22H), 0.88 (m, 6H), 0.81 (d, *J* = 7.0 Hz, 3H), 0.77 (d, *J* = 7.0 Hz, 3H) ppm. **<sup>13</sup>C NMR (5-diast1,2)** (101 MHz, CDCl<sub>3</sub>): δ 196.1, 195.6, 145.1, 145.0, 144.1 (2 C), 143.5 (2 C), 129.1, 128.8, 128.6, 128.5, 128.1 (2 C), 127.5 (2 C), 126.5, 126.4, 126.2, 126.0, 91.9 (2 C), 70.0, 69.5, 68.5 (5 C), 68.4 (5 C), 68.2, 67.5, 67.1, 66.6, 66.0, 65.8, 55.5 (2 C), 46.7, 46.3, 36.2, 35.9, 35.8, 35.1, 34.2, 31.9, 31.8, 29.7, 29.5, 29.5, 29.2, 29.1, 27.6, 27.5, 22.6, 22.6, 14.9, 14.4, 14.1, 14.1 ppm. **<sup>13</sup>C NMR (5-diast3,4)** (101 MHz, CDCl<sub>3</sub>): δ 196.2, 195.7, 145.1, 145.0, 144.0 (2 C), 143.6 (2 C), 129.1, 128.8, 128.7, 128.5, 128.1 (2 C), 127.5 (2 C), 126.6, 126.4, 126.3, 126.1, 91.8 (2 C), 70.2, 69.6, 68.5 (10 C), 68.3, 67.6, 67.2, 66.6, 66.0, 65.9, 58.1, 57.3 (2 C), 46.4, 45.9, 36.2, 35.9, 34.9, 34.3, 31.9, 31.9, 31.2, 30.8, 30.0, 29.6, 29.4, 29.2, 28.0, 27.8, 22.7, 22.7, 19.0, 18.7, 14.2 ppm. **IR (5-diast1,2)** (ATR): 2954, 2922, 2852, 1664, 1408, 1380, 1106, 1026, 1000, 913, 808, 701, 482 cm<sup>-1</sup>. **IR (5-diast3,4)** (ATR): 2953, 2921, 2851, 1664, 1408, 1287, 1154, 1106, 999, 984, 915, 805, 703, 480 cm<sup>-1</sup>. **HRMS (5-diast1,2)** (HESI): *m/z* [M+Na]<sup>+</sup> calcd for C<sub>32</sub>H<sub>40</sub>FeN<sub>2</sub>ONa: 547.2382, found: 574.2382. **HRMS (5-diast3,4)** (HESI): *m/z* [M+Na]<sup>+</sup> calcd for C<sub>32</sub>H<sub>40</sub>FeN<sub>2</sub>ONa: 547.2382, found: 574.2382. **HPLC (5-diast1)**: Chiral ART Amylose SA, hexane/*i*-PrOH = 90:10, 1.0 mL/min, 210 nm, *t<sub>R</sub>*(major) = 4.319 min, *t<sub>R</sub>*(minor) = 4.754 min. **HPLC (4-diast2)**: Chiral ART Amylose SA, hexane/*i*-PrOH = 90:10, 1.0 mL/min, 210 nm, *t<sub>R</sub>*(major) = 4.572 min, *t<sub>R</sub>*(minor) = 4.994 min.

(3*R*)-3-Methyl-1-(1-methyl-1*H*-imidazol-2-yl)-2-(2-phenyl-4*H*-chromen-4-yl)decan-1-one (6)

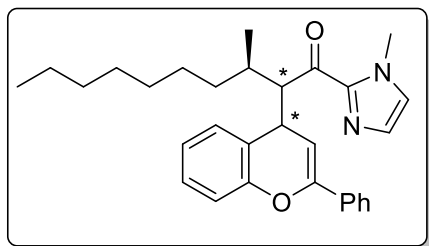

Yellow oil, yield: 22% (25.0 mg), d. r. 1:1:1. The reaction mixture was purified by silica gel flash chromatography (hexane/EtOAc 15:1). The diastereomers were separated by preparative thin-layer chromatography (SiO<sub>2</sub>, hexane/EtOAc 5:1). **<sup>1</sup>H NMR (6-diast1,2)** (400 MHz, CDCl<sub>3</sub>):

$\delta$  7.65 – 7.57 (m, 4H), 7.39 – 7.30 (m, 7H), 7.21 – 7.13 (m,  $J = 9.2, 1.4$  Hz, 3H), 7.10 (d,  $J = 8.9$  Hz, 2H), 7.02 (dt,  $J = 7.3, 6.3$  Hz, 4H), 6.92 (d,  $J = 3.4$  Hz, 2H), 5.68 (d,  $J = 5.1$  Hz, 1H), 5.64 (d,  $J = 5.0$  Hz, 1H), 4.40 – 4.26 (m, 2H), 4.10 (dd,  $J = 10.0, 5.1$  Hz, 2H), 3.94 (s, 3H), 3.92 (s, 3H), 2.25 – 2.14 (m, 2H), 1.56 – 1.44 (m, 2H), 1.40 – 1.31 (m,  $J = 10.2$  Hz, 2H), 0.94 (d,  $J = 2.6$  Hz, 20H), 0.92 (d,  $J = 2.6$  Hz, 6H), 0.86 – 0.81 (m, 6H) ppm. **<sup>1</sup>H NMR (6-diast3)** (400 MHz, CDCl<sub>3</sub>):  $\delta$  7.71 – 7.66 (m, 2H), 7.41 – 7.31 (m, 3H), 7.26 – 7.23 (m, 1H), 6.98 – 6.93 (m, 1H), 6.90 – 6.78 (m, 3H), 6.70 (s, 1H), 5.57 (d,  $J = 5.0$  Hz, 1H), 4.24 (dd,  $J = 10.3, 5.1$  Hz, 1H), 4.17 (dd,  $J = 17.7, 12.6$  Hz, 1H), 3.66 (s, 3H), 2.28 – 2.13 (m, 1H), 1.61 – 1.53 (m, 1H), 1.43 (dd,  $J = 8.6, 5.5$  Hz, 1H), 1.28 – 1.13 (m, 10H), 0.84 (t,  $J = 6.9$  Hz, 3H) ppm. **<sup>13</sup>C NMR (6-diast1,2)** (101 MHz, CDCl<sub>3</sub>):  $\delta$  195.9, 195.7, 152.3, 152.3, 149.7, 149.5, 144.4, 144.3, 134.3, 134.2, 129.0, 128.8, 128.7, 128.4, 128.2 (2 C), 128.2 (2 C), 127.6, 127.5, 127.0, 127.0, 124.8 (2 C), 124.7 (2 C), 123.2, 123.2, 116.4, 116.4, 98.8, 98.6, 58.7, 57.5, 36.2, 36.2, 35.5, 35.3, 34.8, 34.3, 32.7, 32.5, 31.8, 31.8, 30.9, 29.8, 29.7, 29.3, 29.2, 27.0, 26.4, 22.6 (2 C), 17.5, 17.2, 14.1 (2 C) ppm. **<sup>13</sup>C NMR (6-diast3)** (101 MHz, CDCl<sub>3</sub>):  $\delta$  195.1, 151.8, 150.2, 145.1, 134.6, 129.5, 128.5, 128.4, 128.3 (2 C), 127.3, 125.9, 125.0 (2 C), 123.0, 121.7, 115.6, 97.3, 59.5, 35.8, 35.6, 35.2, 31.8, 31.8, 29.8, 29.3, 27.1, 22.6, 17.0, 14.1 ppm. **IR (6-diast1,2)** (ATR): 2555, 2923, 2853, 1665, 1490, 1457, 1403, 1230, 1005, 912, 757, 732, 695 cm<sup>-1</sup>. **IR (6-diast3)** (ATR): 2954, 2923, 2853, 1665, 1487, 1457, 1407, 1232, 1003, 752, 692 cm<sup>-1</sup>. **HRMS (6-diast1,2)** (HESI):  $m/z$  [M+Na]<sup>+</sup> calcd for C<sub>30</sub>H<sub>36</sub>N<sub>2</sub>O<sub>2</sub>Na: 479.2669, found: 479.2669. **HRMS (6-diast3)** (HESI):  $m/z$  [M+Na]<sup>+</sup> calcd for C<sub>30</sub>H<sub>36</sub>N<sub>2</sub>O<sub>2</sub>Na: 479.2669, found: 479.2669.

(3*R*)-2-(Cyclohepta-2,4,6-trien-1-yl)-3-methyl-1-(1-methyl-1*H*-imidazol-2-yl)pentan-1-one

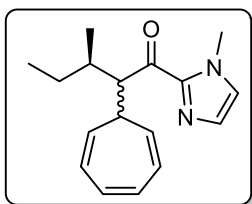

(3b)

Orange oil, yield: 68% (46.0 mg), d.r. 2:1, purified by silica gel flash chromatography (hexane/EtOAc 10:1 – 1:1). The diastereomers were not separated. **<sup>1</sup>H NMR** (400 MHz, CDCl<sub>3</sub>):  $\delta$  7.18 – 7.17 (m, 2H), 7.04 (bs, 2H), 6.67 – 6.64 (m, 4H), 6.22 – 6.08 (m, 4H), 5.38 (dd,  $J = 9.4, 5.9$  Hz, 1H), 5.31 – 5.23 (m, 3H), 4.47 (dd,  $J = 10.0, 5.7$  Hz, 1H), 4.39 (dd,  $J = 8.5, 7.1$  Hz, 1H), 4.00 (s, 3H), 4.00 (s, 3H),

2.19 – 2.01 (m, 4H), 1.59 – 1.43 (m, 2H), 1.22 – 0.97 (m, 2H), 0.92 – 0.86 (m, 12H) ppm. **<sup>13</sup>C NMR** (101 MHz, CDCl<sub>3</sub>): δ 196.8, 196.5, 145.0, 144.8, 131.0, 130.9, 130.6, 130.6, 129.2, 129.1, 127.3 (2 C), 124.8, 124.8, 124.7, 124.6, 123.8, 123.5, 123.1, 123.0, 52.0, 51.1, 39.9, 39.7, 36.5, 36.4, 36.3, 36.2, 27.9, 26.7, 16.9, 15.2, 12.0, 11.9 ppm. **HRMS** (HESI): *m/z* [M+Na]<sup>+</sup> calcd for C<sub>17</sub>H<sub>22</sub>N<sub>2</sub>ONa: 293.1624, found: 293.1624. **HPLC**: Chiralpak IC, hexane/*i*-PrOH = 90:10, 1.0 mL/min, 254.4 nm, *t<sub>R</sub>*(minor) = 5.45 min, *t<sub>R</sub>*(major) = 5.69 min.

(3*R*)-2-(Cyclohepta-2,4,6-trien-1-yl)-3-cyclohexyl-1-(1-methyl-1*H*-imidazol-2-yl)butan-1-one

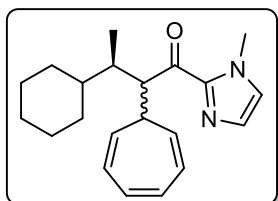

(3c)

Orange oil, yield: 58% (47.0 mg), d. r. 1:1, purified by silica gel flash chromatography (hexane/EtOAc 10:1 – 1:1). The diastereomers were not separated. **<sup>1</sup>H NMR** (400 MHz, CDCl<sub>3</sub>): δ 7.18 – 7.17 (m, 2H), 7.04 (bs, 2H), 6.68 – 6.61 (m, 4H), 6.20 – 6.08 (m, 4H), 5.57 (dd, *J* = 9.4, 5.9 Hz, 1H), 5.36 (dd, *J* = 9.3, 5.9 Hz, 1H), 5.25 – 5.20 (m, 2H), 4.56 (dd, *J* = 9.1, 6.5 Hz, 1H), 4.49 (dd, *J* = 9.1, 6.7 Hz, 1H), 4.01 (s, 3H), 3.99 (s, 3H), 2.21 – 2.11 (m, 1H), 2.09 – 2.00 (m, 2H), 1.99 – 1.93 (m, 1H), 1.87 – 1.75 (m, 2H), 1.73 – 1.48 (m, 10H), 1.17 – 0.88 (m, 10H). 0.83 (d, *J* = 7.1 Hz, 3H), 0.79 (d, *J* = 7.0 Hz, 3H) ppm. **<sup>13</sup>C NMR** (101 MHz, CDCl<sub>3</sub>): δ 197.5, 197.0, 145.1, 144.7, 131.0, 130.8, 130.5, 130.4, 129.2, 129.1, 127.2 (2 C), 124.8, 124.8, 124.6, 124.5, 123.6, 123.4, 123.1, 123.1, 49.2, 49.1, 41.0 (2 C), 40.2, 40.1, 40.0, 39.9, 36.4, 36.4, 32.2, 32.1, 28.7, 27.4, 26.9, 26.8, 26.7 (2 C), 26.6, 26.5, 12.6, 12.4. **HRMS** (HESI): *m/z* [M+Na]<sup>+</sup> calcd for C<sub>21</sub>H<sub>28</sub>N<sub>2</sub>ONa: 347.2094, found: 347.2094. **HPLC**: Chiralpak IC, hexane/*i*-PrOH = 90:10, 1.0 mL/min, 254.4 nm, *t<sub>R</sub>*(major) = 4.82 min, *t<sub>R</sub>*(minor) = 5.46 min.

(3*S*)-2-(Cyclohepta-2,4,6-trien-1-yl)-1-(1-methyl-1*H*-imidazol-2-yl)-3-phenylbutan-1-one

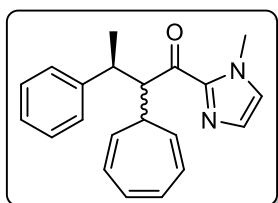

(3d)

Colorless oil, yield: 21% (17.0 mg), d. r. 3:1, purified by silica gel flash chromatography (hexane/EtOAc 15:1 – 4:1). The diastereomers were not separated. **<sup>1</sup>H NMR** (400 MHz, CDCl<sub>3</sub>): δ 7.26 – 7.04 (m, 12H), 7.02 (bs, 1H), 6.87 (bs, 1H), 6.69 – 6.66 (m, 2H), 6.51 – 6.49 (m, 2H), 6.22 – 6.13 (m, 2H), 6.09 (dd, *J* = 9.3, 4.8 Hz, 1H), 5.96 (dd, *J* = 9.2, 4.8 Hz, 1H), 5.59 (dd, *J* = 9.3, 5.9 Hz, 1H), 5.49 (dd, *J* = 9.4, 5.8 Hz, 1H), 5.29 (dd, *J* = 9.0, 6.2 Hz, 1H), 5.08 (dd, *J* = 9.3, 6.0 Hz, 1H), 4.74 – 4.67 (m, 2H), 4.00 (s, 3H), 3.71 (s, 3H), 3.50 – 3.41 (m, 2H), 2.12 – 2.08 (m, 1H), 1.76 – 1.71 (m, 1H), 1.31 (d, *J* = 7.1 Hz, 3H), 1.24 (d, *J* = 7.0 Hz, 3H). ppm. **<sup>13</sup>C NMR** (101 MHz, CDCl<sub>3</sub>):

$\delta$  196.2, 195.7, 145.0, 144.7 (2 C), 144.6, 130.9, 130.7, 130.6, 130.4, 129.3, 129.0, 128.2 (2 C), 127.9 (2 C), 127.9 (2 C), 127.8 (2 C), 127.4, 126.8, 126.4, 126.1, 124.8, 124.7, 124.6, 124.4, 123.3, 123.0, 122.7, 122.5, 53.0, 53.0, 41.3, 41.3, 40.8, 40.3, 36.4, 36.0, 19.8, 19.3 ppm. **HRMS** (HESI):  $m/z$   $[M+Na]^+$  calcd for  $C_{21}H_{22}N_2ONa$ : 341.1624, found: 341.1624.

(3*S*)-2-(Cyclohepta-2,4,6-trien-1-yl)-3-(4-fluorophenyl)-1-(1-methyl-1*H*-imidazol-2-yl)butan-1-one (**3e**)

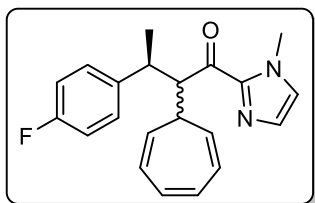

Light brown solid, yield: 69% (58.0 mg), diastereoselective ratio 3:1, purified by silica gel flash chromatography (hexane/EtOAc 15:1-4:1). The diastereomers were separated by flash chromatography. **<sup>1</sup>H NMR (3e-diast1)** (400 MHz,  $CDCl_3$ ):  $\delta$  7.20 – 7.14 (m, 2H), 7.12 (d,  $J = 0.7$  Hz, 1H), 6.91 (bs, 1H), 6.86 – 6.79 (m, 2H), 6.69 – 6.65 (m, 2H), 6.22 – 6.12 (m, 2H), 5.56 (dd,  $J = 9.4, 5.9$  Hz, 1H), 5.26 (dd,  $J = 9.3, 6.0$  Hz, 1H), 4.68 (dd,  $J = 9.1, 7.3$  Hz, 1H), 3.76 (s, 3H), 3.50 – 3.42 (m, 1H), 2.11 – 2.03 (m, 1H), 1.28 (d,  $J = 7.1$  Hz, 3H) ppm. **<sup>1</sup>H NMR (3e-diast2)** (400 MHz,  $CDCl_3$ ):  $\delta$  7.20 – 7.16 (m, 3H), 7.03 (bs, 1H), 6.93 – 6.84 (m, 2H), 6.54 – 6.50 (m, 2H), 6.13 – 6.06 (m, 1H), 6.00 – 5.94 (m, 1H), 5.47 (dd,  $J = 9.4, 5.8$  Hz, 1H), 5.07 (dd,  $J = 9.3, 6.1$  Hz, 1H), 4.64 (dd,  $J = 9.4, 7.5$  Hz, 1H), 4.00 (s, 3H), 3.48 – 3.40 (m, 1H), 1.69 (dd,  $J = 12.7, 6.1$  Hz, 1H), 1.22 (d,  $J = 7.0$  Hz, 3H) ppm. **<sup>13</sup>C NMR (3e-diast1)** (101 MHz,  $CDCl_3$ ):  $\delta$  195.5, 164.9, 160.0, 144.6, 140.4, 131.0, 130.7, 129.4, 129.3, 129.1, 124.9, 124.7, 123.2, 122.5, 114.7, 114.5, 52.9, 40.5, 40.2, 36.1, 19.9 ppm. **<sup>13</sup>C NMR (3e-diast2)** (101 MHz,  $CDCl_3$ ):  $\delta$  196.0, 162.7, 160.3, 144.9, 140.3, 140.2, 130.8, 130.5, 129.4, 129.1, 129.1, 124.8, 124.5, 122.8, 115.0, 114.8, 53.1, 40.8, 40.5, 36.4, 19.4 ppm. **HRMS (3e-diast1)** (HESI):  $m/z$   $[M+Na]^+$  calcd for  $C_{21}H_{21}FN_2ONa$ : 359.1530, found: 359.1530. **HRMS (3e-diast2)** (HESI):  $m/z$   $[M+Na]^+$  calcd for  $C_{21}H_{21}FN_2ONa$ : 359.1530, found: 359.1530.

(3*S*)-2-(Cyclohepta-2,4,6-trien-1-yl)-3-(4-methoxyphenyl)-1-(1-methyl-1*H*-imidazol-2-yl)butan-1-one (**3f**)

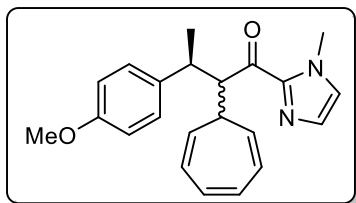

Light yellow oil, yield: 25% (22.0 mg), d. r. 3:1, purified by silica gel flash chromatography (hexane/EtOAc 15:1 – 4:1). The diastereomers were not separated. **<sup>1</sup>H NMR** (400 MHz,  $CDCl_3$ ):  $\delta$  7.20 – 7.05 (m, 6H), 7.03 (bs, 1H), 6.89 (bs, 1H), 6.74 (d,  $J = 8.7$  Hz, 2H), 6.69 (d,  $J = 8.7$  Hz, 2H), 6.68 – 6.65 (m, 2H), 6.52 – 6.50 (m, 2H), 6.19 – 6.14 (m, 2H), 6.09 (dd,  $J = 9.3, 4.9$  Hz, 1H), 5.96 (dd,  $J = 9.1, 4.7$  Hz, 1H), 5.56 (dd,  $J = 9.4, 5.9$  Hz, 1H), 5.49 (dd,  $J = 9.4, 5.8$  Hz,

1H), 5.28 (dd,  $J = 9.2, 6.0$  Hz, 1H), 5.08 (dd,  $J = 9.3, 6.0$  Hz, 1H), 4.71 – 4.60 (m, 2H), 4.01 (s, 3H), 3.80 (s, 3H), 3.75 (s, 3H), 3.71 (s, 3H), 3.45 – 3.36 (m, 2H), 2.13 – 2.03 (m, 1H), 1.75 – 1.70 (m, 1H), 1.26 (d,  $J = 3.5$  Hz, 3H), 1.21 (d,  $J = 7.0$  Hz, 3H) ppm.  $^{13}\text{C}$  NMR (101 MHz,  $\text{CDCl}_3$ ):  $\delta$  196.4, 195.8, 158.1, 157.8, 145.0, 144.7, 136.8, 136.7, 130.9, 130.7, 130.6, 130.4, 129.3, 129.0, 128.9, 128.6 (2 C), 128.5, 127.4, 126.9, 124.8, 124.7, 124.6, 124.3, 123.4, 123.1, 122.7, 122.6, 113.5 (2 C), 113.3 (2 C), 55.2, 55.2, 53.3, 53.1, 40.9, 40.5, 40.4, 40.3, 36.4, 36.1, 20.0, 19.6 ppm. HRMS (HESI):  $m/z$   $[\text{M}+\text{Na}]^+$  calcd for  $\text{C}_{22}\text{H}_{24}\text{N}_2\text{O}_2\text{Na}$ : 371.1730, found: 371.1730.

(3R)-1-(1-Benzyl-1H-imidazol-2-yl)-2-(cyclohepta-2,4,6-trien-1-yl)-3-methyldecane-1-one

(3g)

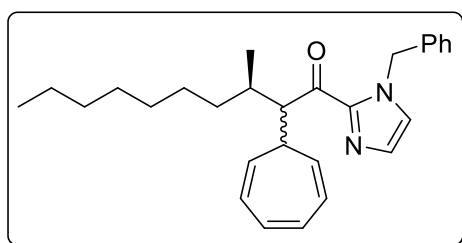

Yellow oil, yield: 19% (20.0 mg), d. r. 1:1, purified by silica gel flash chromatography (hexane/EtOAc 4:1).

The diastereomers were not separated.  $^1\text{H}$  NMR (400 MHz,  $\text{CDCl}_3$ ):  $\delta$  7.34 – 7.24 (m, 7H), 7.24 – 7.19 (m, 3H), 7.16 – 7.11 (m, 4H), 6.70 – 6.61 (m, 4H), 6.23 –

6.12 (m, 2H), 6.12 – 6.04 (m, 2H), 5.77 (s, 1H), 5.74 (s, 1H), 5.58 – 5.47 (m, 2H), 5.33 – 5.16 (m, 4H), 4.47 (dd,  $J = 10.4, 5.4$  Hz, 1H), 4.38 (dd,  $J = 9.0, 6.7$  Hz, 1H), 2.13 – 2.20 (m, 4H), 1.35 – 1.15 (m, 24H), 0.88 – 0.85 (m, 6H), 0.83 (d,  $J = 6.9$  Hz, 3H), 0.72 (d,  $J = 6.8$  Hz, 3H) ppm.  $^{13}\text{C}$  NMR (101 MHz,  $\text{CDCl}_3$ ):  $\delta$  196.7, 196.5, 144.6, 144.4, 136.6 (2 C), 131.0, 130.9, 130.5 (2 C), 129.5, 129.4, 128.8 (2 C), 128.8 (2 C), 128.0 (2 C), 127.5 (2 C), 127.5 (2 C), 126.4 (2 C), 124.8 (2 C), 124.6 (2 C), 123.9, 123.5, 123.1, 122.9, 52.5, 52.0, 52.0, 51.4, 39.8, 39.6, 35.1, 34.5, 34.5, 33.5, 31.9 (2 C), 29.6, 29.6, 29.3, 29.2, 27.3, 27.3, 22.7 (2 C), 17.6, 15.4, 14.1 (2 C) ppm. HRMS (HESI):  $m/z$   $[\text{M}+\text{Na}]^+$  calcd for  $\text{C}_{28}\text{H}_{26}\text{N}_2\text{ONa}$ : 439.2720, found: 339.2720.

(3R)-1-(1-Butyl-1H-imidazol-2-yl)-2-(cyclohepta-2,4,6-trien-1-yl)-3-methyldecane-1-one (3h)

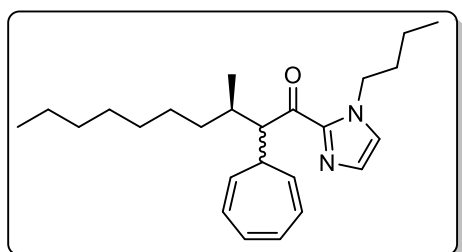

Yellow oil, yield: 21% (20.0 mg), d. r. 1:1, purified by silica gel flash chromatography (hexane/EtOAc 4:1).

The diastereomers were not separated.  $^1\text{H}$  NMR (400 MHz,  $\text{CDCl}_3$ ):  $\delta$  7.22 – 7.15 (m, 2H), 7.08 (bs, 2H), 6.67 – 6.65 (m, 4H), 6.24 – 6.05 (m, 4H), 5.36 (dd,  $J = 9.3,$

5.9 Hz, 1H), 5.31 – 5.21 (m, 3H), 4.56 – 4.23 (m, 6H), 2.24 – 2.14 (m, 2H), 2.11 – 1.99 (m, 2H), 1.77 – 1.70 (m, 4H), 1.48 – 1.13 (m, 28H), 0.98 – 0.79 (m, 18H) ppm.  $^{13}\text{C}$  NMR (101



MHz, CDCl<sub>3</sub>):  $\delta$  196.6, 196.4, 144.5, 144.3, 131.0, 130.9, 130.6 (2 C), 129.2, 129.1, 126.3 (2 C), 124.7 (2 C), 124.6, 124.6, 123.9, 123.5, 123.1, 123.0, 52.3, 51.4, 48.7, 48.7, 39.9, 39.8, 35.1, 34.5, 33.8, 33.2 (2 C), 33.2, 31.9 (2 C), 29.6 (2 C), 29.2 (2 C), 27.4, 27.3, 22.7 (2 C), 19.7 (2 C), 17.6, 15.8, 14.1 (2 C), 13.7 (2 C) ppm. **HRMS** (HESI):  $m/z$  [M+Na]<sup>+</sup> calcd for C<sub>25</sub>H<sub>38</sub>N<sub>2</sub>O<sub>2</sub>Na: 405.2876, found: 405.2876.

(3*R*)-2-(Cyclohepta-2,4,6-trien-1-yl)-3-methyl-1-(1-methyl-1*H*-benzo[*d*]imidazol-2-yl)decan-1-one (**3i**)

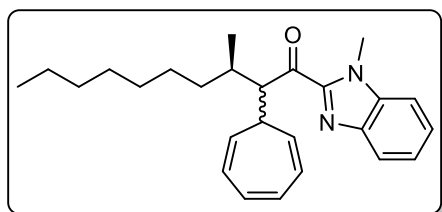

Yellow oil, yield: 65% (66.0 mg), d. r. 1:1, purified by silica gel flash chromatography (hexane/EtOAc 4:1). The diastereomers were not separated. **<sup>1</sup>H NMR** (400 MHz, CDCl<sub>3</sub>):  $\delta$  7.96 – 7.93 (m, 2H), 7.45 – 7.43 (m, 4H), 7.42 – 7.35 (m, 2H), 6.69 – 6.67 (m, 4H), 6.26 – 6.09 (m, 4H), 5.40 (dd,  $J = 9.3, 5.8$  Hz, 1H), 5.35 – 5.29 (m, 3H), 4.75 (dd,  $J = 10.3, 5.4$  Hz, 1H), 4.66 (dd,  $J = 9.0, 6.7$  Hz, 1H), 4.14 (s, 3H), 4.14 (s, 3H), 2.33 – 2.20 (m, 2H), 2.16 – 2.04 (m, 2H), 1.26 – 1.19 (m, 24H), 0.96 (d,  $J = 6.9$  Hz, 3H), 0.92 (d,  $J = 6.8$  Hz, 3H), 0.88 – 0.82 (m, 6H) ppm. **<sup>13</sup>C NMR** (101 MHz, CDCl<sub>3</sub>):  $\delta$  199.9, 199.6, 148.0, 147.8, 141.7 (2 C), 137.2 (2 C), 131.0, 131.0, 130.6 (2 C), 126.0, 126.0, 124.9, 124.9, 124.8, 124.7, 123.8, 123.7, 123.6, 123.3, 122.9, 122.8, 122.2 (2 C), 110.6 (2 C), 53.4, 53.1 (2 C), 52.1, 40.0, 39.8, 35.2, 34.7, 34.6, 33.7, 32.5, 32.4, 31.8 (2 C), 29.6, 29.3, 27.4 (2 C), 22.7, 22.6, 17.6, 15.6, 14.1, 14.1 ppm. **HRMS** (HESI):  $m/z$  [M+Na]<sup>+</sup> calcd for C<sub>26</sub>H<sub>34</sub>N<sub>2</sub>O<sub>2</sub>Na: 313.2563, found: 413.2563.

*N,N*-Dimethyl-4-(1-(1-methyl-1*H*-indol-3-yl)ethyl)aniline (**S1**)

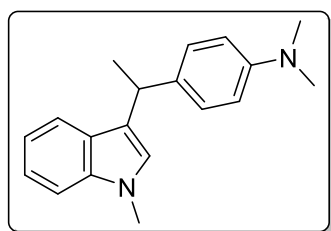

Brown solid, yield: 70% (56.0 mg), purified by flash chromatography (SiO<sub>2</sub>, Hex/EtOAc 10:1). **Mp**: 93.2-94.4 °C. **<sup>1</sup>H NMR** (400 MHz, CDCl<sub>3</sub>):  $\delta$  7.43 (d,  $J = 7.9$  Hz, 1H), 7.27 (d,  $J = 7.3$  Hz, 1H), 7.21 – 7.16 (m, 3H), 7.00 (t,  $J = 7.5$  Hz, 1H), 6.80 (s, 1H), 6.70 (d,  $J = 8.6$  Hz, 2H), 4.30 (q,  $J = 7.1$  Hz, 1H), 3.75 (s, 3H), 2.91 (s, 6H), 1.67 (d,  $J = 7.1$  Hz, 3H) ppm. **<sup>13</sup>C NMR** (101 MHz, CDCl<sub>3</sub>):  $\delta$  149.0, 137.3, 135.2, 128.0 (2 C), 127.3, 125.8, 121.3, 120.8, 120.0, 118.5, 112.9 (2 C), 109.0, 40.9 (2 C), 35.8, 32.6, 22.6 ppm. **IR** (ATR): 3056, 2964, 2922, 1616, 1523, 1474, 1354, 1325, 1155, 1084, 946 cm<sup>-1</sup>. **HRMS** (HESI):  $m/z$  [M+Na]<sup>+</sup> calcd for C<sub>19</sub>H<sub>22</sub>N<sub>2</sub>Na: 301.1675, found: 301.1675.

## 5. Copies of NMR, MS, HRMS, and HPLC spectra

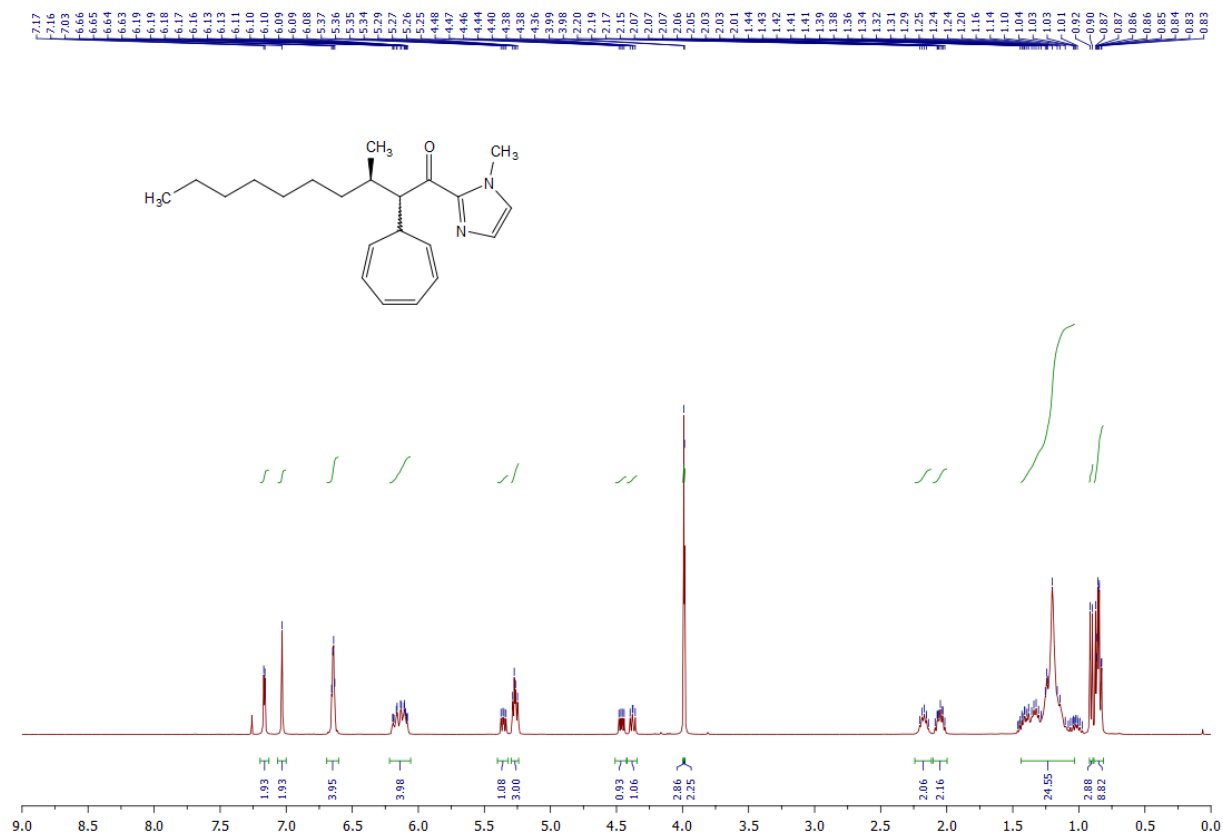

$^1\text{H}$  NMR spectrum of compound 3a.

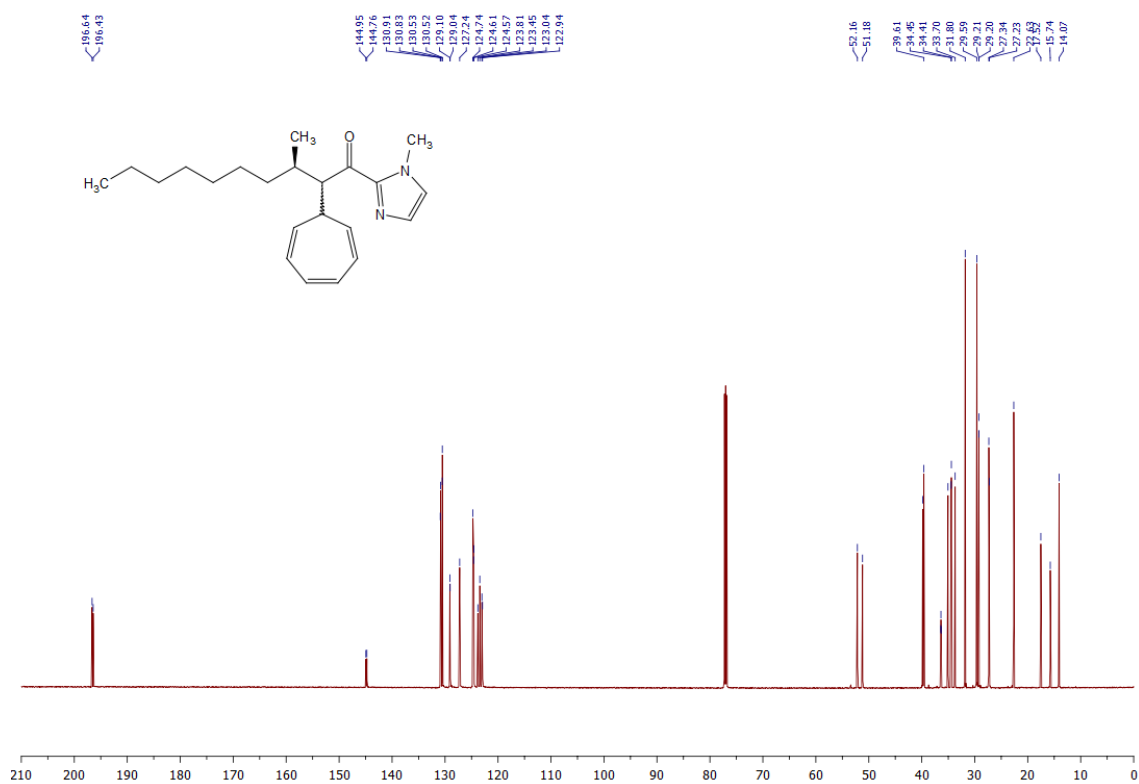

$^{13}\text{C}$  NMR spectrum of compound 3a.

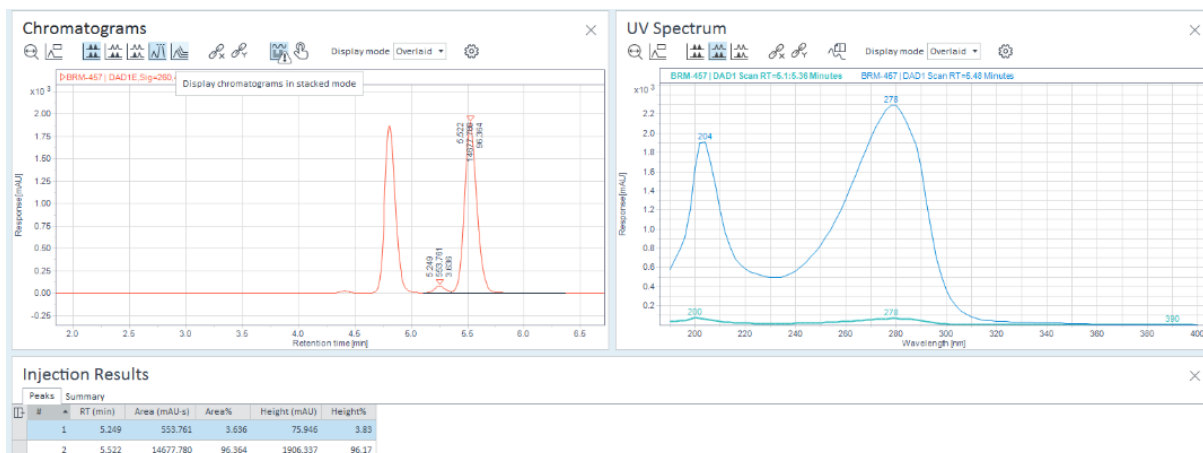

HPLC chromatogram of compound **3a** (non-racemic).

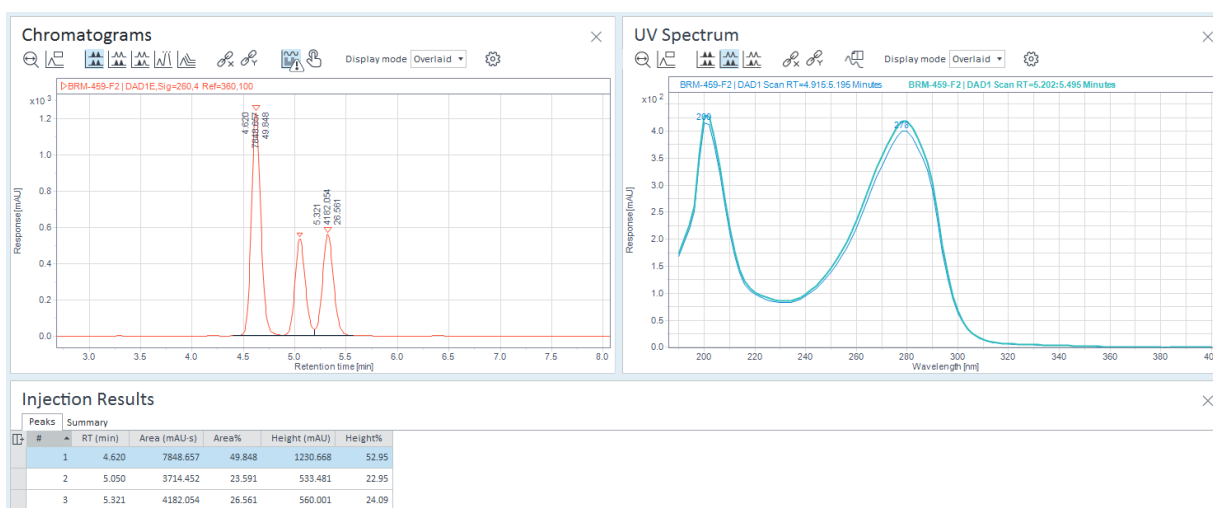

HPLC chromatogram of compound **3a** (racemic).

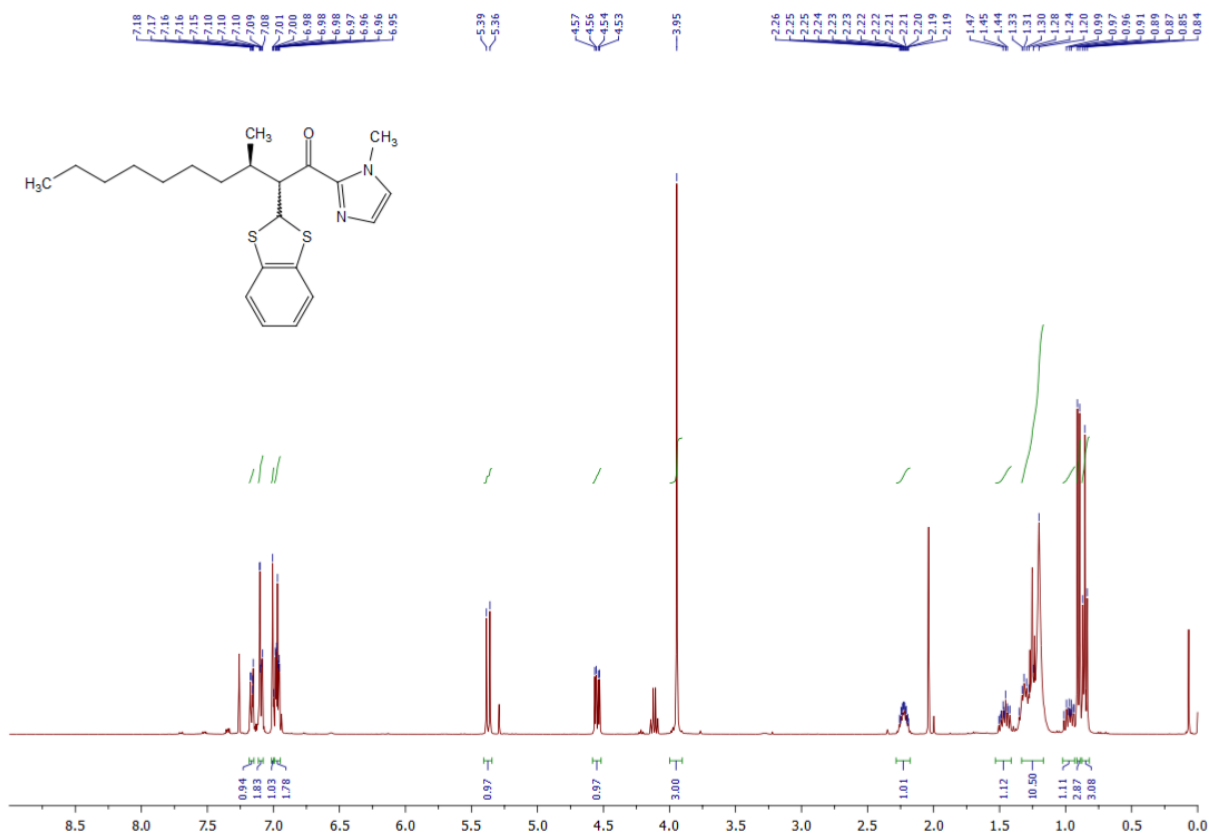

<sup>1</sup>H NMR spectrum of compound 4 (diastereomer 1).

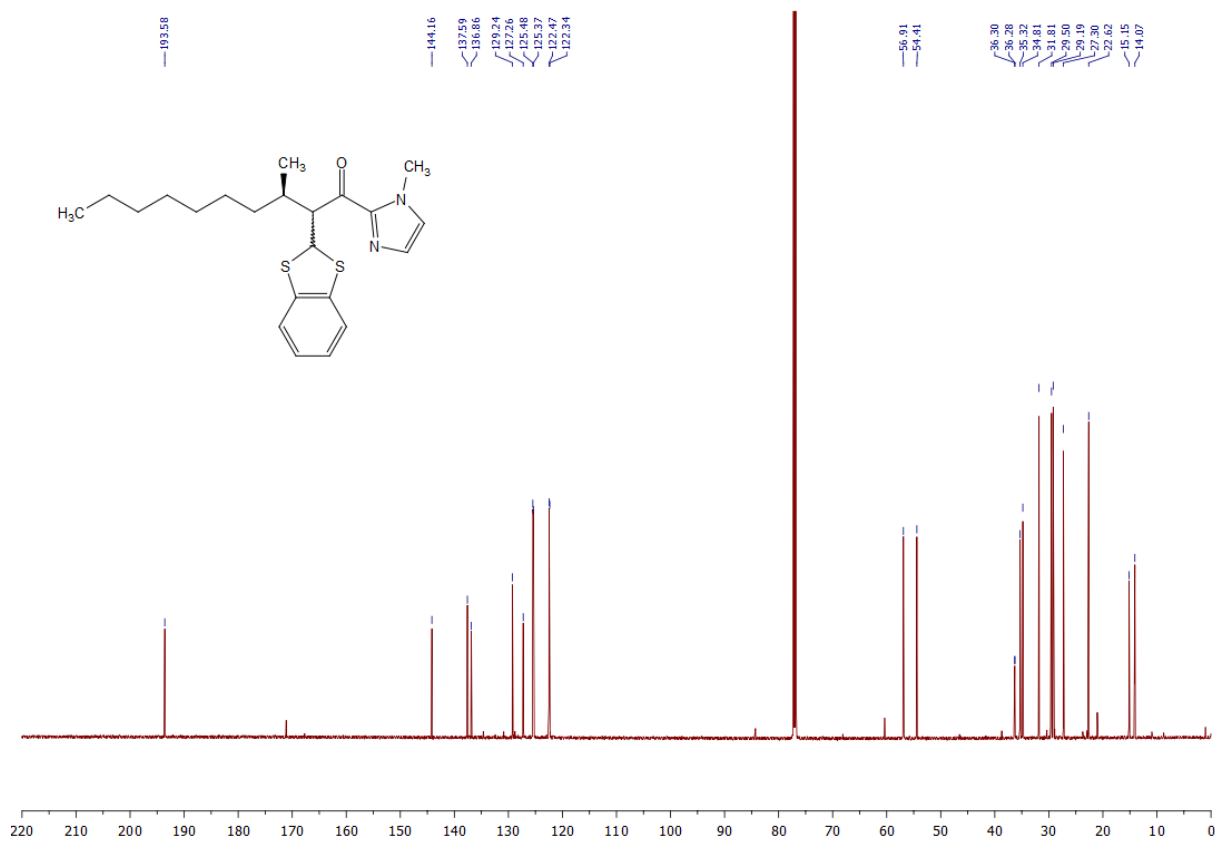

<sup>13</sup>C NMR spectrum of compound 4 (diastereomer 1).

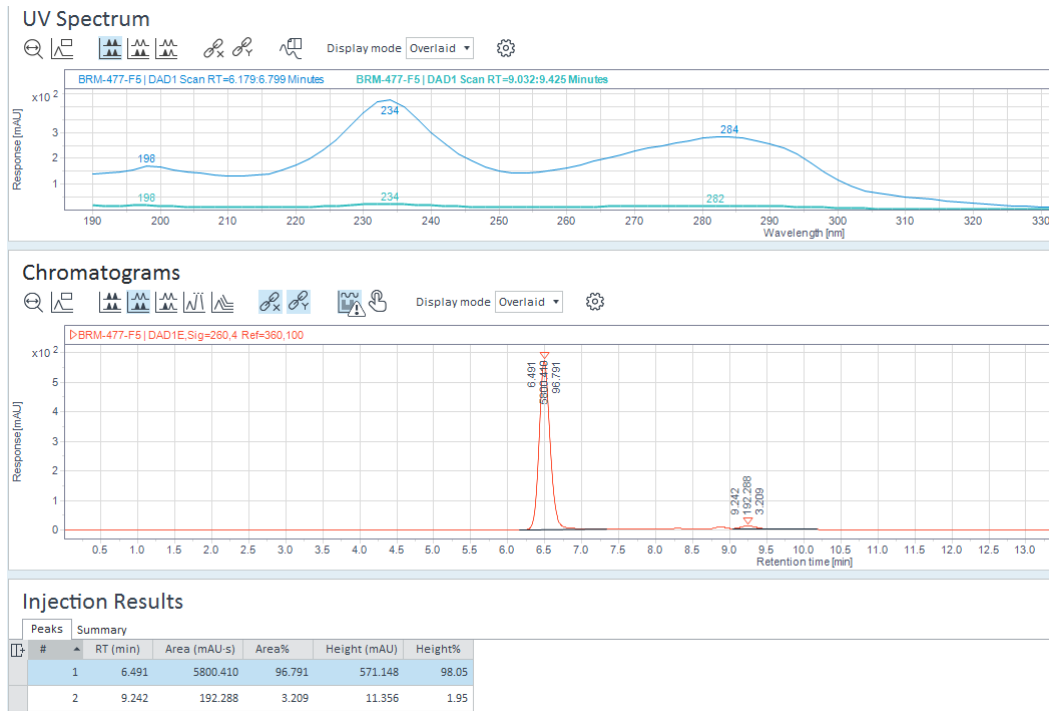

HPLC chromatogram of compound **4** (**diastereomer 1**) (non-racemic).

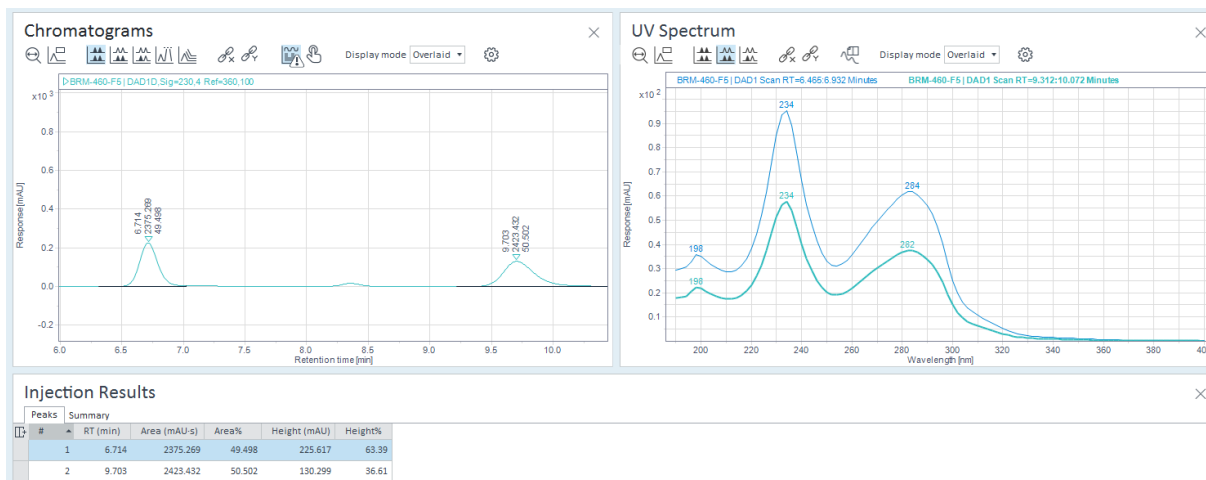

HPLC chromatogram of compound **4** (**diastereomer 1**) (racemic).

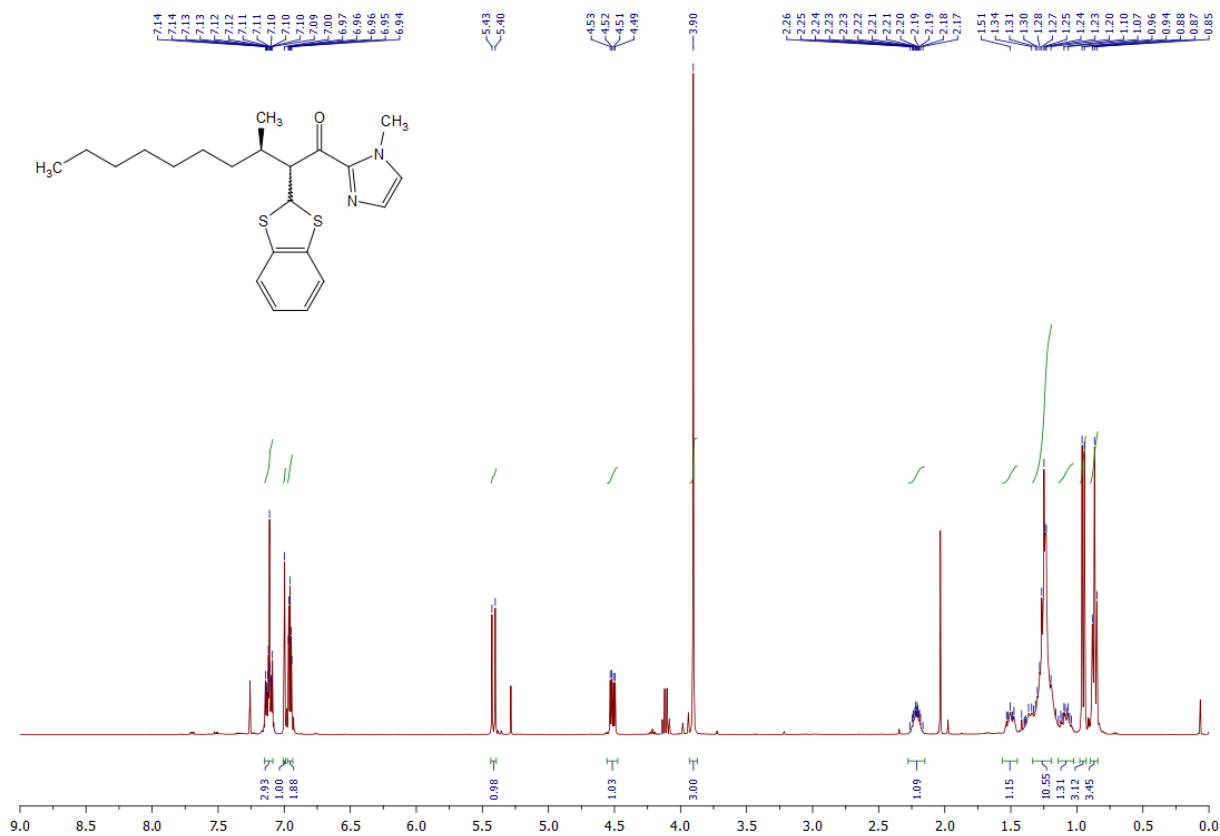

**<sup>1</sup>H NMR spectrum of compound 4 (diastereomer 2).**

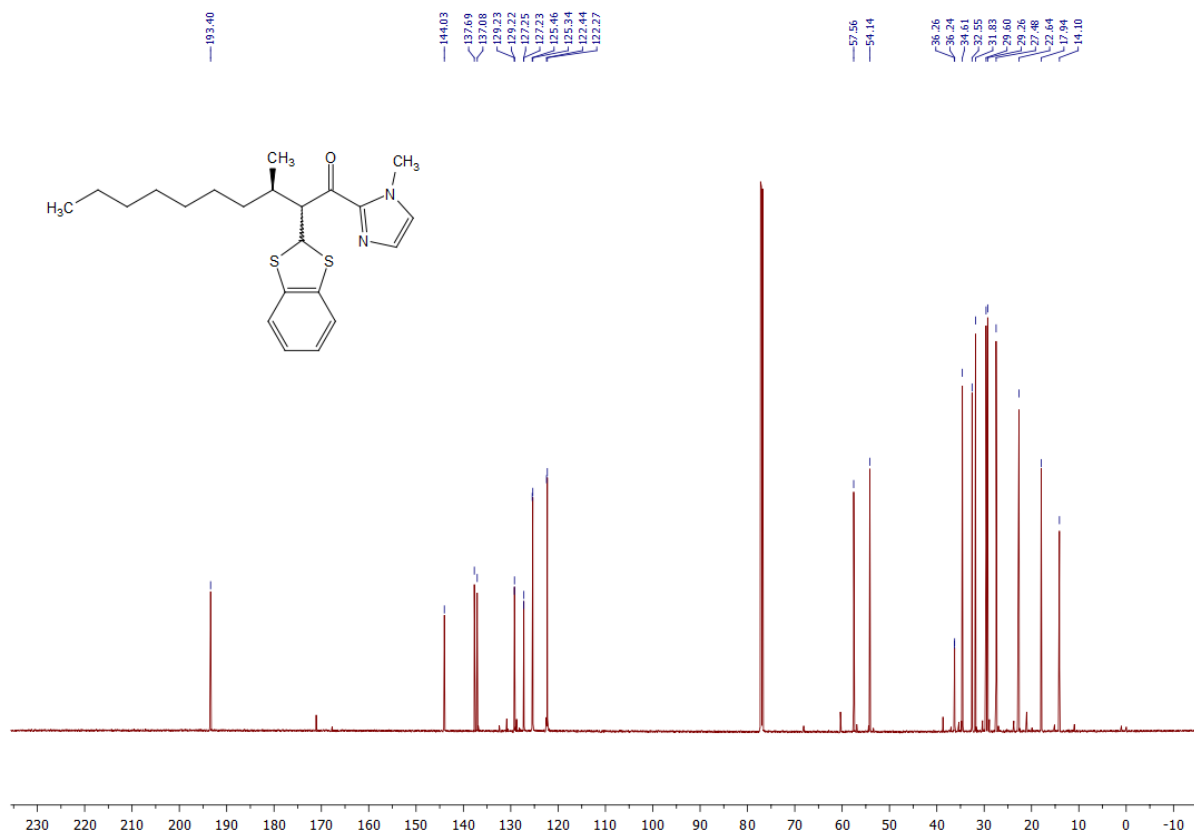

**<sup>13</sup>C NMR spectrum of compound 4 (diastereomer 2).**

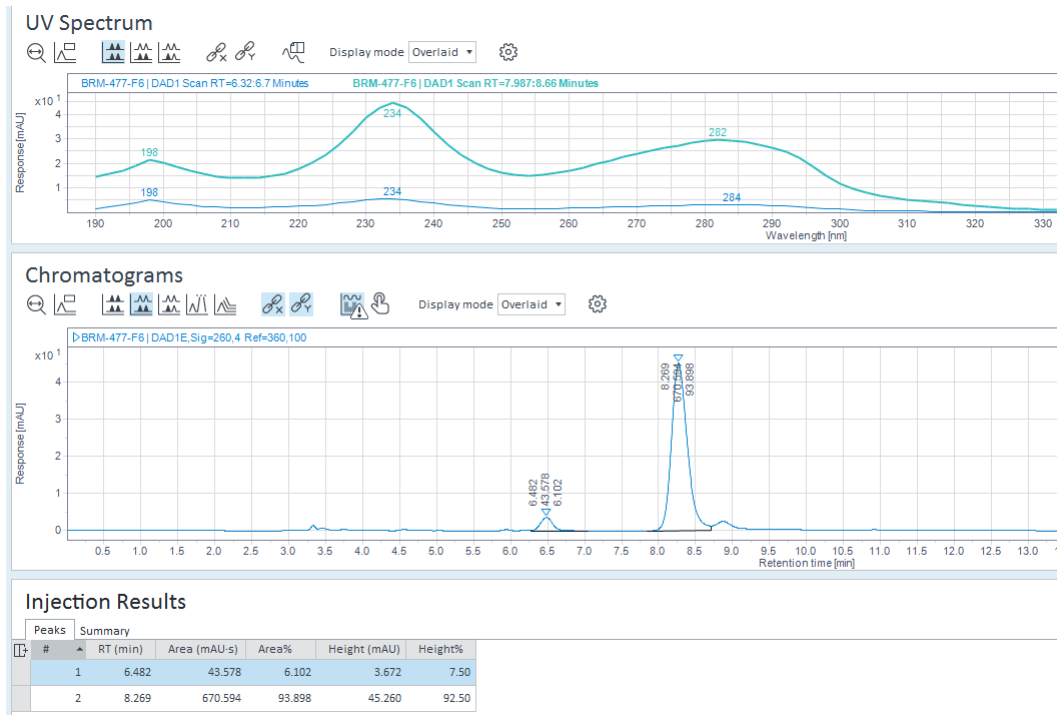

HPLC chromatogram of compound **4 (diastereomer 2)** (non-racemic).

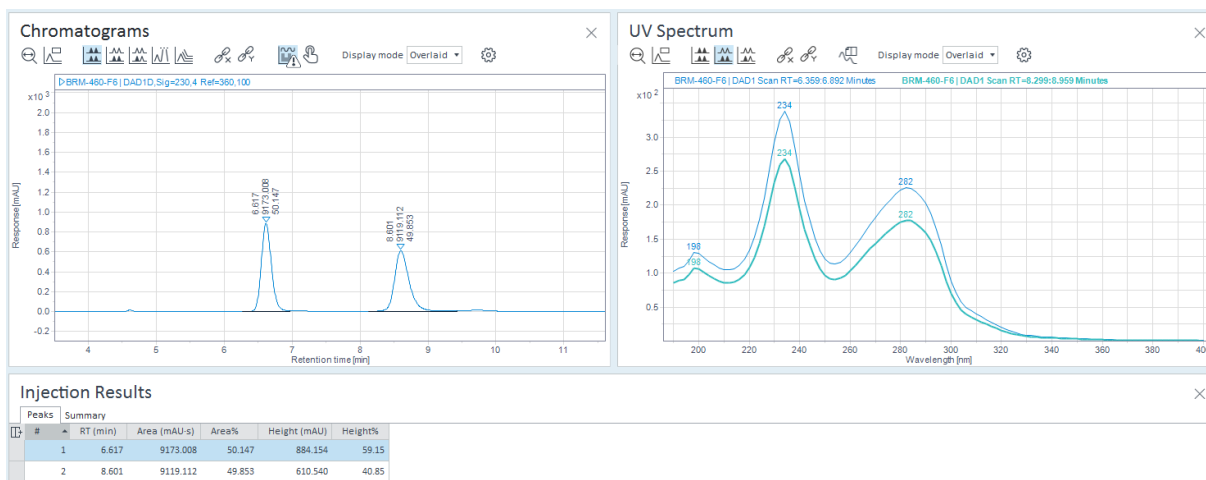

HPLC chromatogram of compound **4 (diastereomer 2)** (racemic).

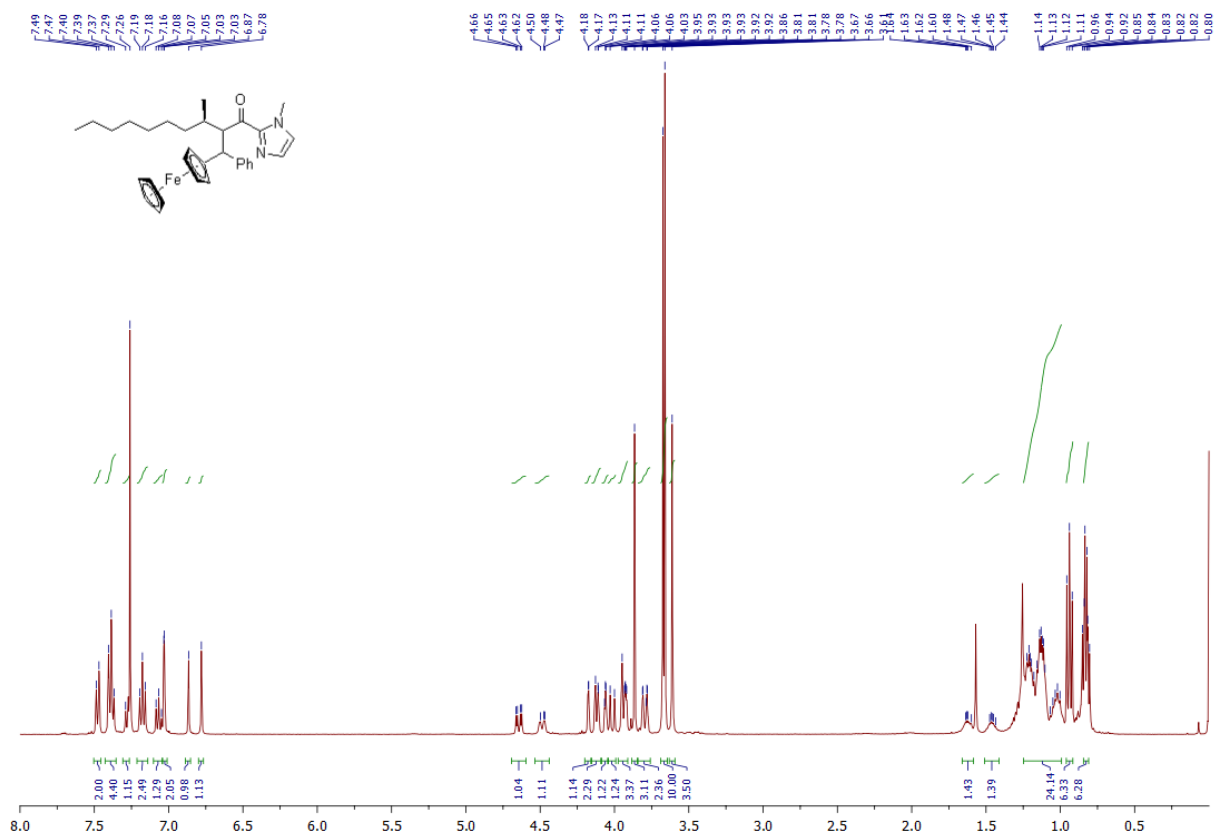

$^1\text{H}$  NMR spectrum of compound 5 (diastereomer 1,2).

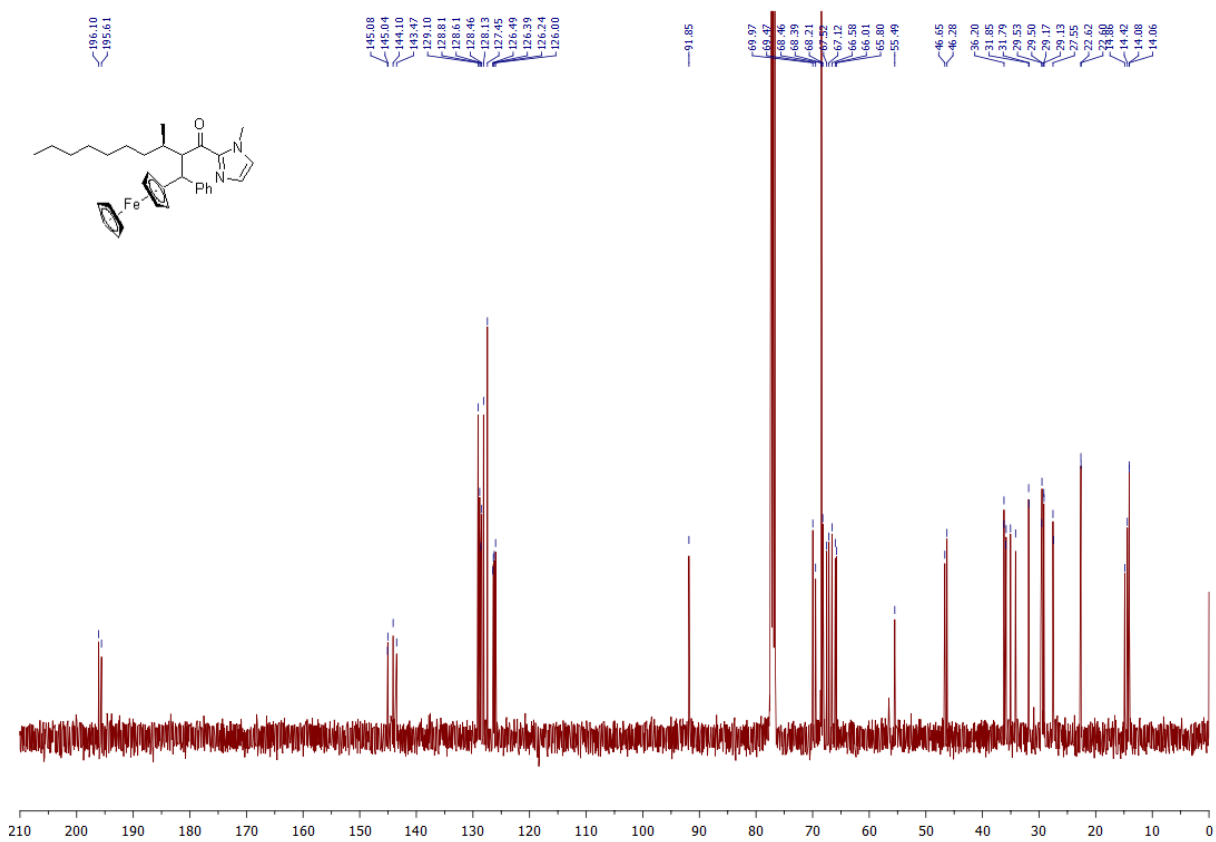

$^{13}\text{C}$  NMR spectrum of compound 5 (diastereomer 1,2).



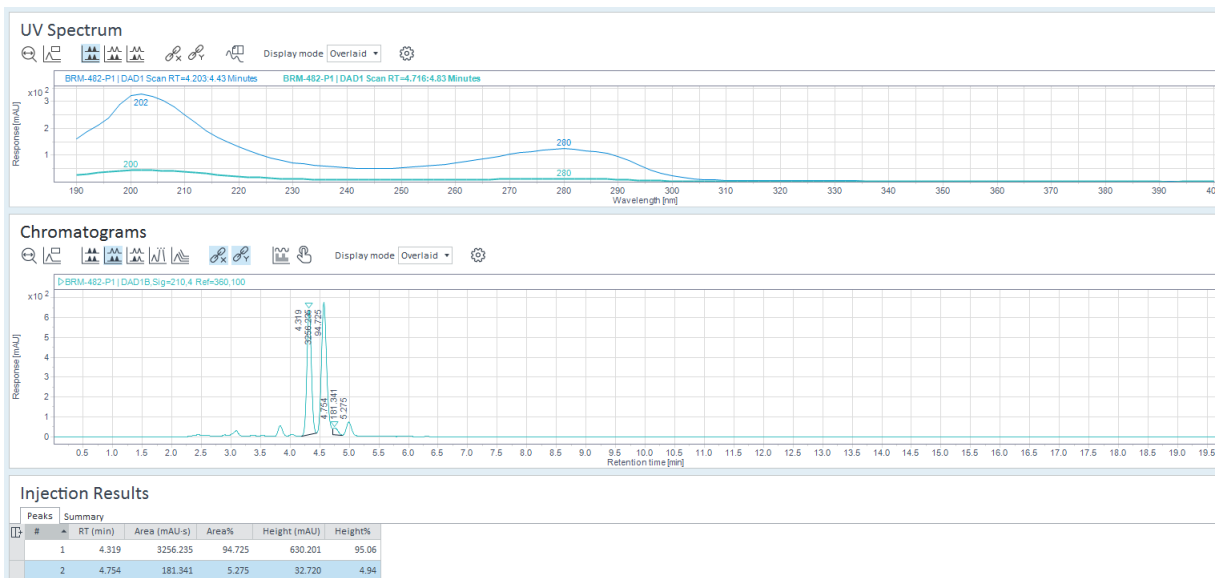

HPLC chromatogram of compound **5 (diastereomer 1)** (non-racemic).

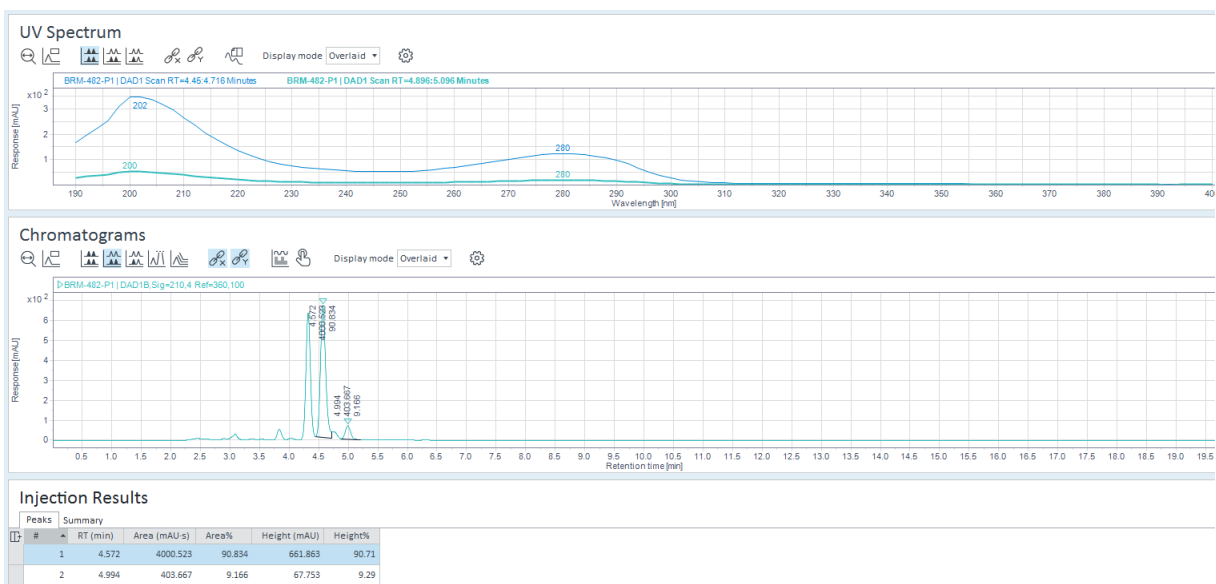

HPLC chromatogram of compound **5 (diastereomer 2)** (non-racemic).

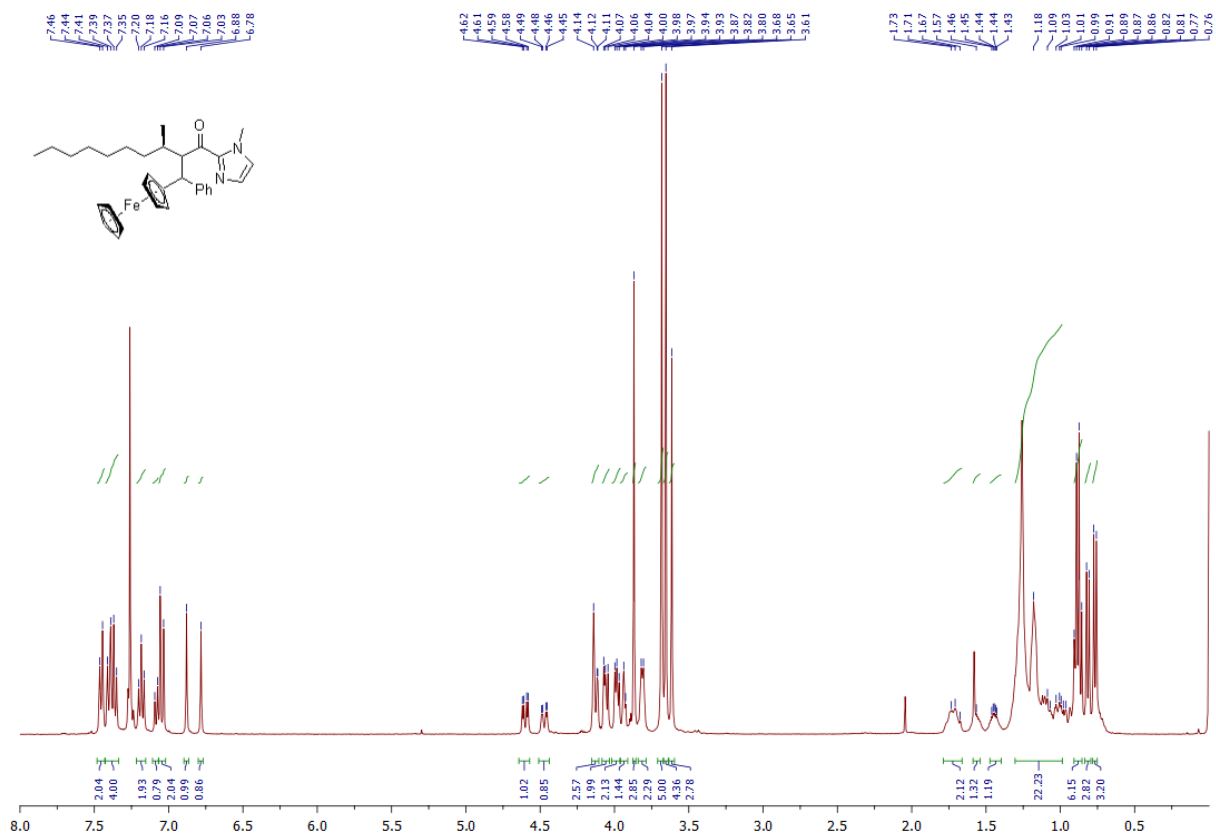

<sup>1</sup>H NMR spectrum of compound 5 (diastereomer 3,4).

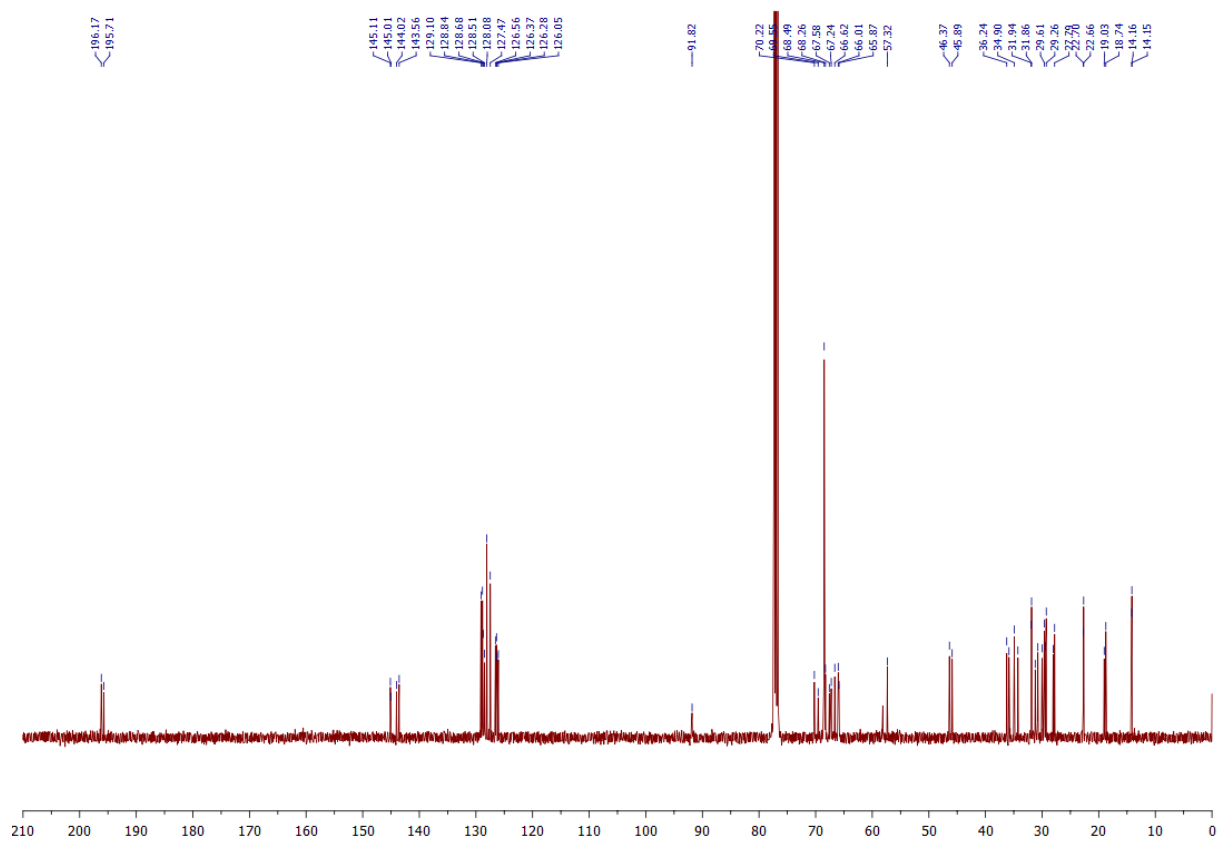

<sup>13</sup>C NMR spectrum of compound 5 (diastereomer 3,4).

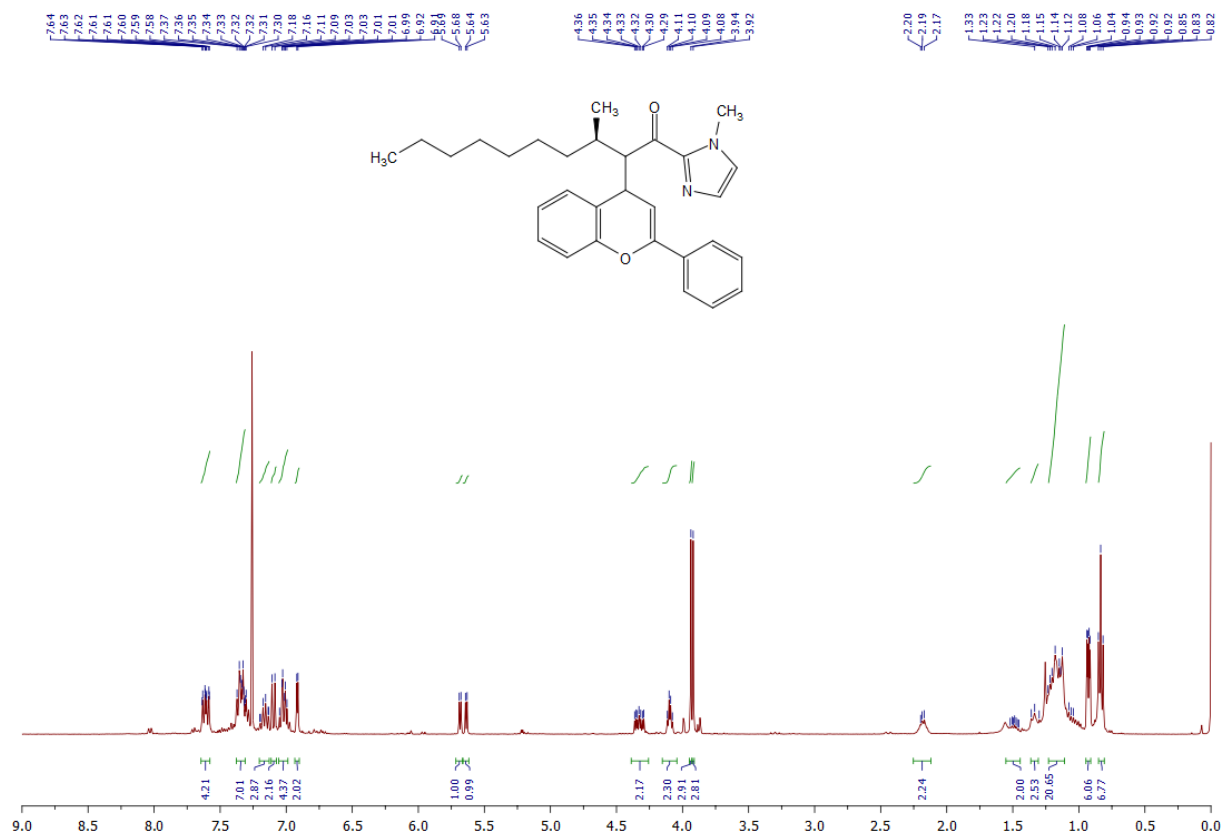

<sup>1</sup>H NMR spectrum of compound **6** (diastereomer **1,2**).

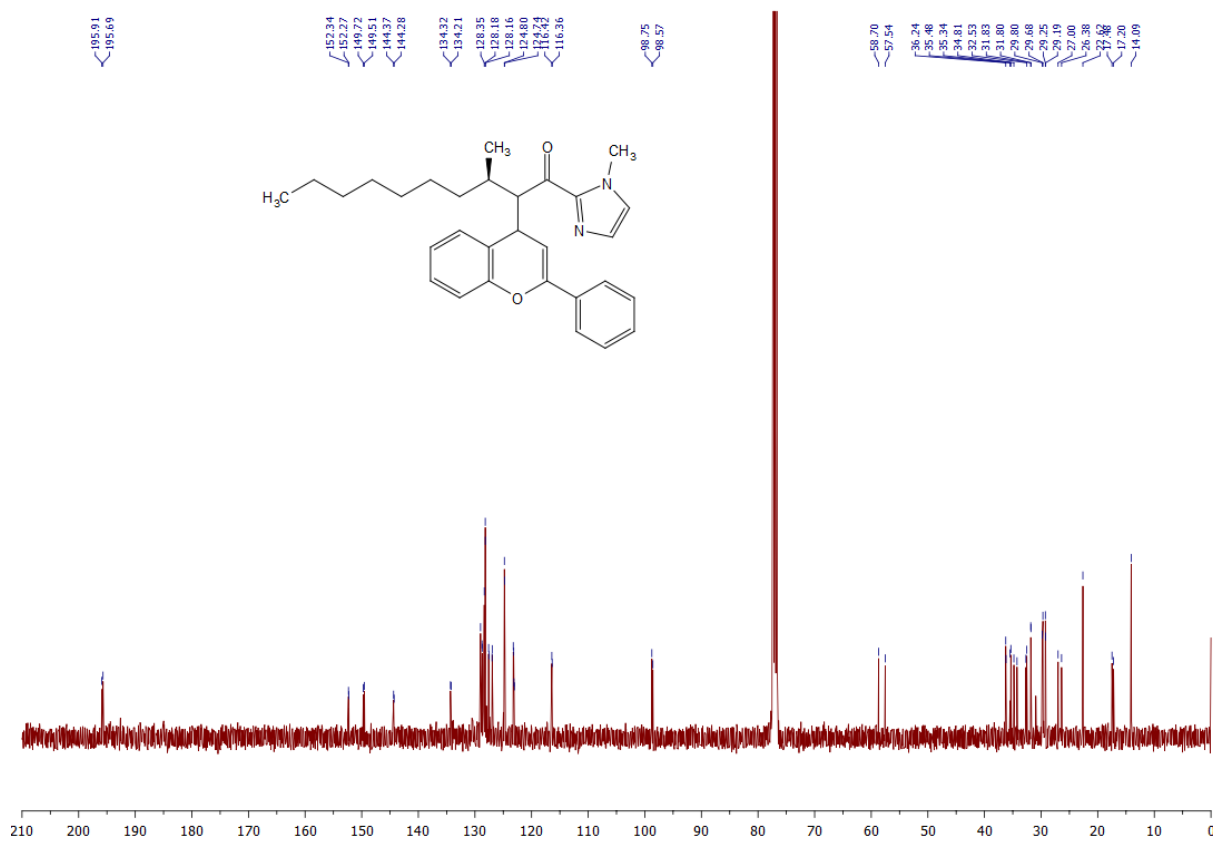

<sup>13</sup>C NMR spectrum of compound **6** (diastereomer **1,2**).

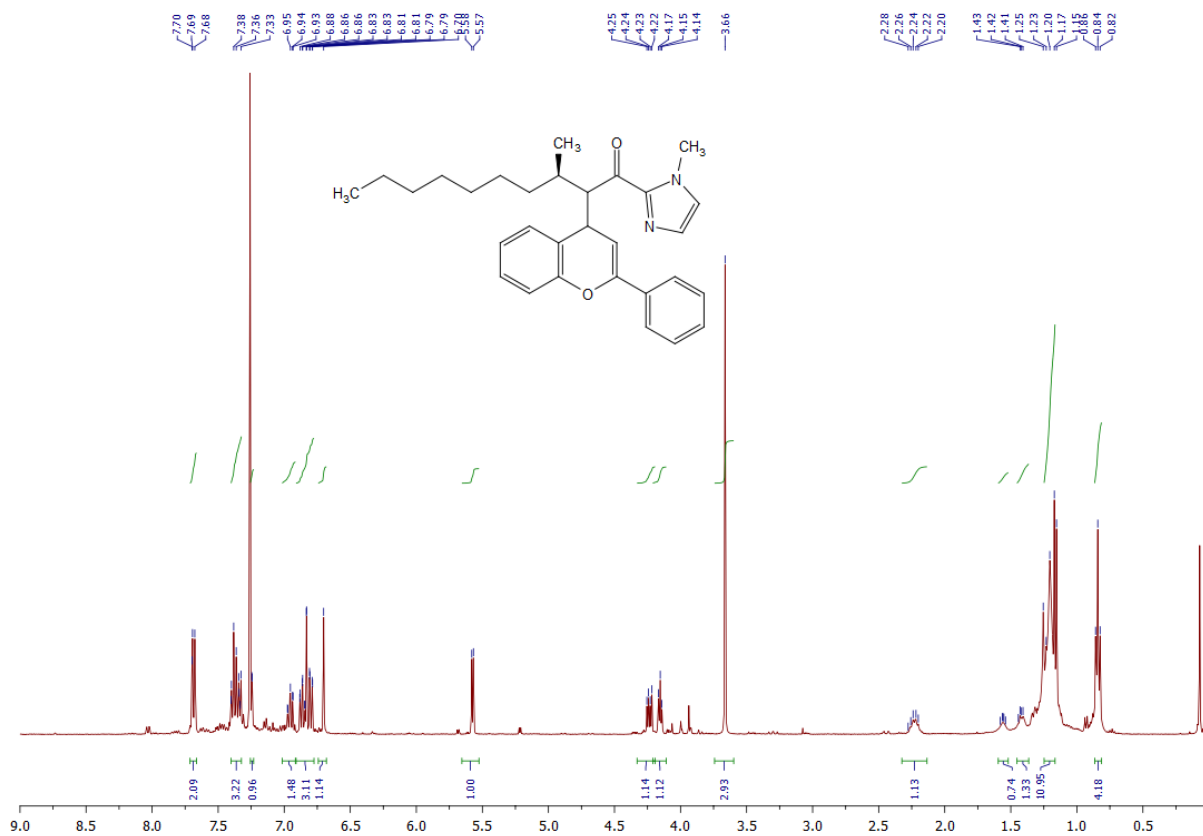

**<sup>1</sup>H NMR spectrum of compound 6 (diastereomer 3).**

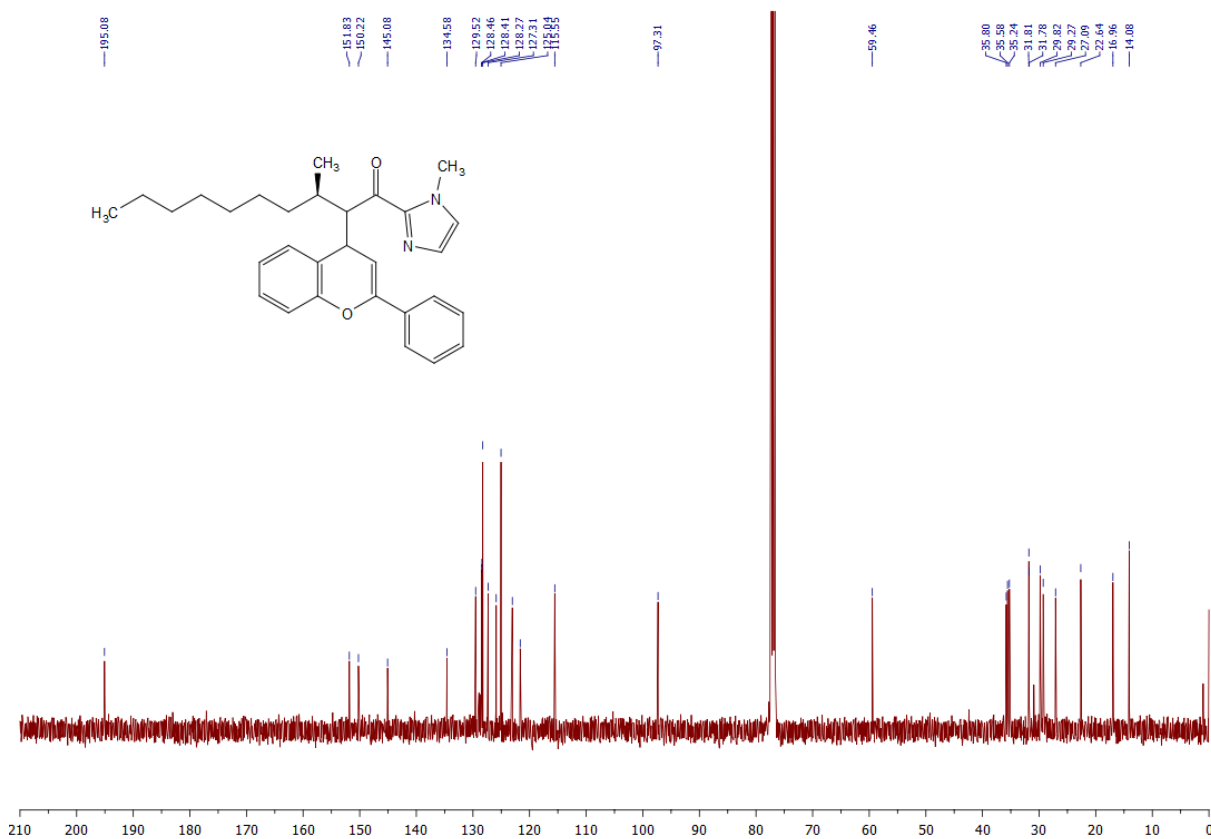

**<sup>13</sup>C NMR spectrum of compound 6 (diastereomer 3).**

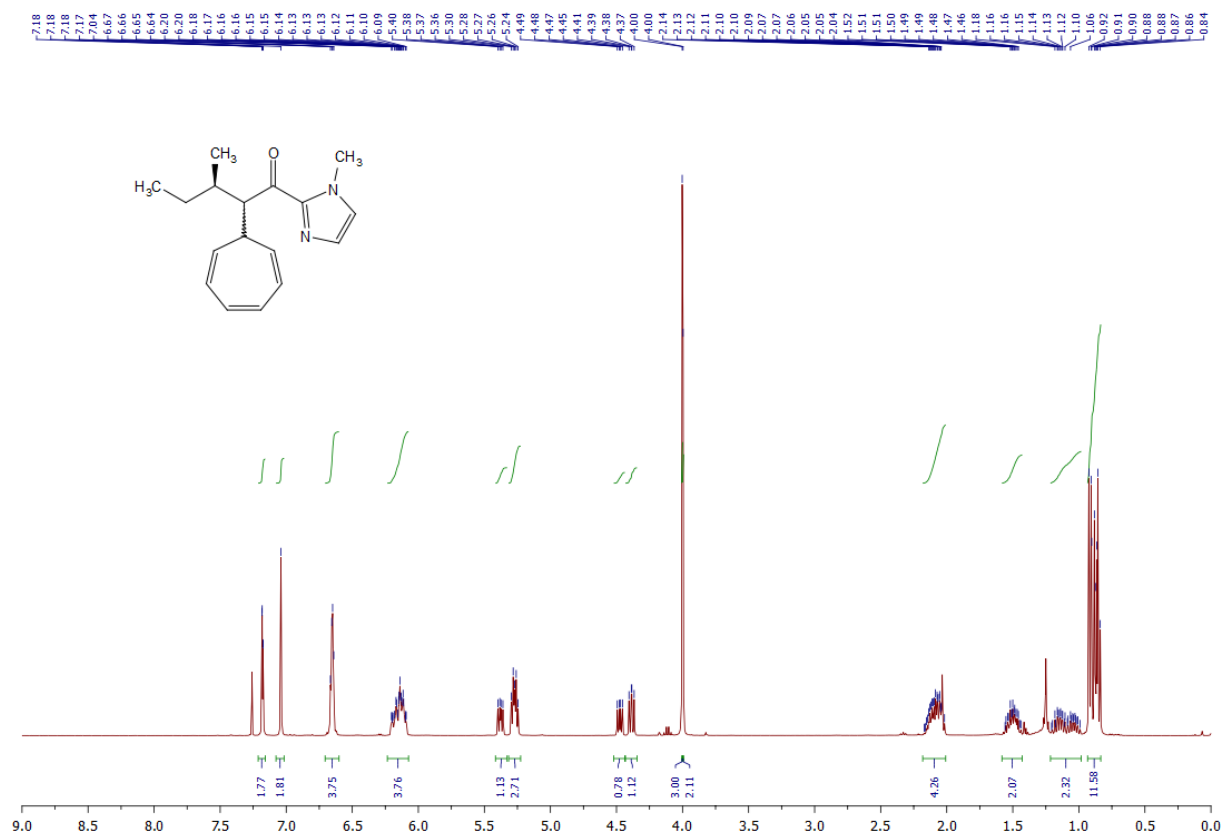

<sup>1</sup>H NMR spectrum of compound 3b.

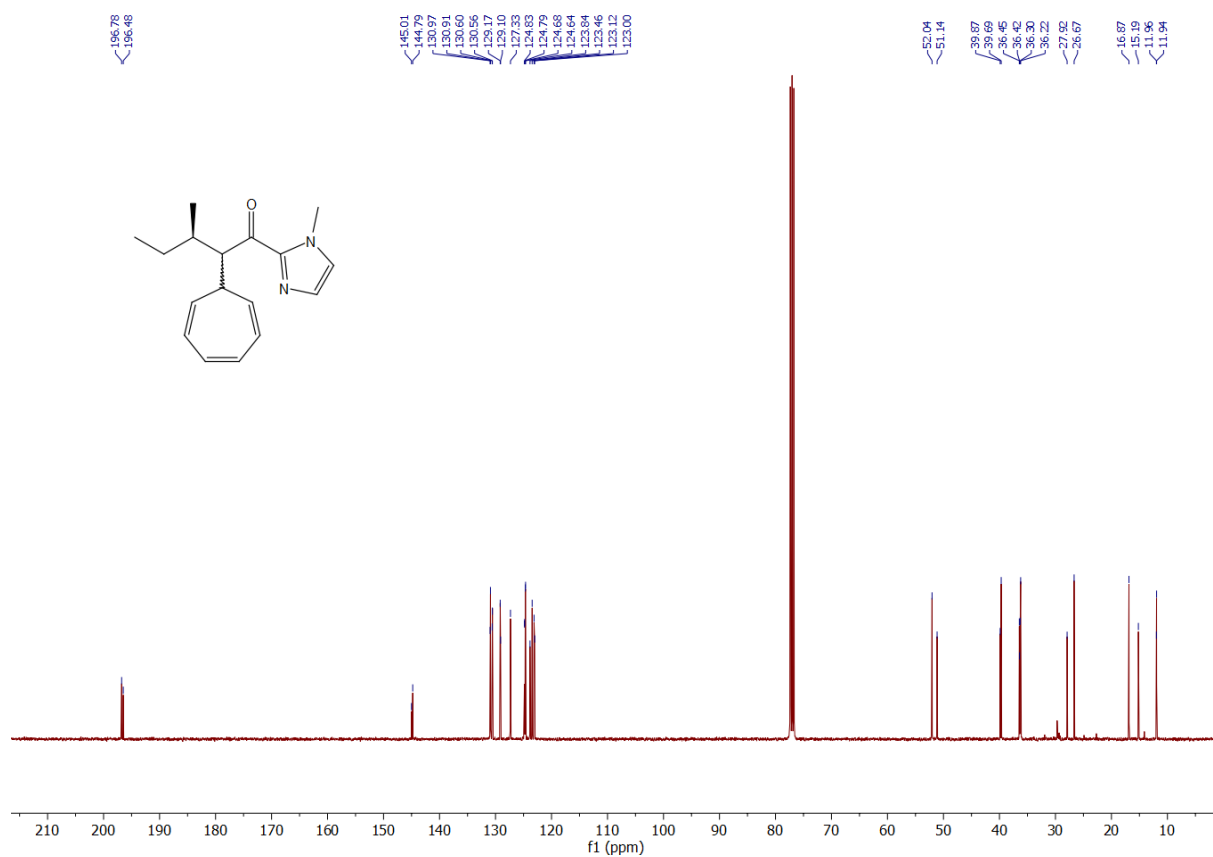

<sup>13</sup>C NMR spectrum of compound 3b.

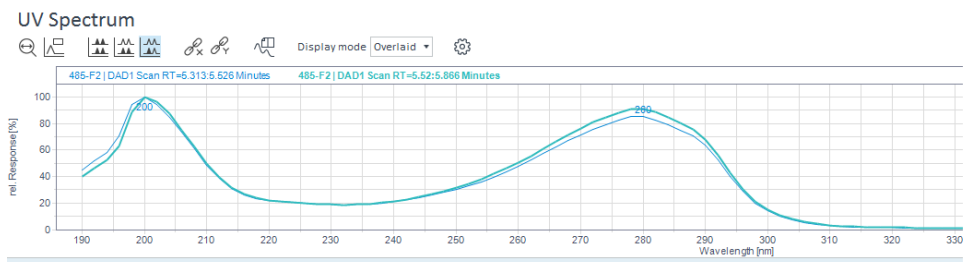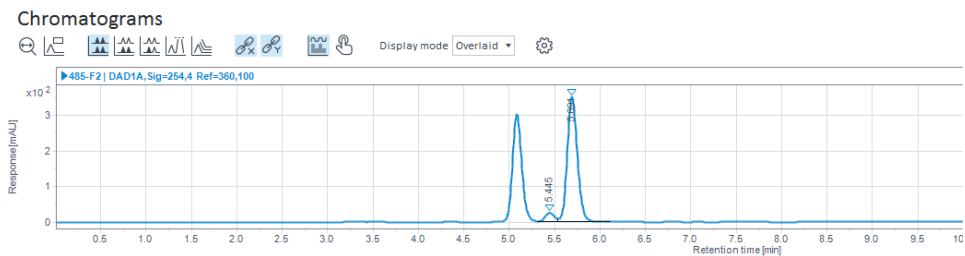

### Injection Results

| Peaks | Summary  |              |        |              |         |
|-------|----------|--------------|--------|--------------|---------|
| #     | RT (min) | Area (mAU·s) | Area%  | Height (mAU) | Height% |
| 1     | 5.445    | 187.034      | 6.447  | 25.866       | 6.86    |
| 2     | 5.691    | 2714.252     | 93.553 | 351.414      | 93.14   |

HPLC chromatogram of compound **3b** (non-racemic).

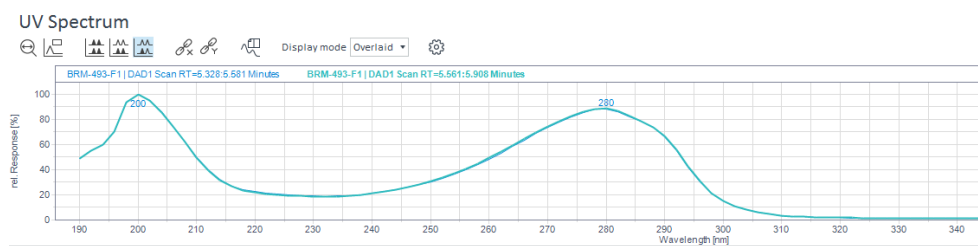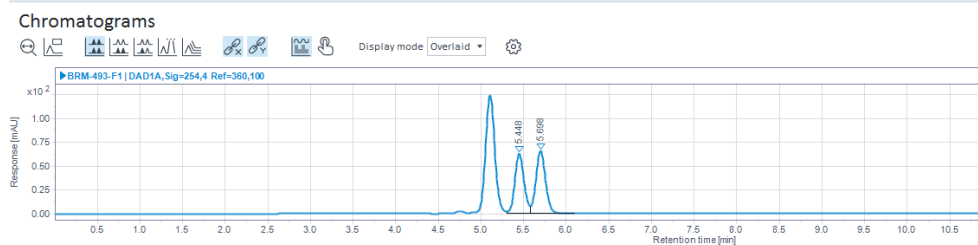

### Injection Results

| Peaks | Summary  |              |        |              |         |
|-------|----------|--------------|--------|--------------|---------|
| #     | RT (min) | Area (mAU·s) | Area%  | Height (mAU) | Height% |
| 1     | 5.448    | 461.563      | 47.573 | 62.405       | 48.76   |
| 2     | 5.698    | 508.650      | 52.427 | 65.579       | 51.24   |

HPLC chromatogram of compound **3b** (racemic).

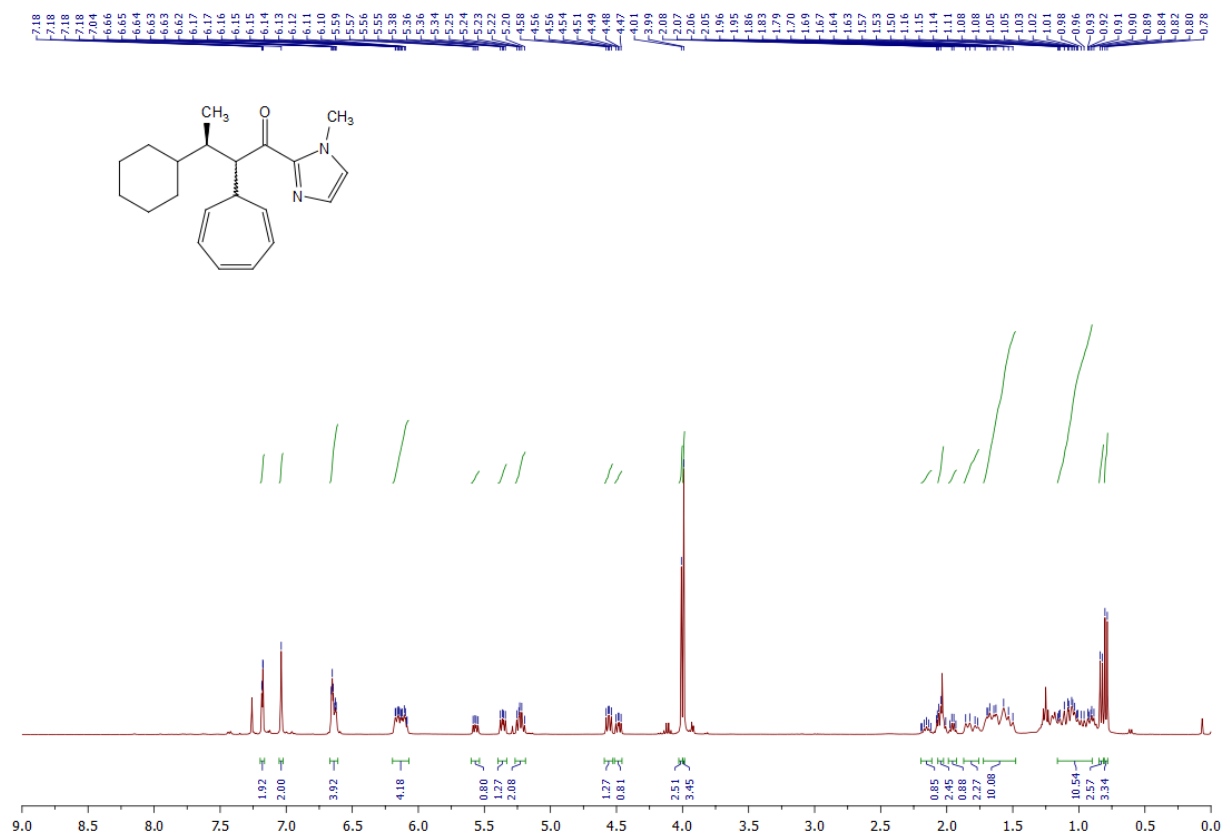

<sup>1</sup>H NMR spectrum of compound **3c**.

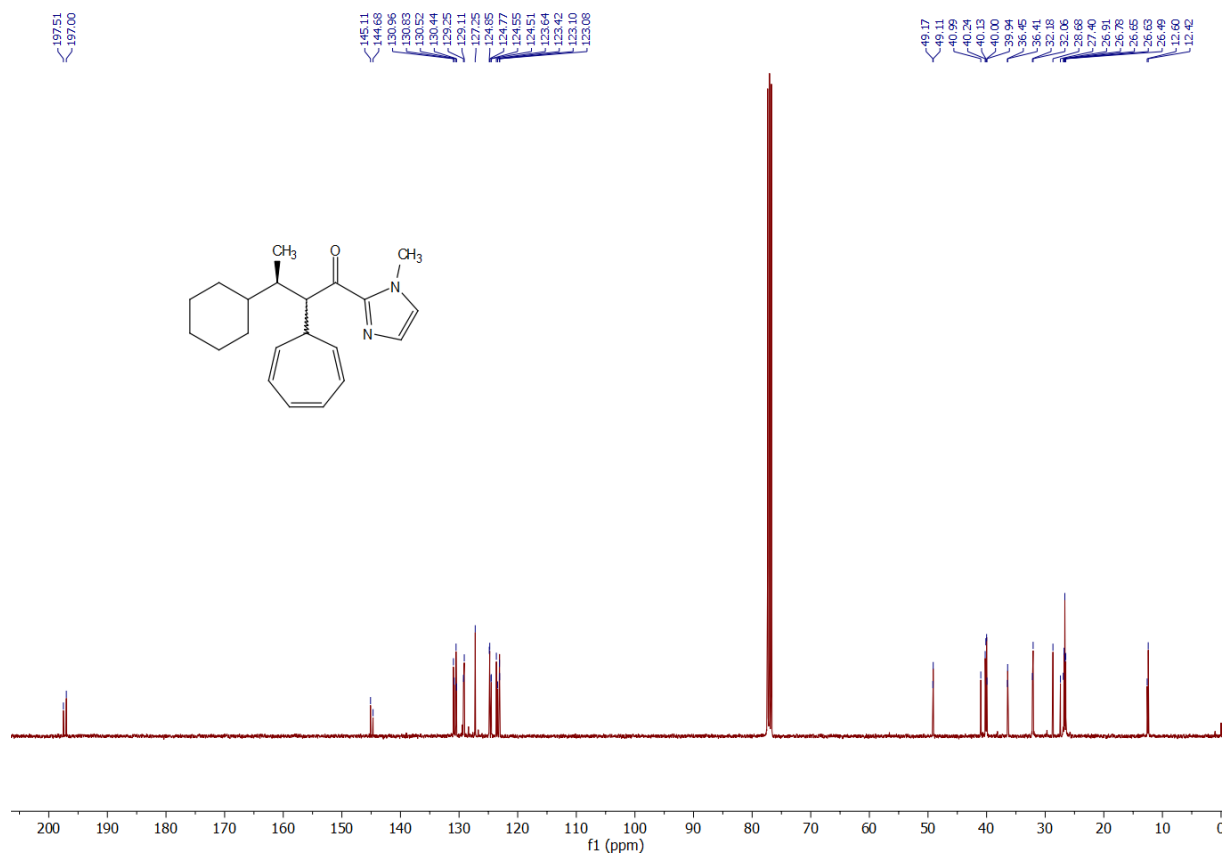

<sup>13</sup>C NMR spectrum of compound **3c**.

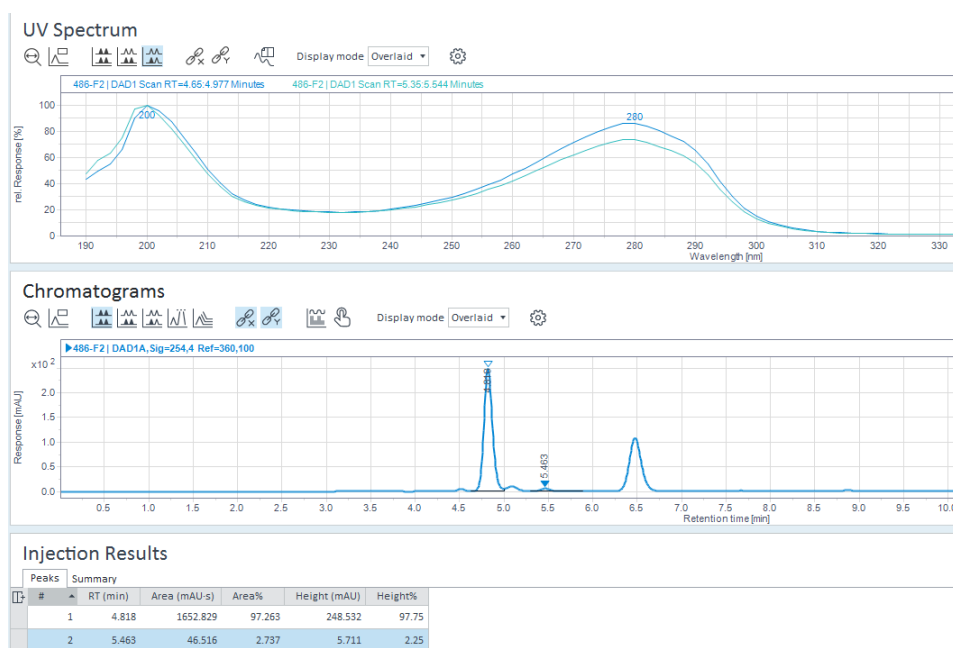

HPLC chromatogram of compound **3c** (non-racemic).

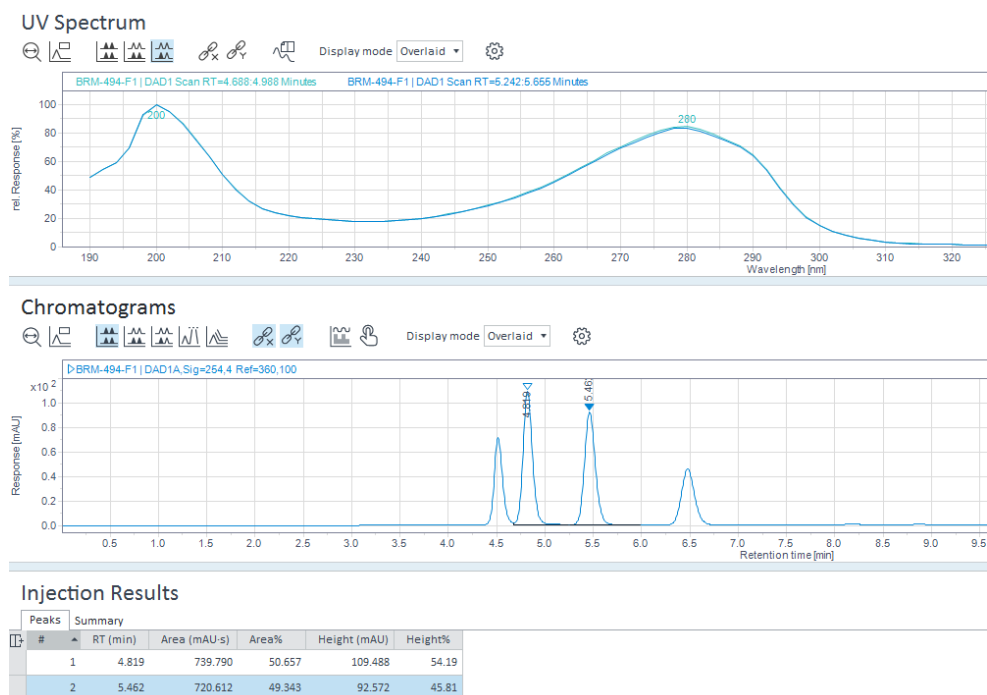

HPLC chromatogram of compound **3c** (racemic).



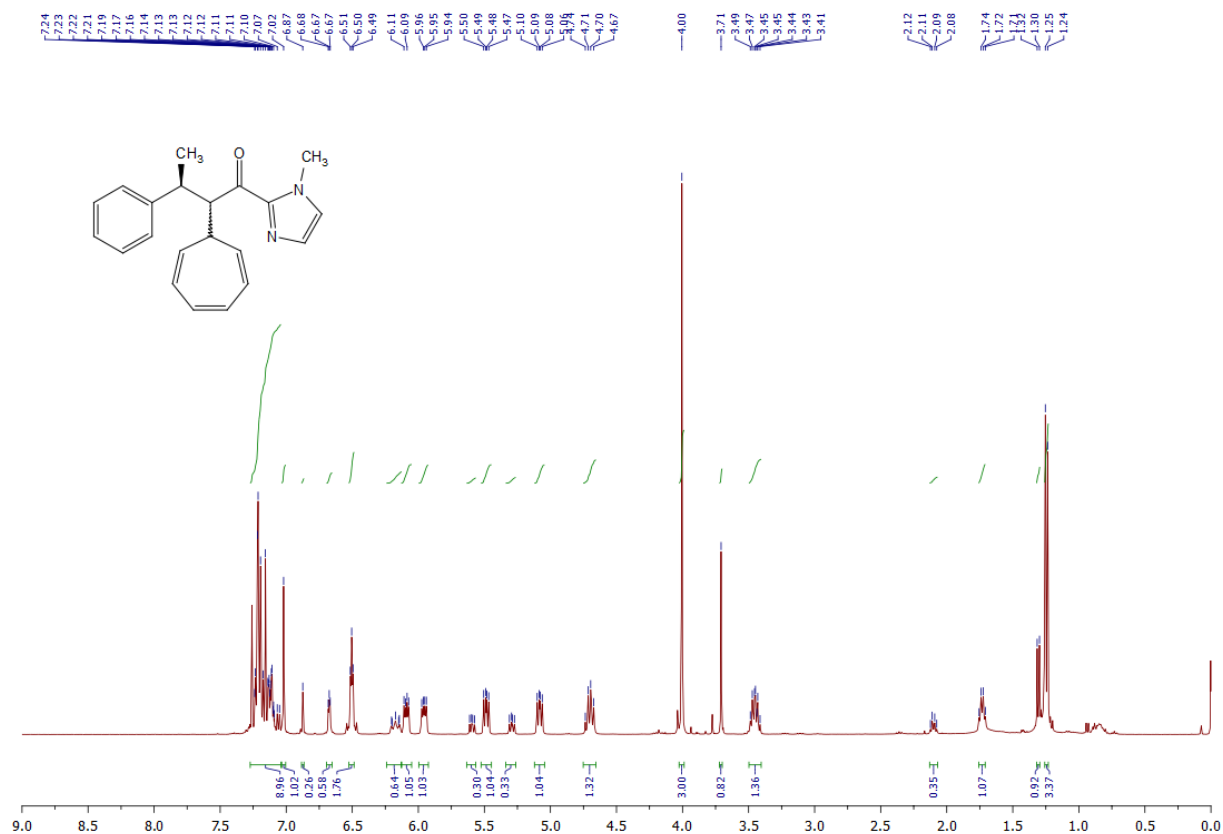

**<sup>1</sup>H NMR spectrum of compound 3d.**

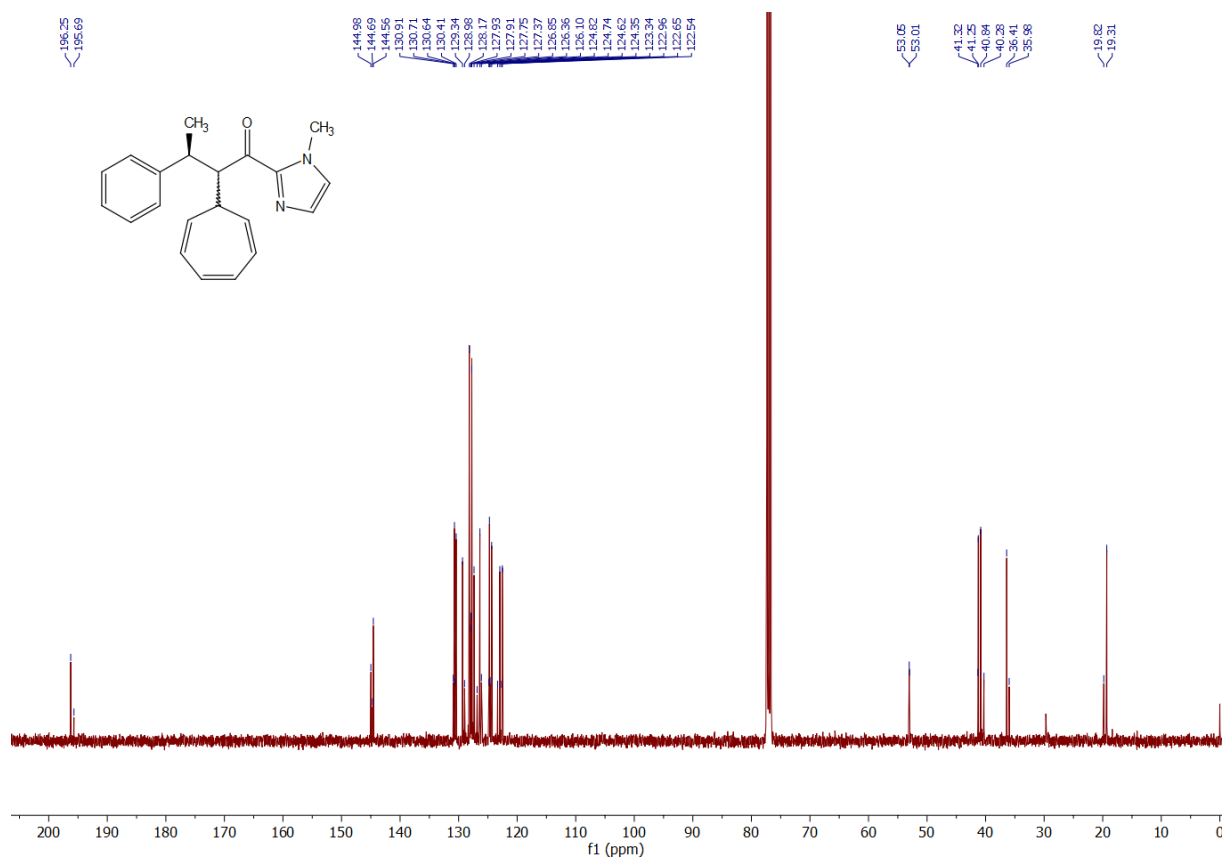

**<sup>13</sup>C NMR spectrum of compound 3d.**

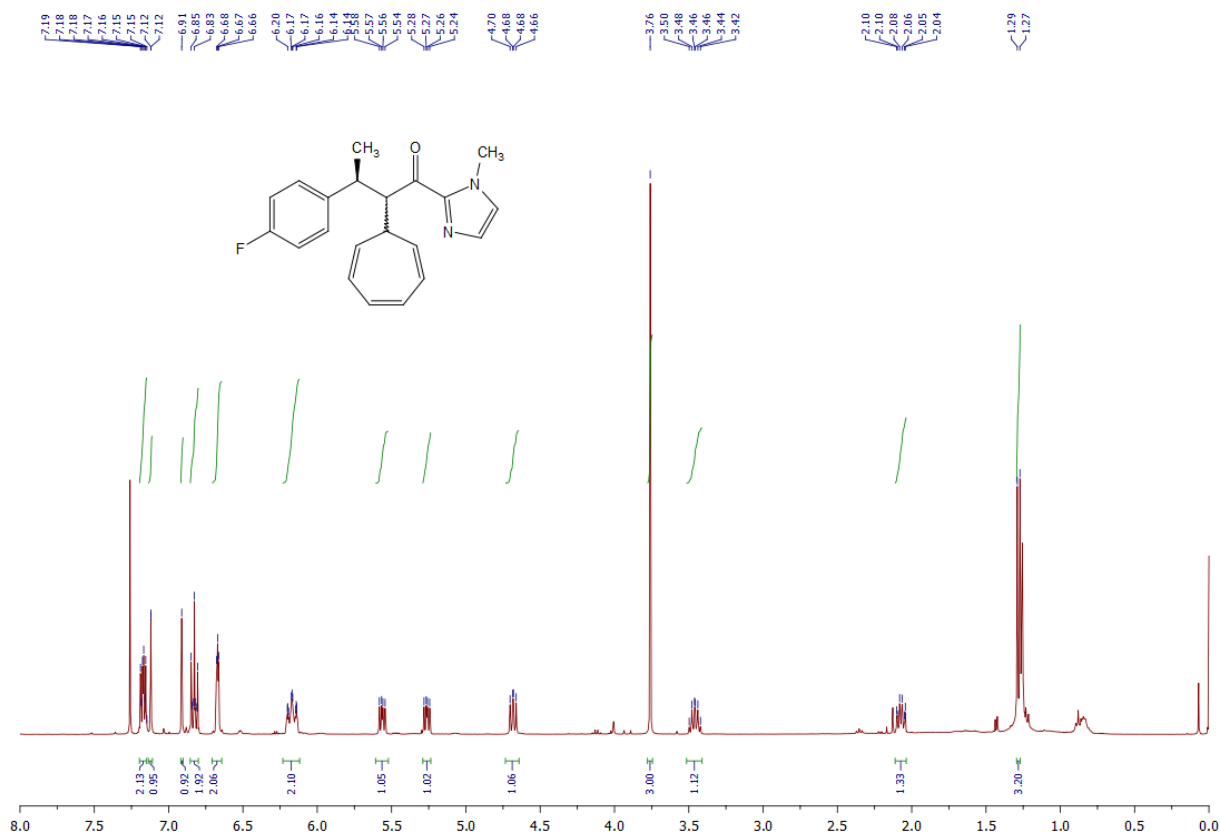

<sup>1</sup>H NMR spectrum of compound 3e (1 diast.).

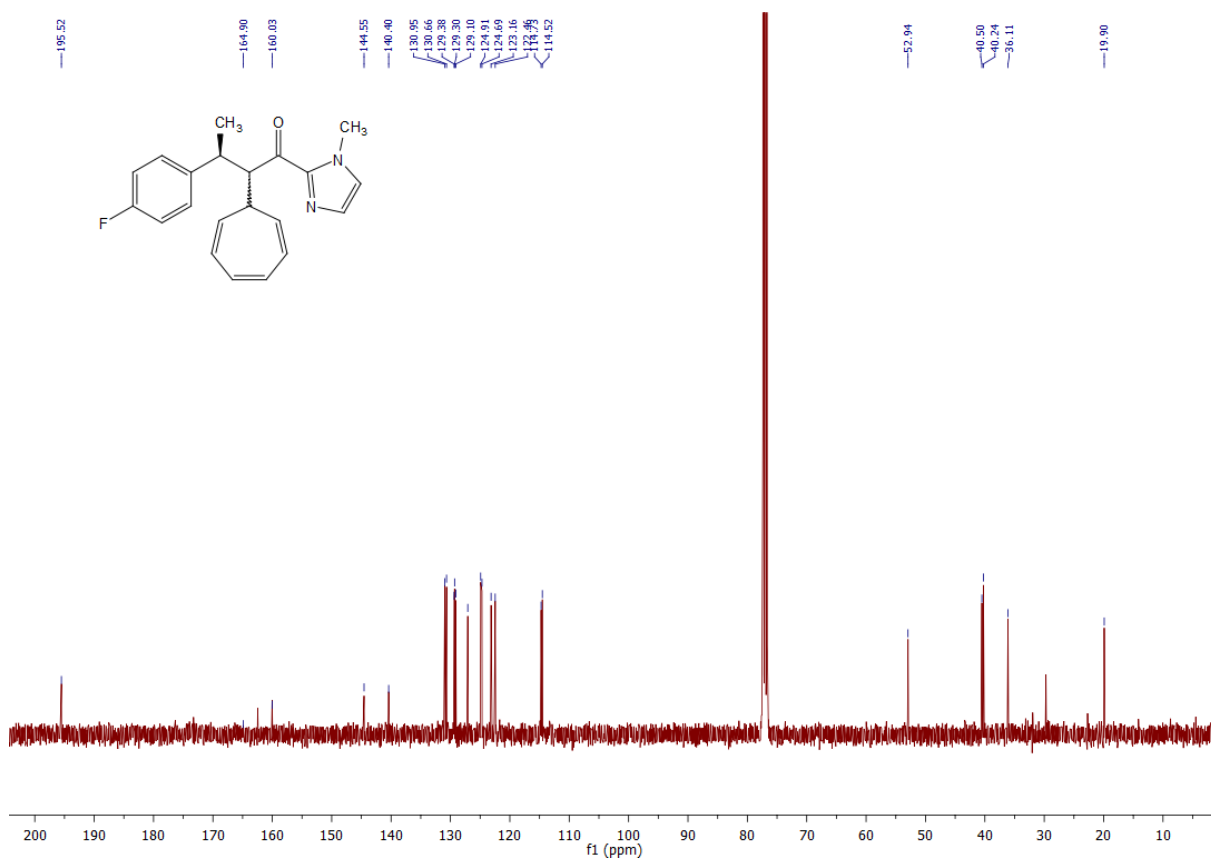

<sup>13</sup>C NMR spectrum of compound 3e (1 diast.).

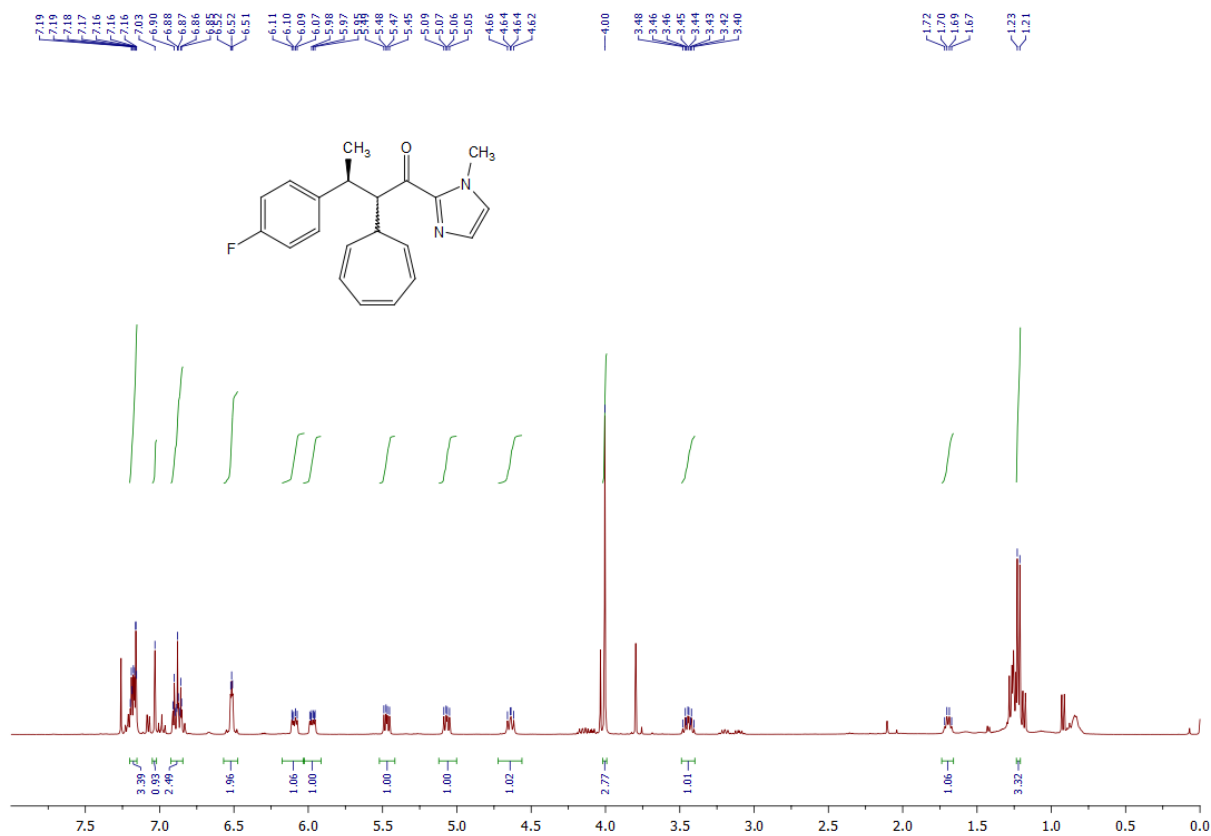

<sup>1</sup>H NMR spectrum of compound 3e (2 diast.).

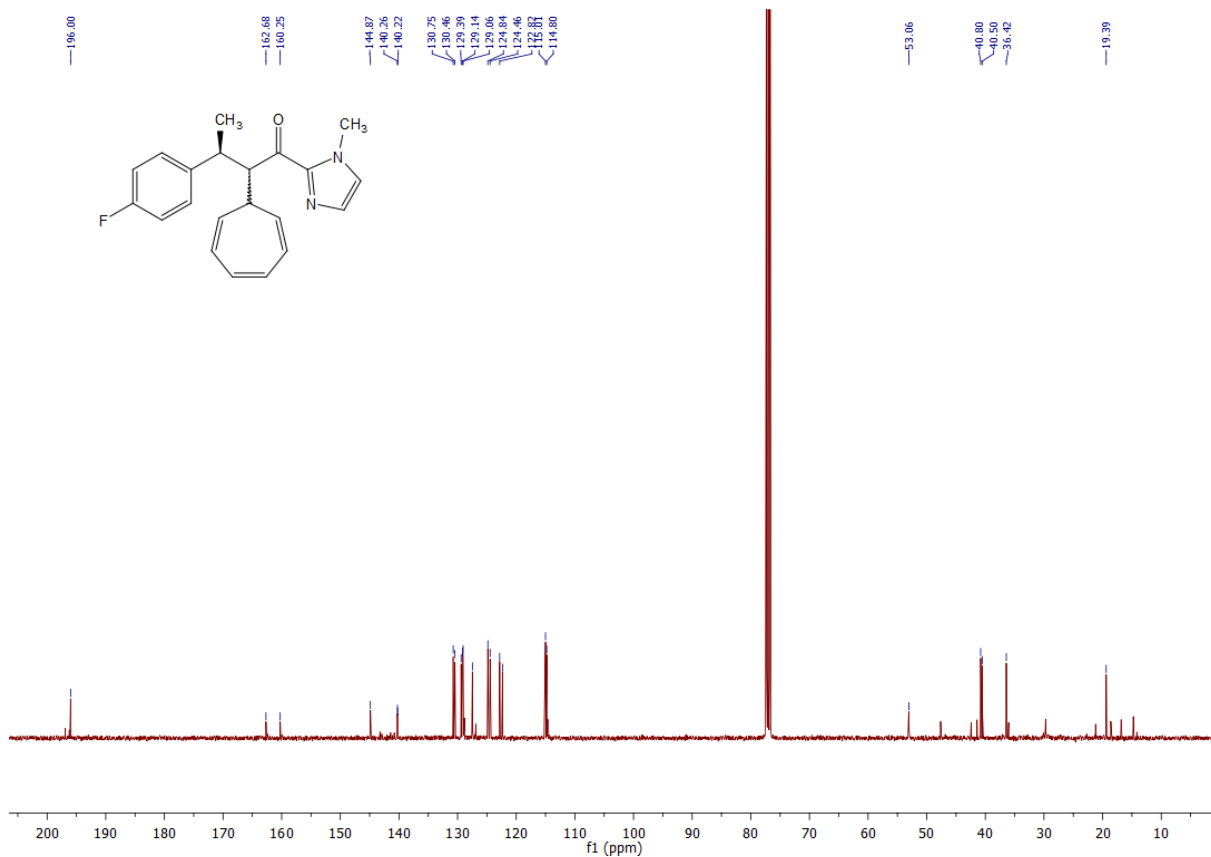

<sup>13</sup>C NMR spectrum of compound 3e (2 diast.).

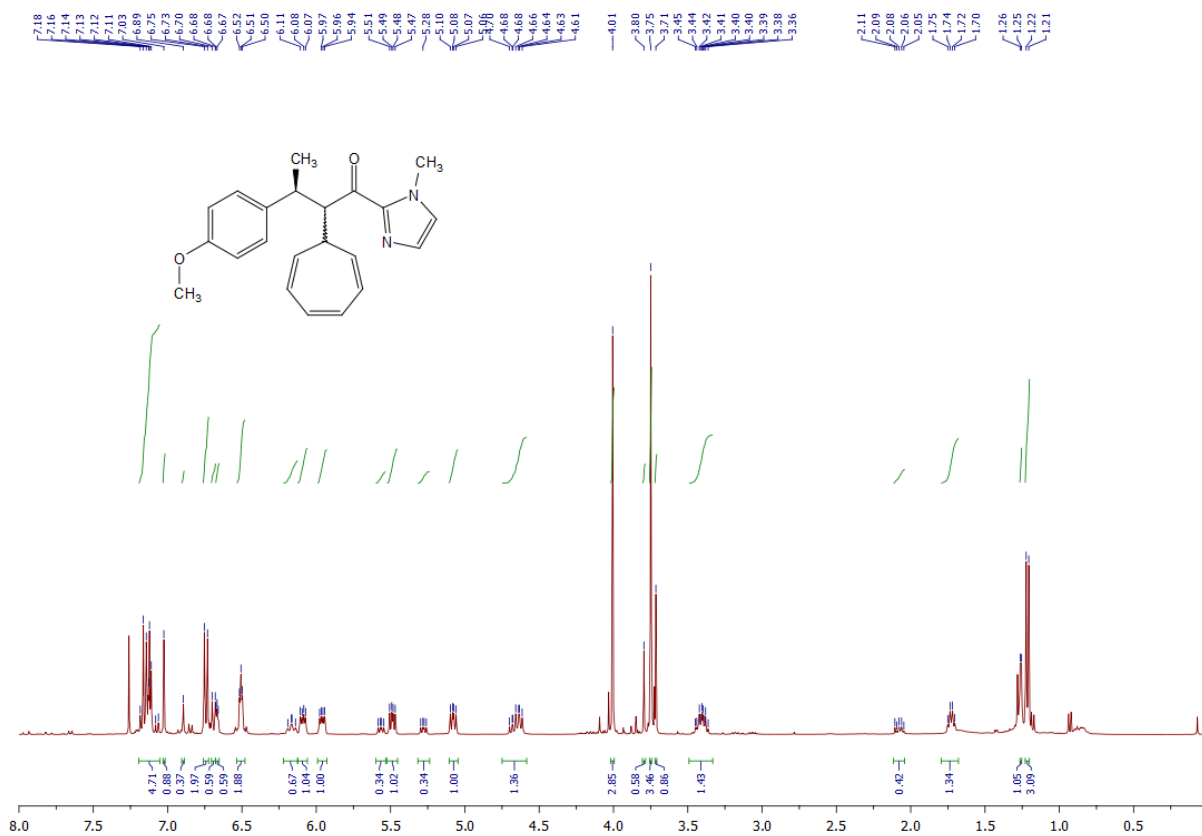

<sup>1</sup>H NMR spectrum of compound 3f.

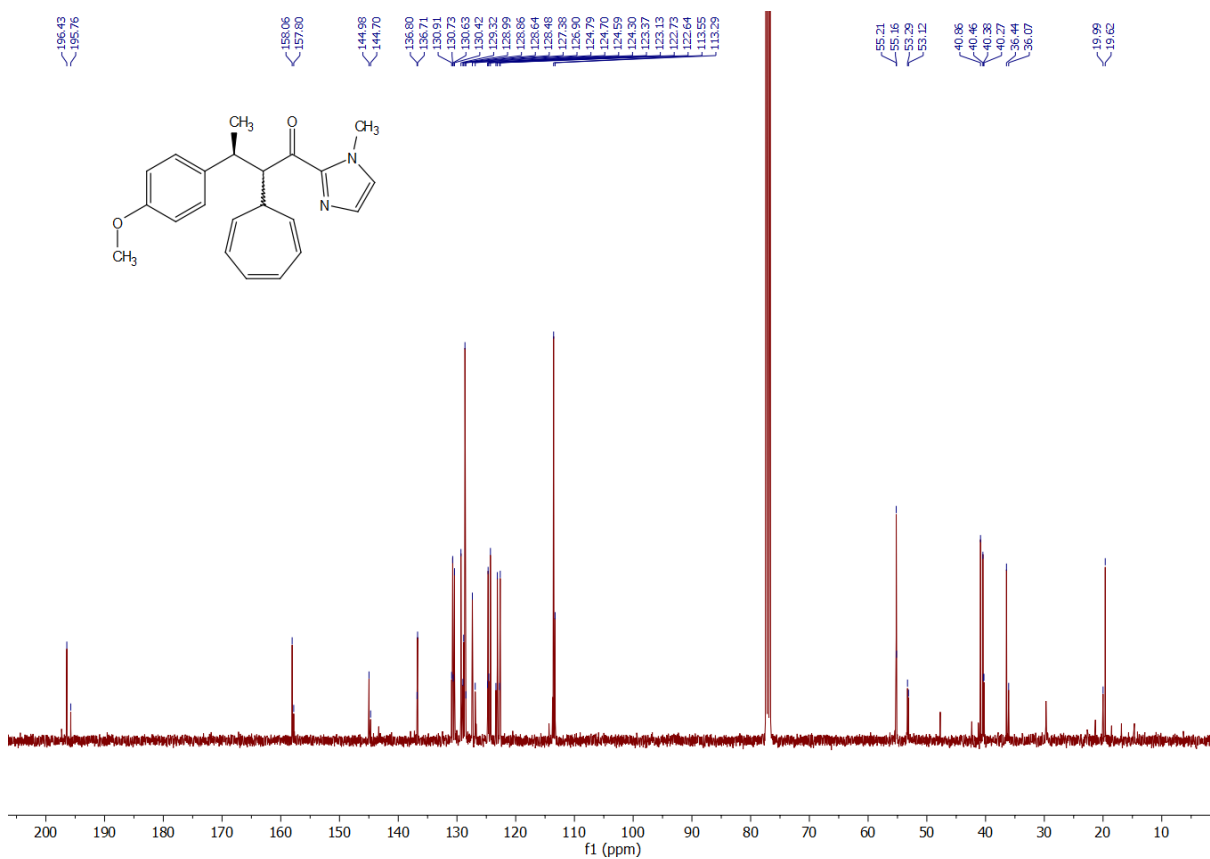

<sup>13</sup>C NMR spectrum of compound 3f.

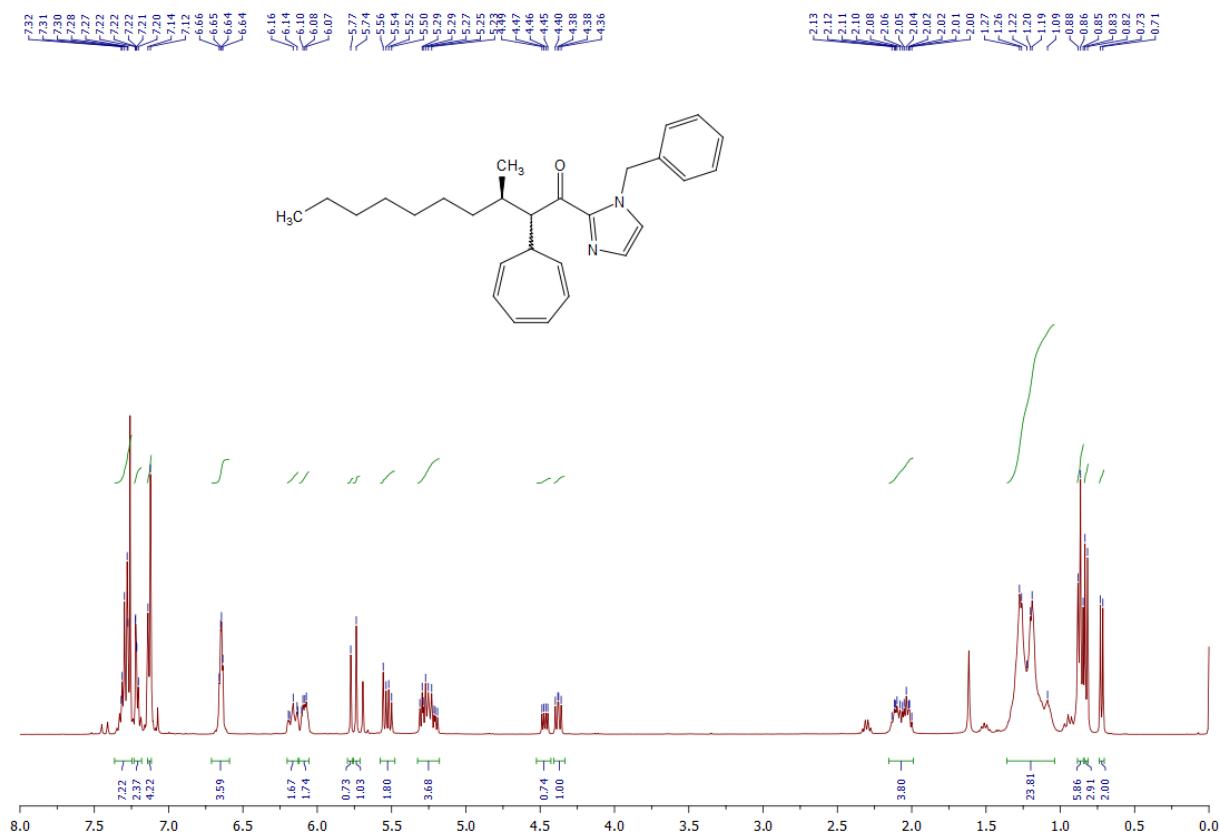

**<sup>1</sup>H NMR spectrum of compound 3g.**

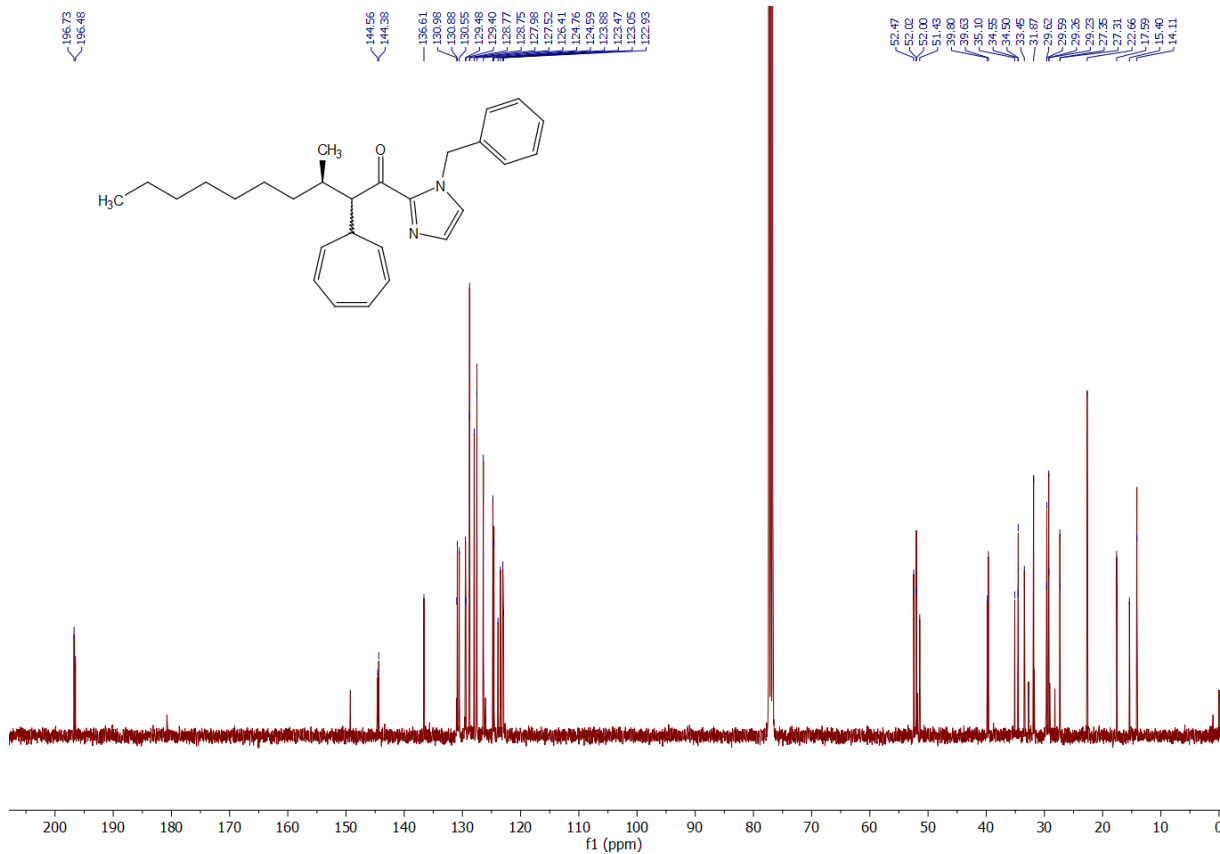

**<sup>13</sup>C NMR spectrum of compound 3g.**

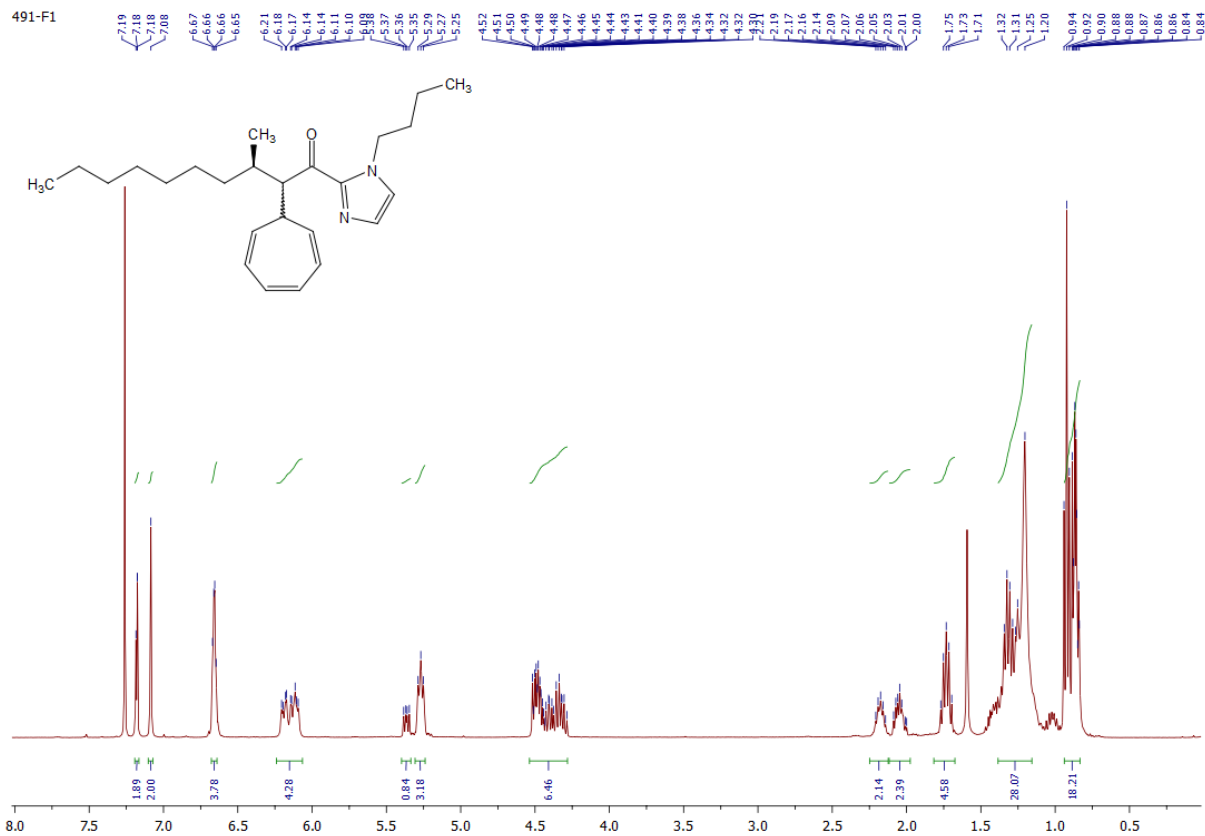

<sup>1</sup>H NMR spectrum of compound **3h**.

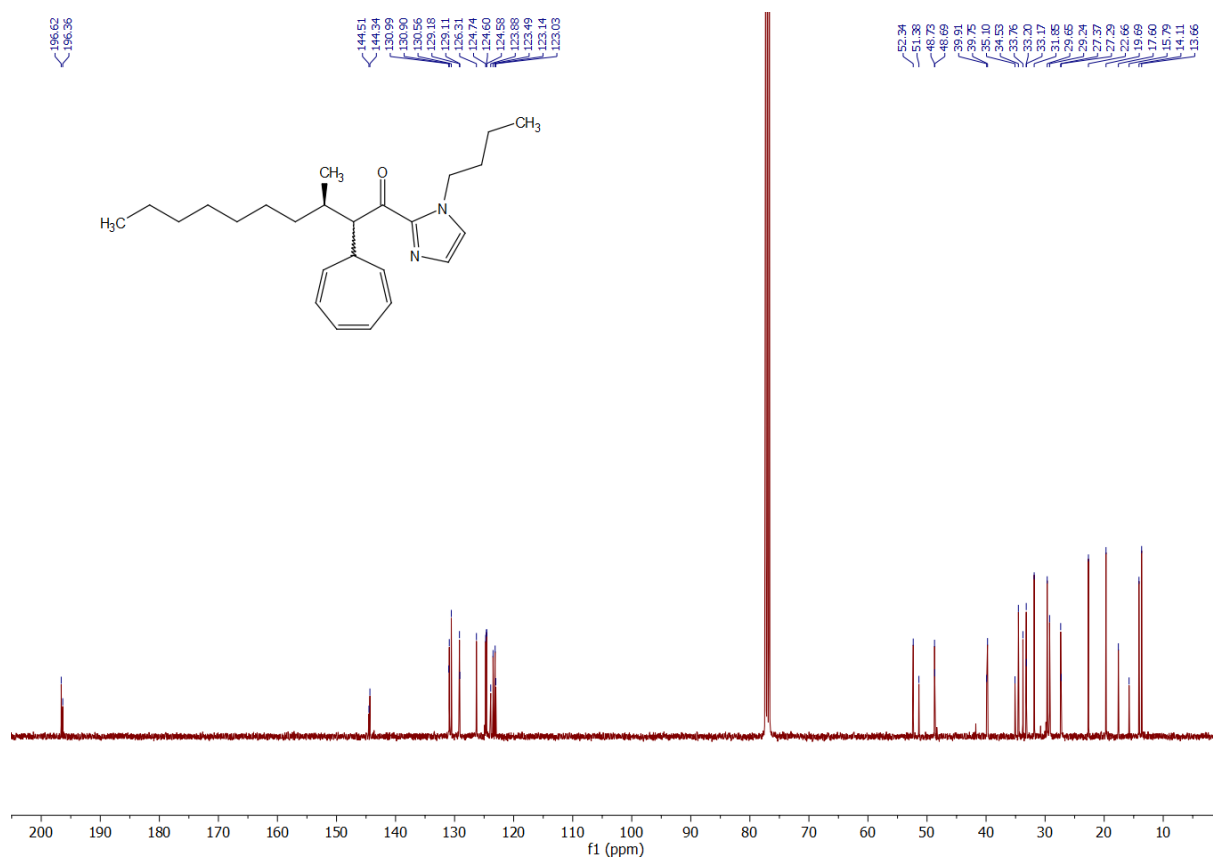

<sup>13</sup>C NMR spectrum of compound **3h**.

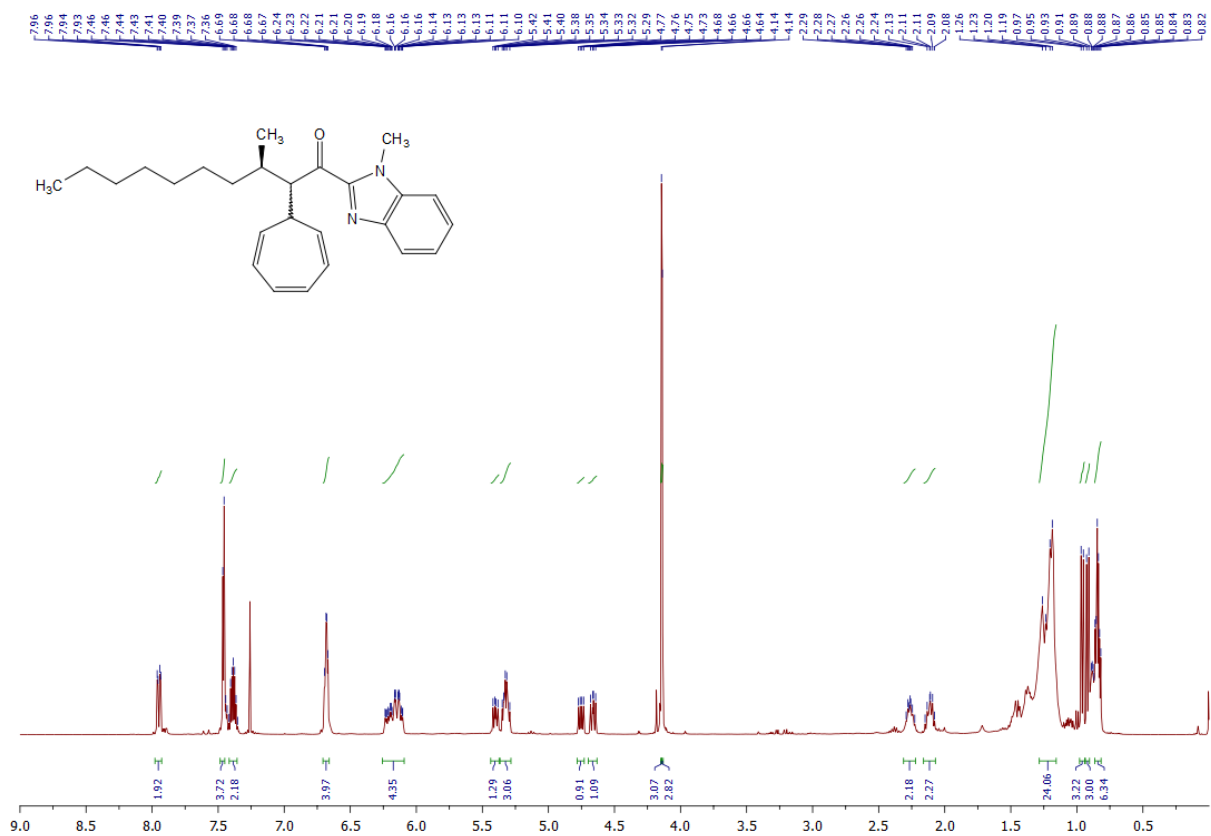

<sup>1</sup>H NMR spectrum of compound **3i**.

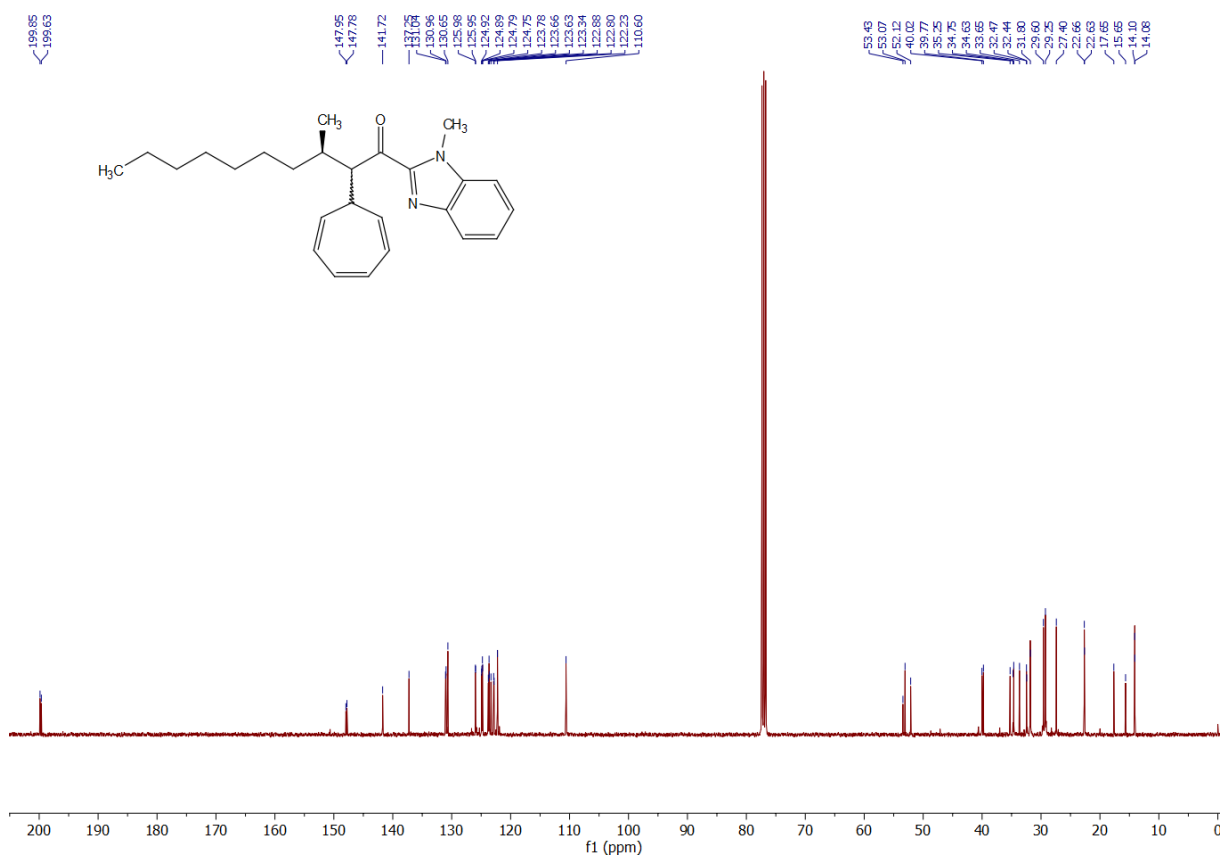

<sup>13</sup>C NMR spectrum of compound **3i**.

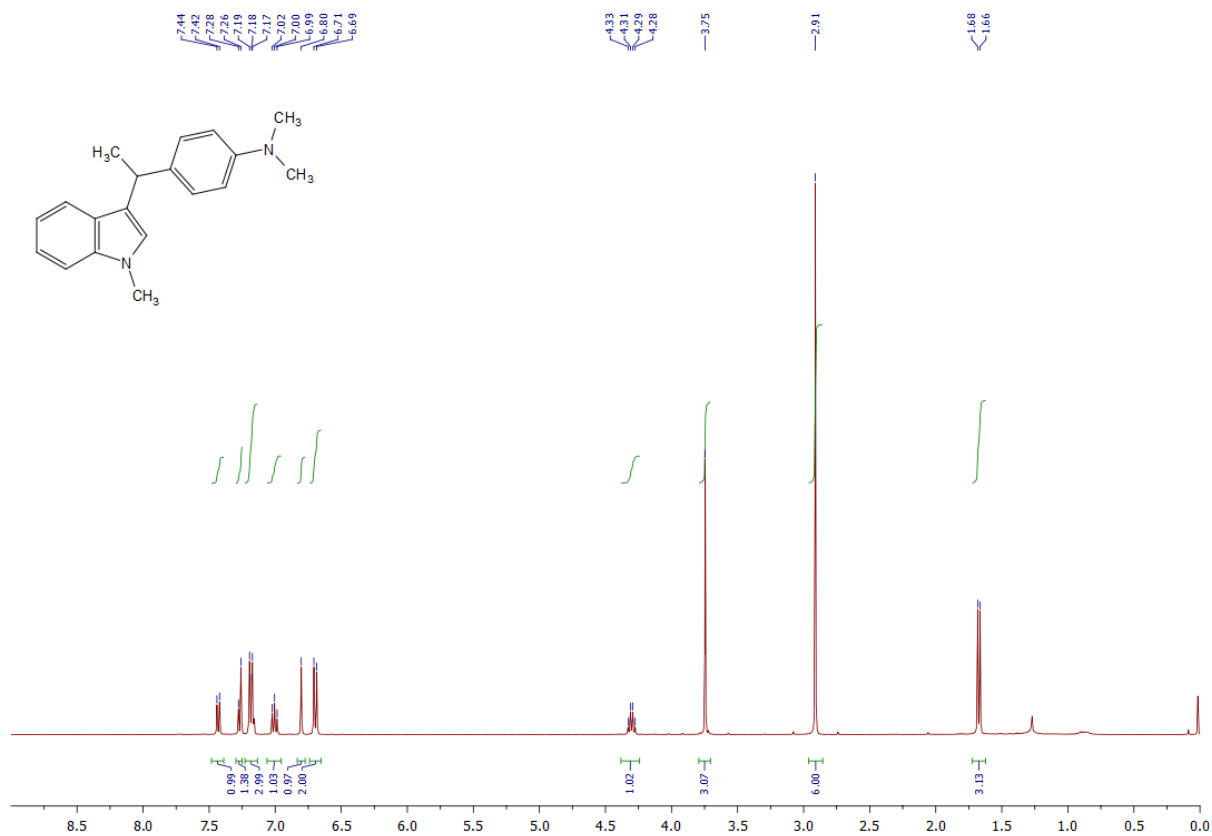

<sup>1</sup>H NMR spectrum of compound S1.

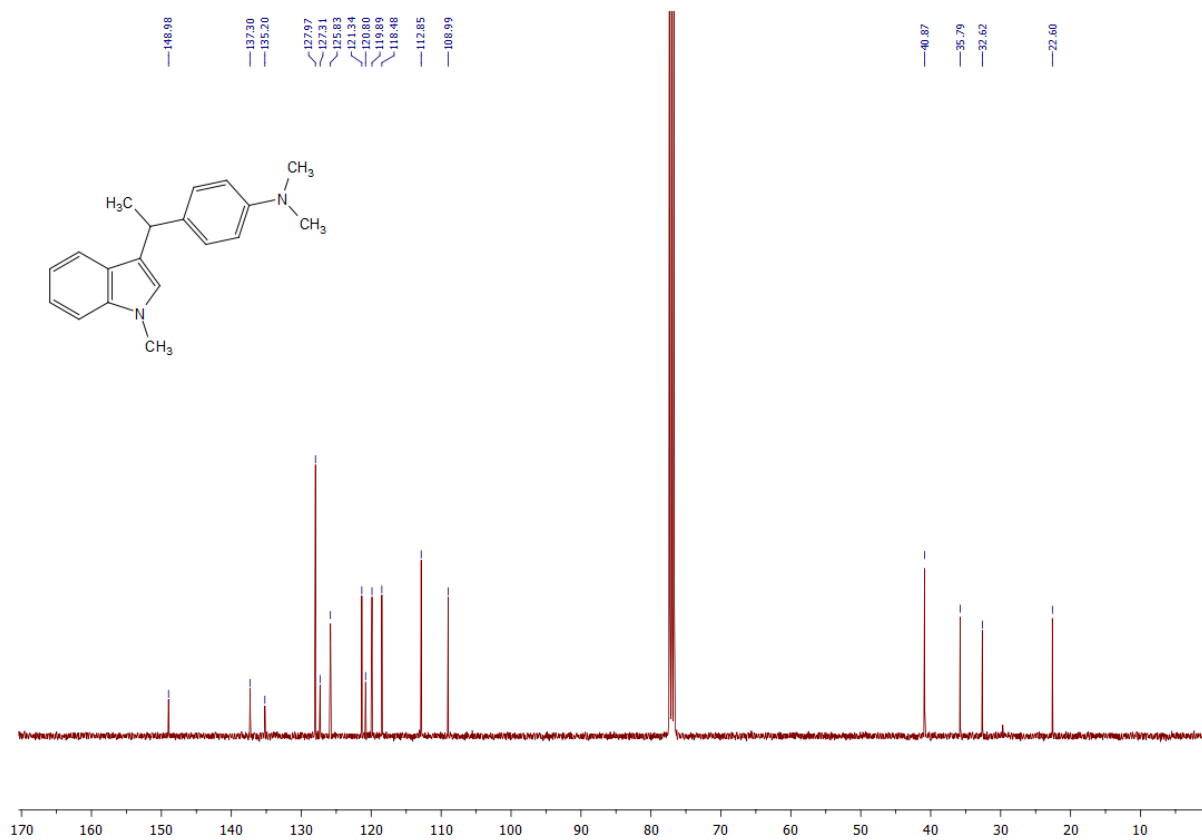

<sup>13</sup>C NMR spectrum of compound S1.



## 6. CD spectra

CD spectra were measured in MeCN solutions.

CD of (*R,R*)-4

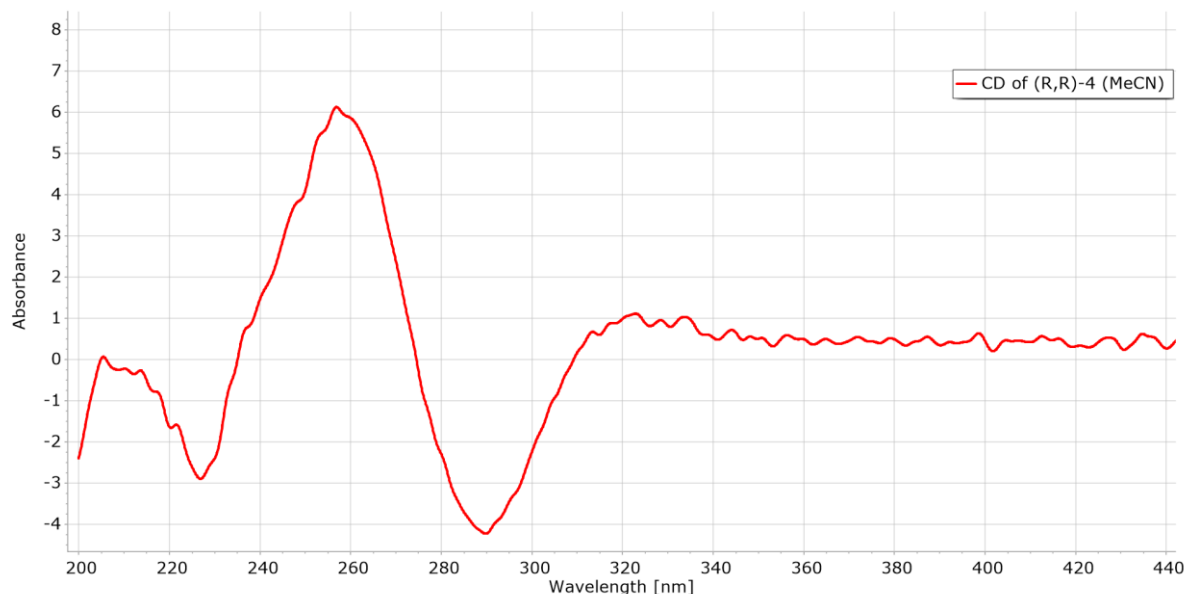

CD of (*S,R*)-4

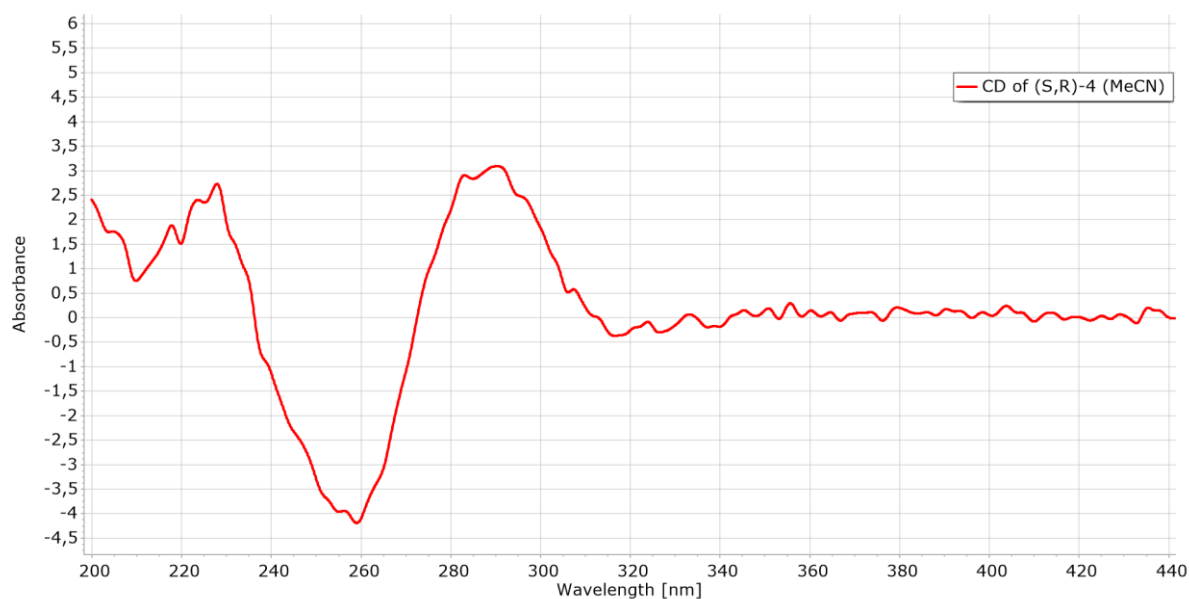

## 7. Details of DFT calculations

General

Initial structures were built and pre-optimized using the semi-empirical RM1 method and HF/3-21G calculations [7]. Conformational analyses were performed using Spartan 18. DFT calculations were realized using the Turbomole program package [8,9]. Geometric optimizations were performed using B3LYP-D3(BJ) [10-14], or PBEh-3c functional [15]. Geometrical optimizations were performed with def2-mSVP or SV(P) basis set [16]. Energies were refined at M06-2X/def2-TZVP [17], or  $\omega$ B97X-D4/def2-TZVPP level [18-20]. CD spectra were calculated by TD DFT calculations using the Tamm-

Dancoff approximation at CAM-B3LYP/def2-TZVP [21], B97-3c/def2-mTZVP [22], and PBE0-D4/def2-SVP [23,24] level in Turbomole program [25,26]. Enolate properties were calculated at  $\omega$ B97X-D4/def2-TZVPP and TZVPPD level.

## Calculations of CD spectra

Calculated spectra for two most populated conformers of (*R,R*)-4

B97-3c/mTZVP (MeCN), conformer 1

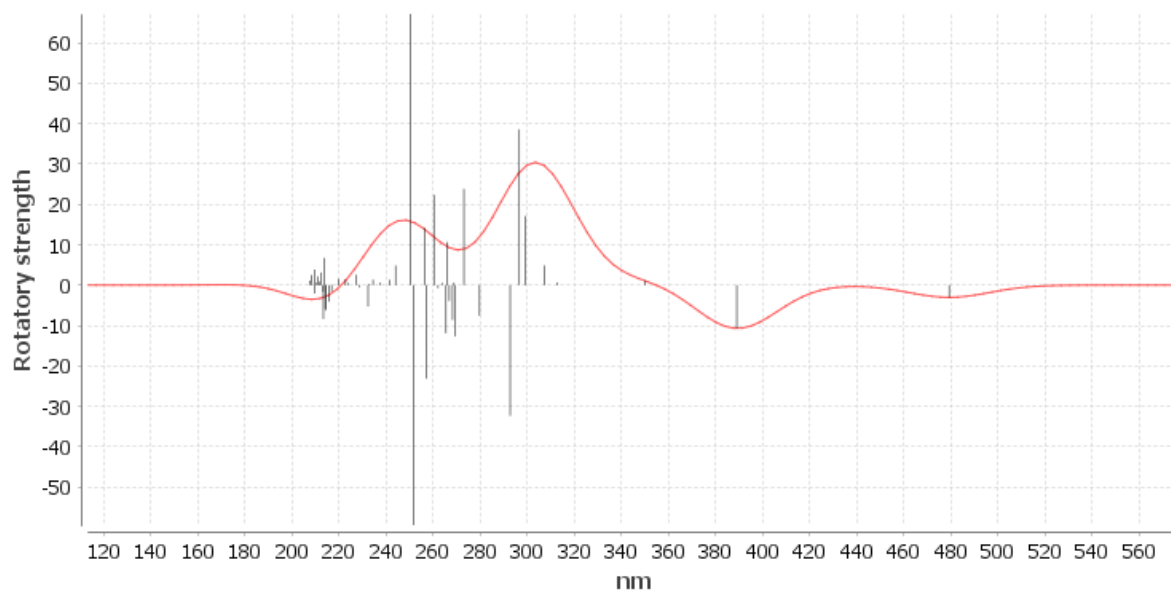

B97-3c/mTZVP (MeCN), conformer 2

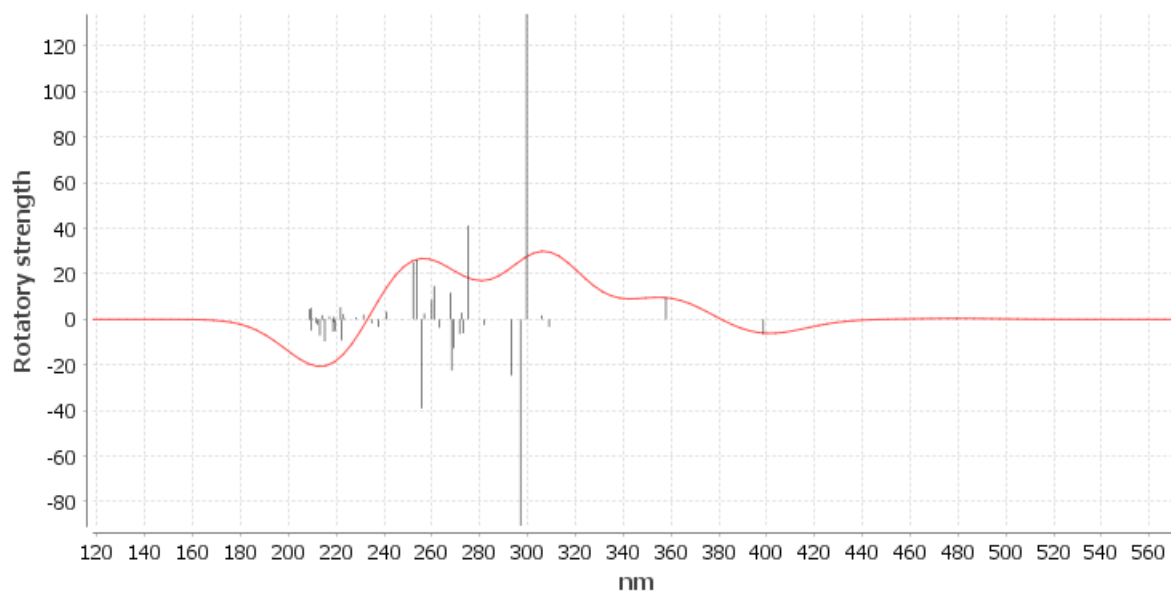

CAM-B3LYP/TZVP, conformer 1

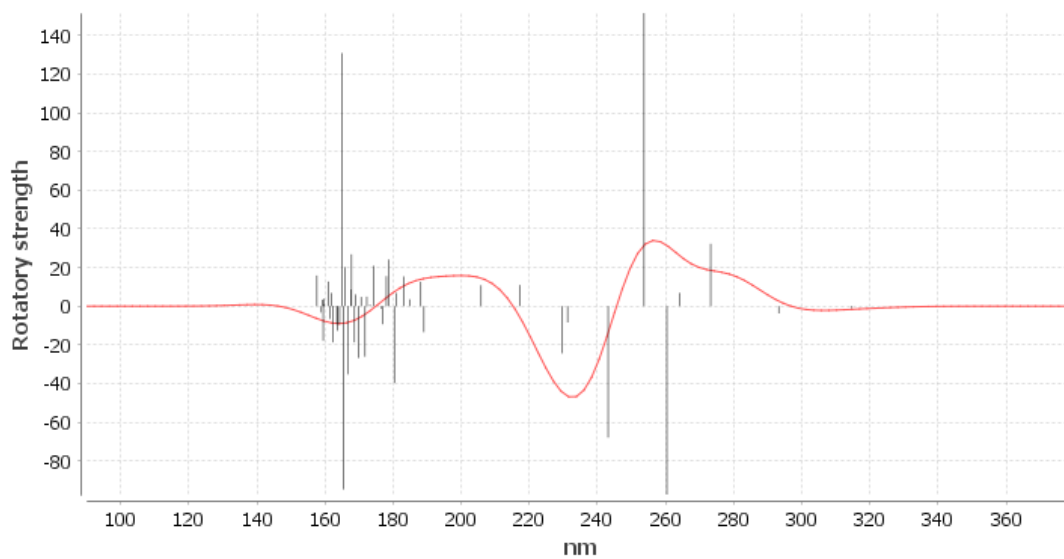

CAM-B3LYP/TZVP, conformer 2

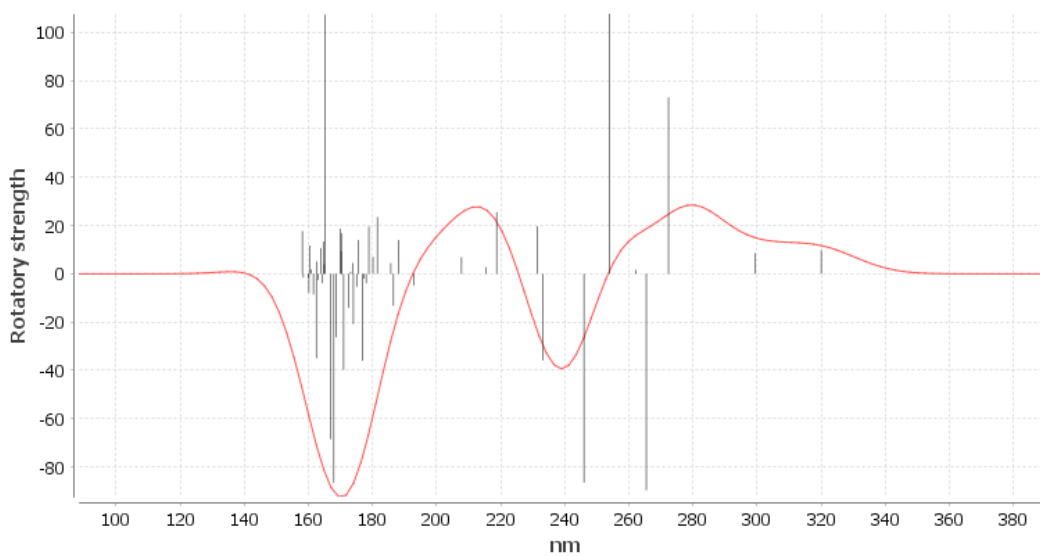

PBE0-D4/SVP (MeCN), conformer 1

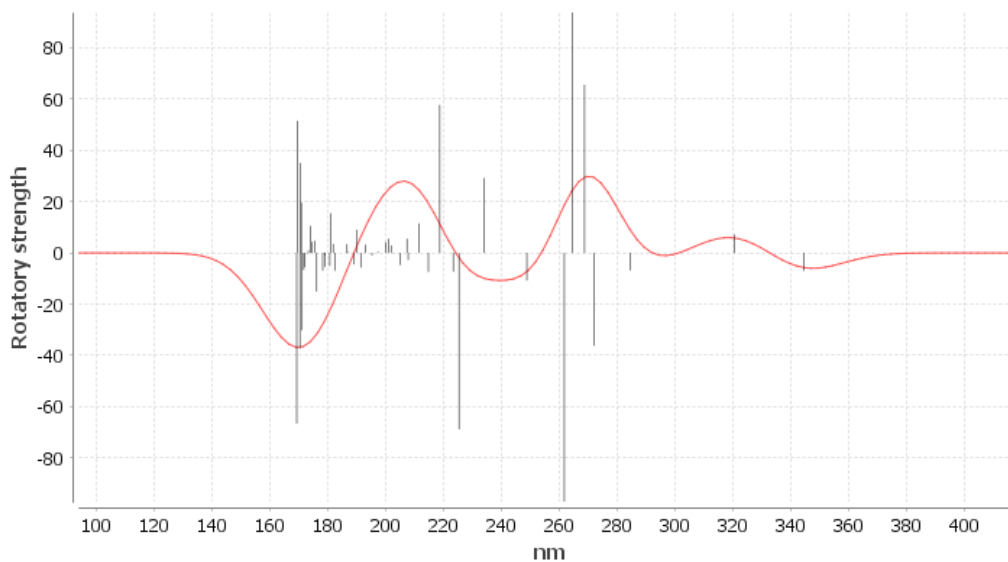

PBE0-D4/SVP (MeCN), conformer 2

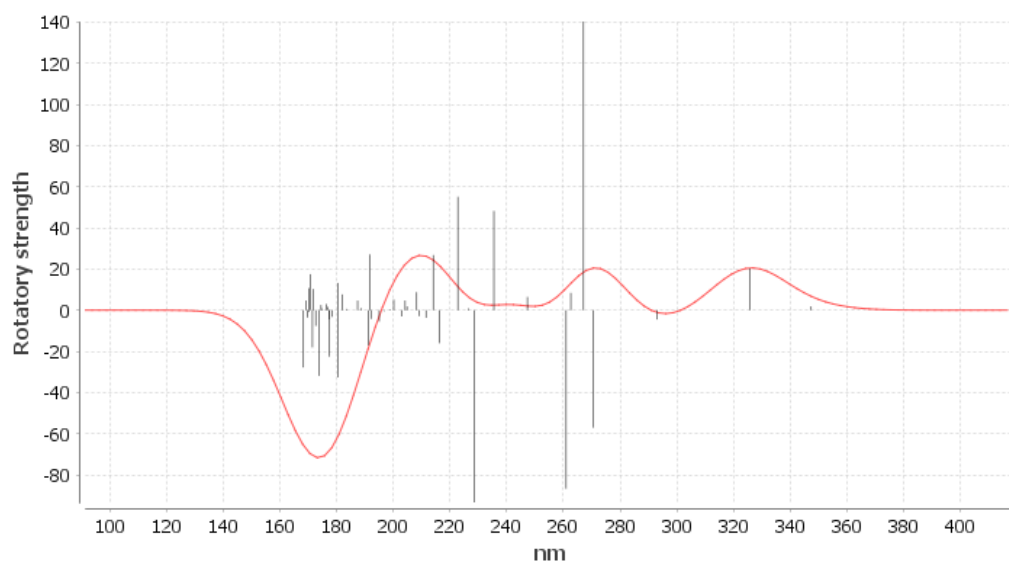

PBE0-D4/SVP, conformer 1

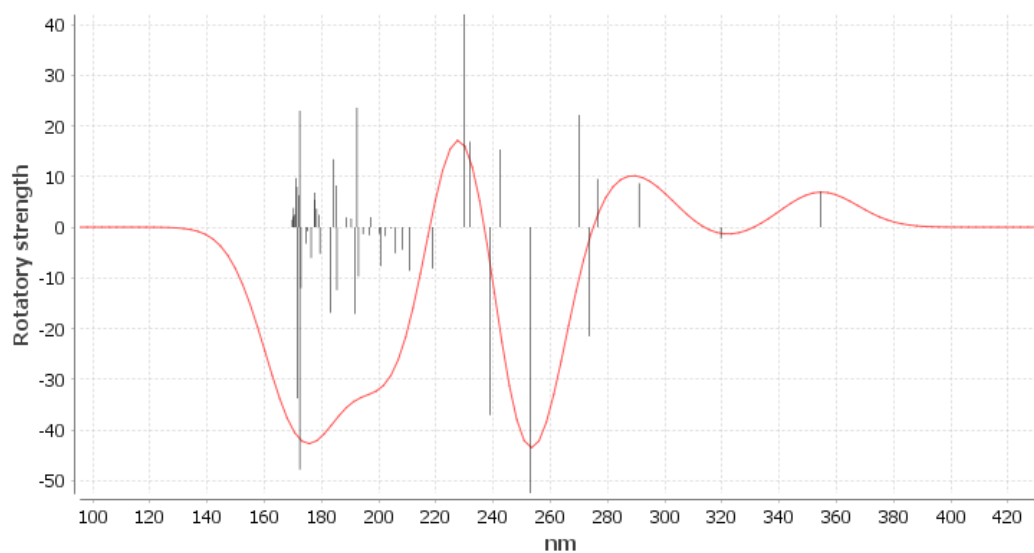

PBE0-D4/SVP, conformer 2

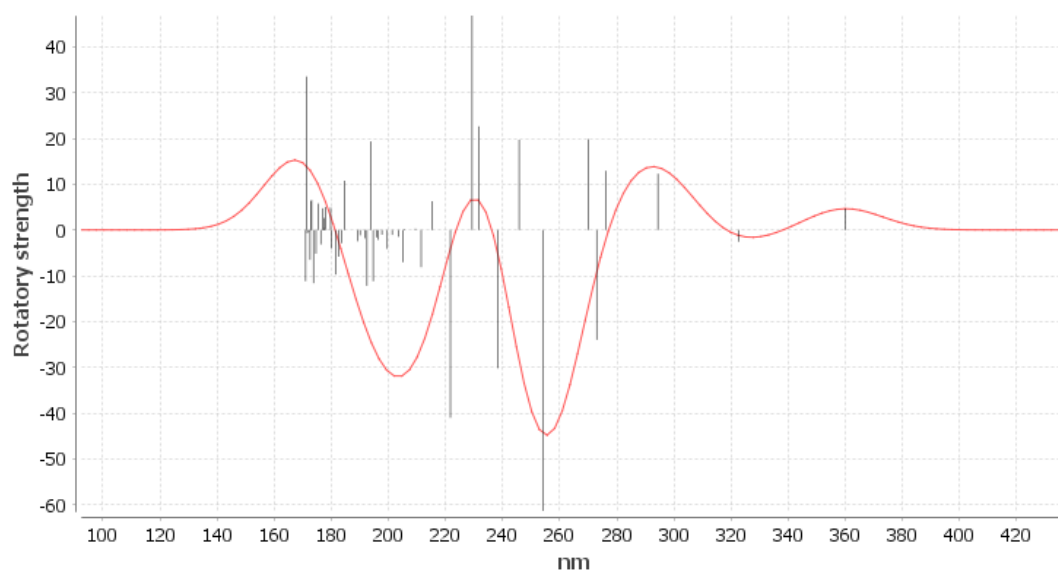

Calculated spectra for two most populated conformers of (*S,R*)-4

B97-3c/mTZVP (MeCN), conformer 1

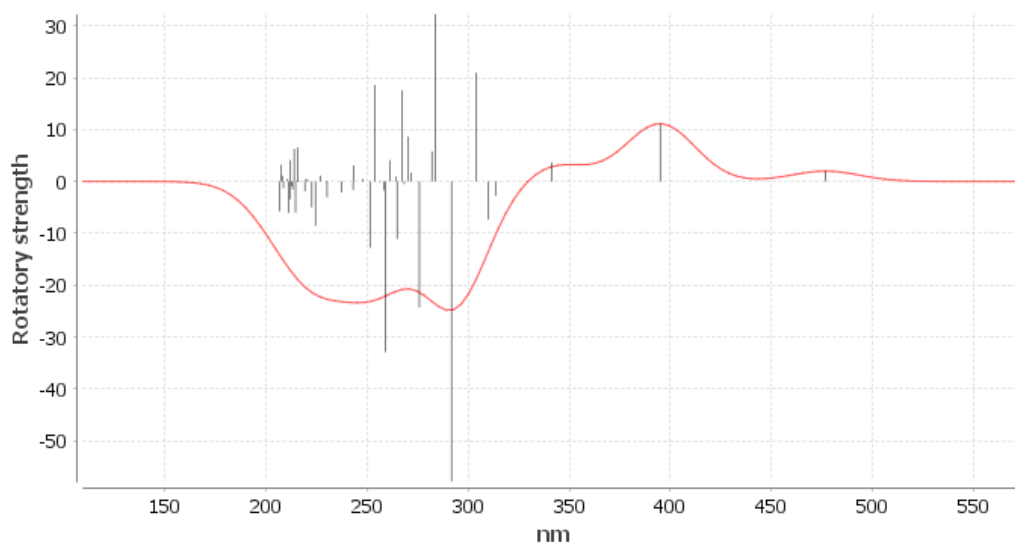

B97-3c/mTZVP (MeCN), conformer 2

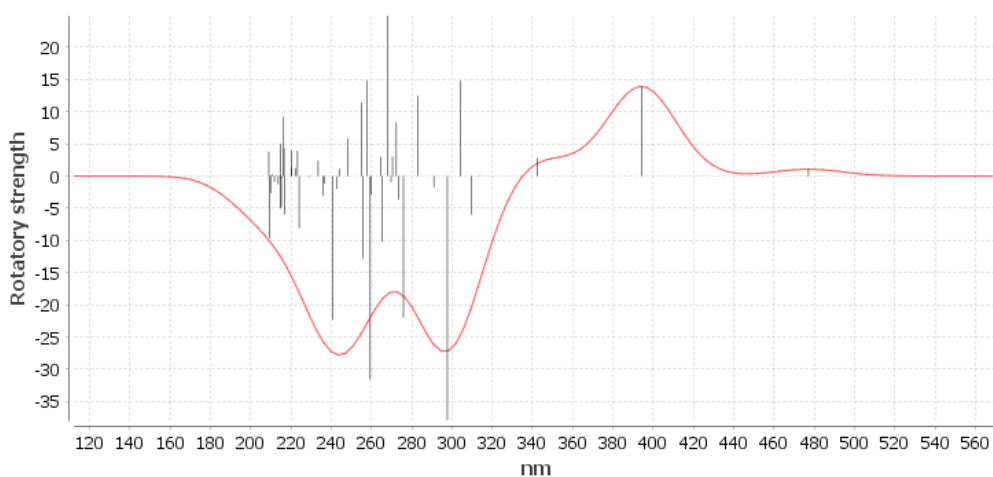

PBE0-D4/SVP (MeCN), conformer 1

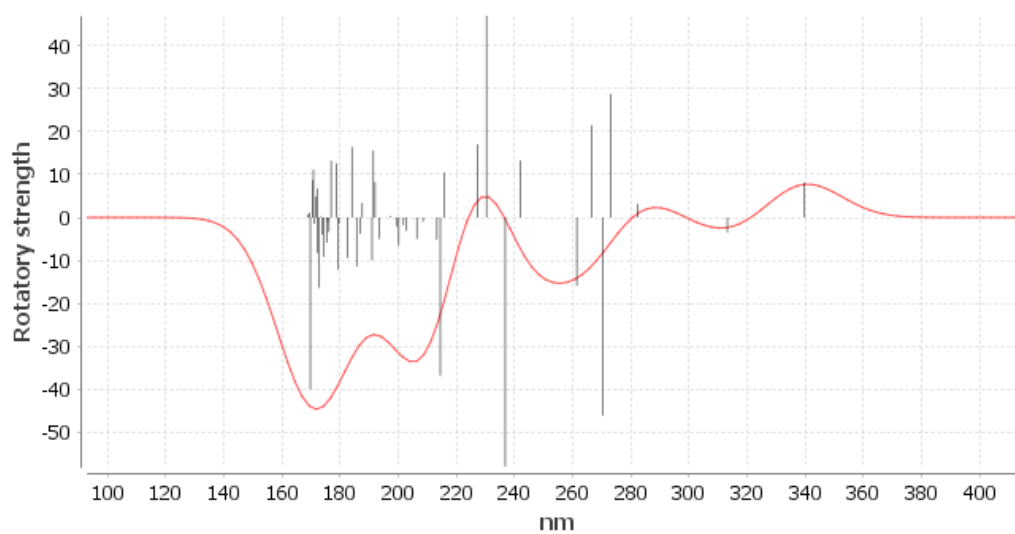

PBE0-D4/SVP (MeCN), conformer 2

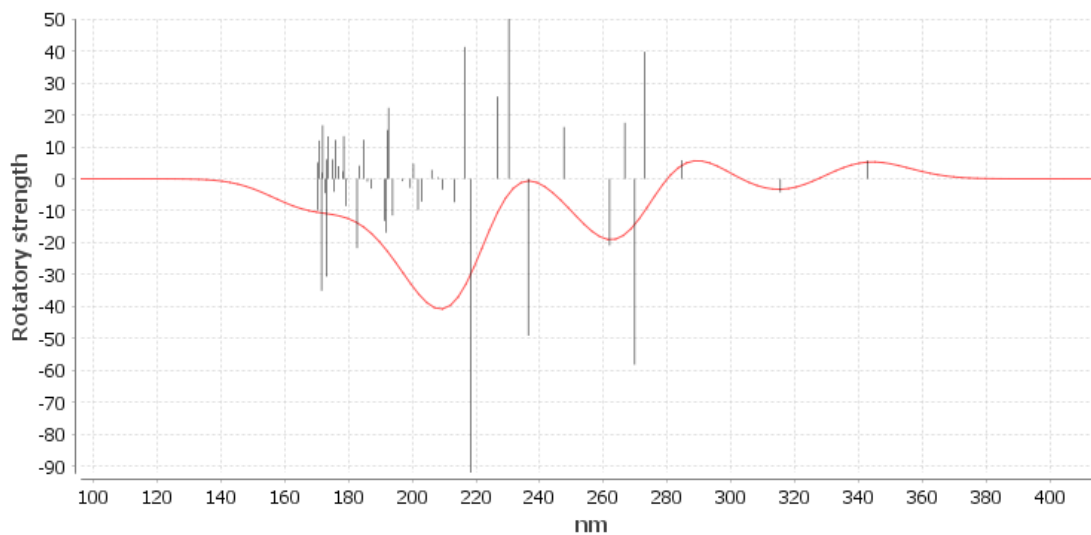

PBE0-D4/SVP, conformer 1

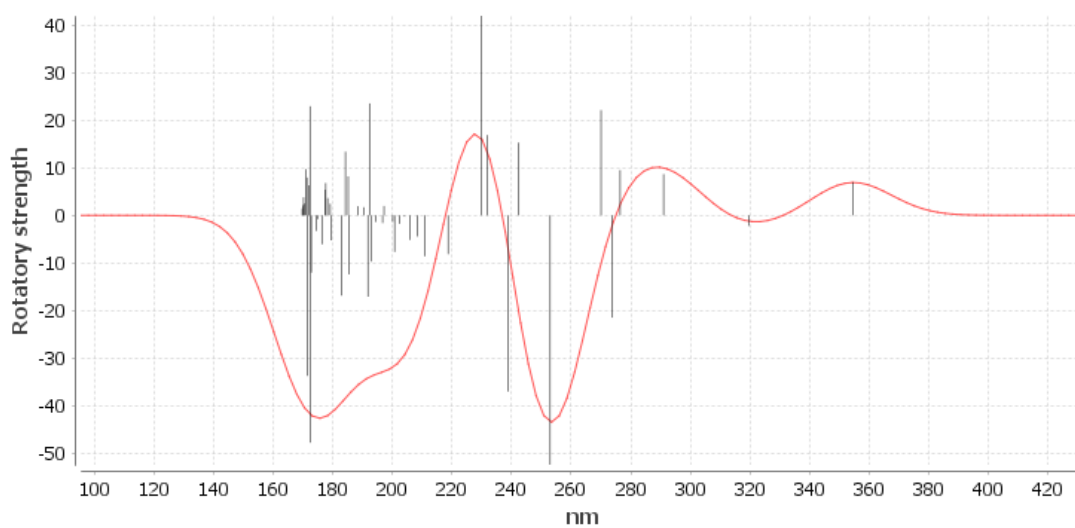

PBE0-D4/SVP, conformer 2

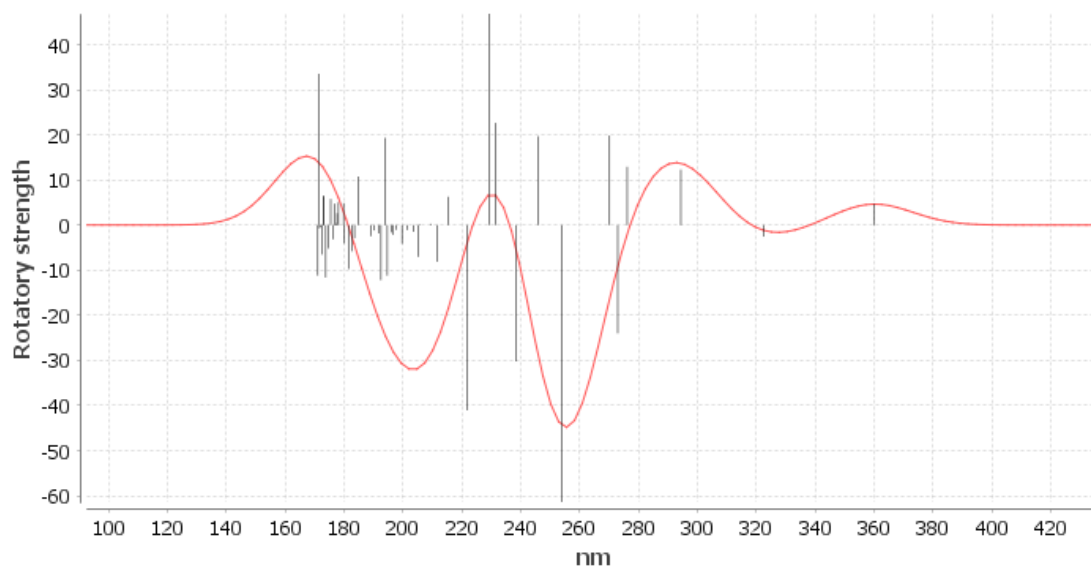

CAM-B3LYP/TZVP, conformer 1

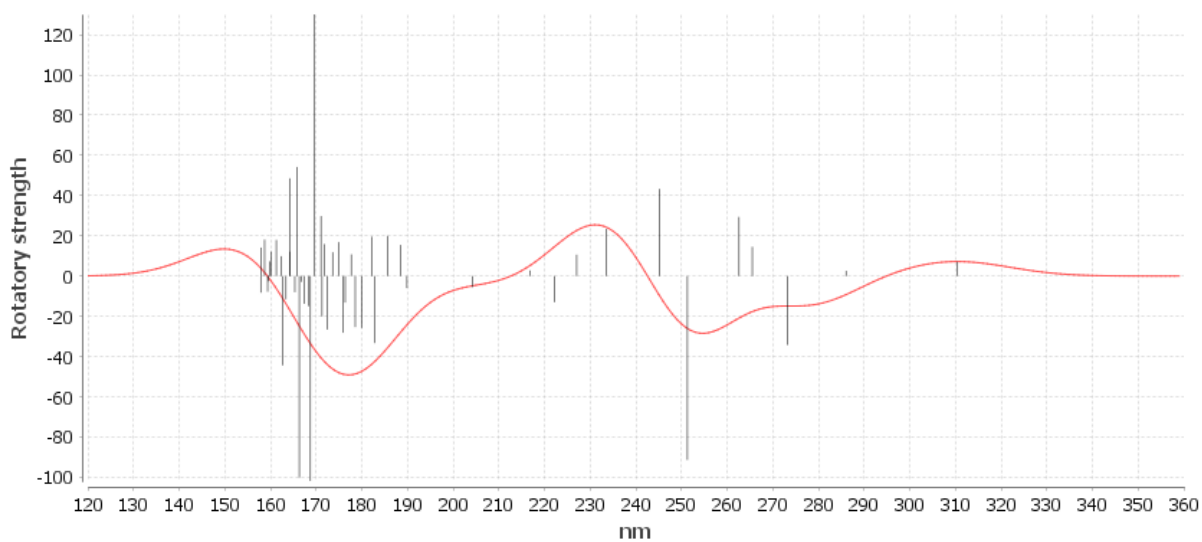

CAM-B3LYP/TZVP, conformer 2

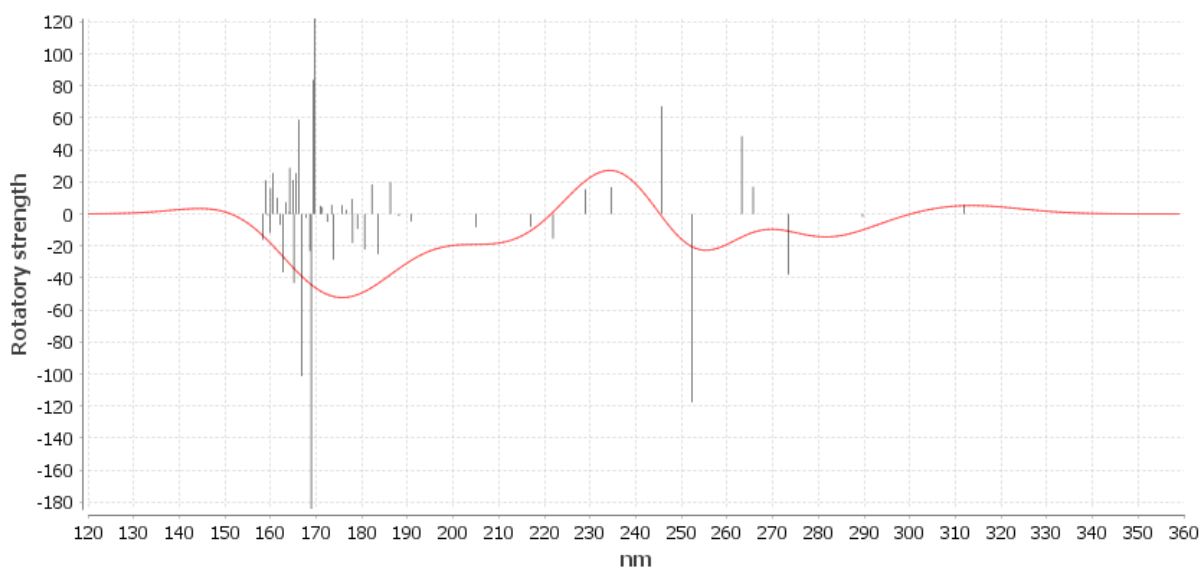

## Calculations of enolate properties

Et-Z-enolate-imid-conf1

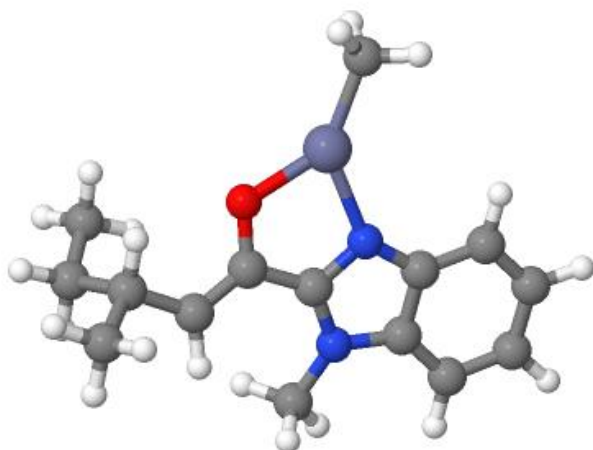

Energy (POTENTIAL) = -2547.588110965 Eh

|    | Atom | X       | Y       | Z       |
|----|------|---------|---------|---------|
| 1  | H    | 0.9953  | 3.7296  | -1.6990 |
| 2  | C    | 0.8516  | 3.8769  | -0.6239 |
| 3  | H    | 0.5806  | 4.9248  | -0.4573 |
| 4  | H    | 0.0044  | 3.2528  | -0.3234 |
| 5  | C    | 2.1106  | 3.5036  | 0.1472  |
| 6  | H    | 2.9398  | 4.1531  | -0.1685 |
| 7  | H    | 1.9660  | 3.6900  | 1.2217  |
| 8  | C    | 2.5443  | 2.0381  | -0.0544 |
| 9  | H    | 2.6094  | 1.8617  | -1.1351 |
| 10 | C    | 3.9198  | 1.7952  | 0.5708  |
| 11 | H    | 4.6659  | 2.4768  | 0.1479  |
| 12 | H    | 4.2582  | 0.7696  | 0.3950  |
| 13 | H    | 3.8953  | 1.9621  | 1.6548  |
| 14 | C    | 1.5341  | 1.0785  | 0.4999  |
| 15 | H    | 1.5677  | 0.8923  | 1.5678  |
| 16 | C    | 0.6665  | 0.4001  | -0.2958 |
| 17 | O    | 0.6351  | 0.5508  | -1.6065 |
| 18 | C    | -0.3014 | -0.6045 | 0.1767  |
| 19 | N    | -0.9063 | -1.3658 | -0.7431 |
| 20 | C    | -1.7545 | -2.2178 | -0.0723 |
| 21 | C    | -1.6586 | -1.9542 | 1.3081  |
| 22 | N    | -0.7394 | -0.9190 | 1.4356  |
| 23 | C    | -0.4301 | -0.2374 | 2.6802  |
| 24 | H    | -0.3464 | 0.8365  | 2.5022  |
| 25 | H    | 0.5043  | -0.6025 | 3.1195  |
| 26 | H    | -1.2443 | -0.4096 | 3.3863  |
| 27 | Zn   | -0.4247 | -0.6795 | -2.6280 |
| 28 | C    | -0.9013 | -1.0941 | -4.4639 |
| 29 | H    | -0.0417 | -0.9643 | -5.1290 |
| 30 | H    | -1.6906 | -0.4250 | -4.8232 |
| 31 | H    | -1.2612 | -2.1207 | -4.5821 |
| 32 | C    | -2.4046 | -2.6629 | 2.2425  |
| 33 | C    | -3.2576 | -3.6432 | 1.7499  |



|    |   |         |         |         |
|----|---|---------|---------|---------|
| 34 | C | -3.3617 | -3.9078 | 0.3767  |
| 35 | C | -2.6135 | -3.2015 | -0.5529 |
| 36 | H | -2.3265 | -2.4793 | 3.3095  |
| 37 | H | -3.8555 | -4.2210 | 2.4478  |
| 38 | H | -4.0416 | -4.6829 | 0.0366  |
| 39 | H | -2.6873 | -3.3995 | -1.6181 |

Et-Z-enolate-Bn-imid

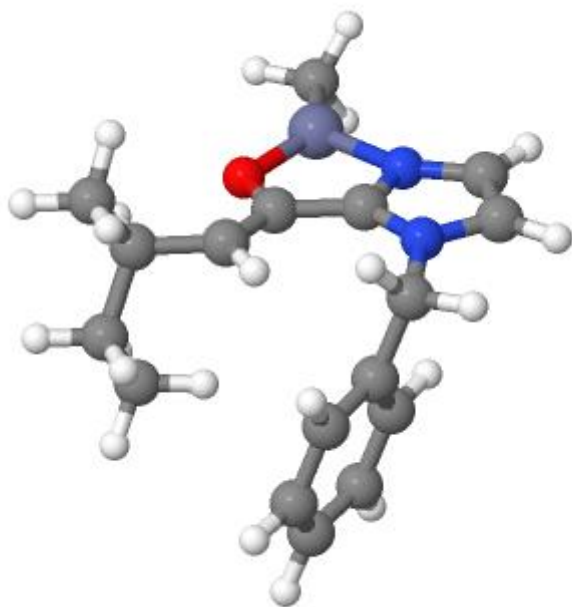

Energy (POTENTIAL) = -2624.964150169 Eh

|    | Atom | X       | Y       | Z       |
|----|------|---------|---------|---------|
| 1  | H    | -1.8813 | 2.7354  | 0.2706  |
| 2  | C    | -1.3269 | 2.3396  | 1.1286  |
| 3  | H    | -1.8543 | 2.6389  | 2.0408  |
| 4  | H    | -1.3557 | 1.2480  | 1.0656  |
| 5  | C    | 0.1091  | 2.8455  | 1.1265  |
| 6  | H    | 0.1189  | 3.9408  | 1.2196  |
| 7  | H    | 0.6418  | 2.4554  | 2.0072  |
| 8  | C    | 0.8908  | 2.4567  | -0.1417 |
| 9  | H    | 0.3297  | 2.8173  | -1.0120 |
| 10 | C    | 2.2741  | 3.1161  | -0.1441 |
| 11 | H    | 2.1877  | 4.2058  | -0.0631 |
| 12 | H    | 2.8182  | 2.8834  | -1.0642 |
| 13 | H    | 2.8775  | 2.7658  | 0.7027  |
| 14 | C    | 1.0050  | 0.9681  | -0.2576 |
| 15 | H    | 1.5424  | 0.4666  | 0.5376  |
| 16 | C    | 0.4348  | 0.2567  | -1.2596 |
| 17 | O    | -0.2428 | 0.8227  | -2.2443 |
| 18 | C    | 0.4874  | -1.2105 | -1.3906 |
| 19 | N    | -0.0415 | -1.7722 | -2.4885 |
| 20 | C    | 0.0967  | -3.1319 | -2.3684 |
| 21 | C    | 0.7106  | -3.4104 | -1.1853 |
| 22 | N    | 0.9608  | -2.1940 | -0.5702 |
| 23 | H    | -0.2481 | -3.8135 | -3.1329 |
| 24 | H    | 0.9902  | -4.3465 | -0.7240 |
| 25 | C    | 1.4541  | -2.0605 | 0.7951  |

|    |    |         |         |         |
|----|----|---------|---------|---------|
| 26 | H  | 1.8076  | -3.0526 | 1.0980  |
| 27 | H  | 2.3283  | -1.4014 | 0.8067  |
| 28 | Zn | -0.9414 | -0.2906 | -3.6271 |
| 29 | C  | -2.0088 | -0.2037 | -5.2473 |
| 30 | H  | -1.5138 | -0.6865 | -6.0958 |
| 31 | H  | -2.2023 | 0.8370  | -5.5259 |
| 32 | H  | -2.9798 | -0.6925 | -5.1145 |
| 33 | C  | 0.4007  | -1.5667 | 1.7626  |
| 34 | C  | -1.5057 | -0.6670 | 3.5958  |
| 35 | C  | 0.7888  | -0.8398 | 2.8862  |
| 36 | C  | -0.9504 | -1.8434 | 1.5653  |
| 37 | C  | -1.8978 | -1.3942 | 2.4776  |
| 38 | C  | -0.1581 | -0.3917 | 3.7989  |
| 39 | H  | 1.8401  | -0.6015 | 3.0386  |
| 40 | H  | -1.2710 | -2.3923 | 0.6833  |
| 41 | H  | -2.9499 | -1.6027 | 2.3053  |
| 42 | H  | 0.1568  | 0.1884  | 4.6616  |
| 43 | H  | -2.2492 | -0.3043 | 4.2995  |

**Et-Z-enolate-benzimid**

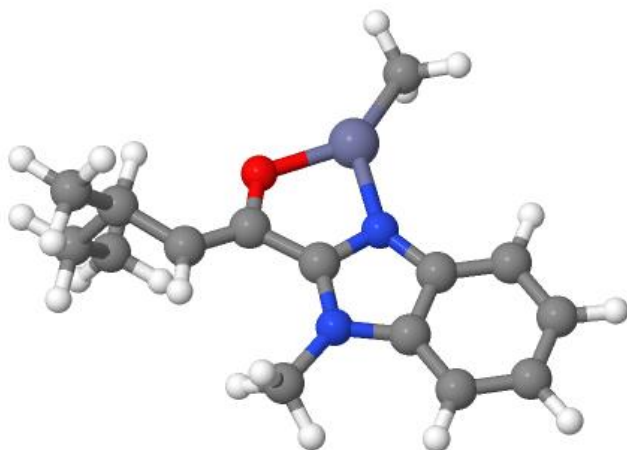

Energy (POTENTIAL) = -2547.588110965 Eh

|    | Atom | X       | Y       | Z       |
|----|------|---------|---------|---------|
| 1  | H    | 0.9953  | 3.7296  | -1.6990 |
| 2  | C    | 0.8516  | 3.8769  | -0.6239 |
| 3  | H    | 0.5806  | 4.9248  | -0.4573 |
| 4  | H    | 0.0044  | 3.2528  | -0.3234 |
| 5  | C    | 2.1106  | 3.5036  | 0.1472  |
| 6  | H    | 2.9398  | 4.1531  | -0.1685 |
| 7  | H    | 1.9660  | 3.6900  | 1.2217  |
| 8  | C    | 2.5443  | 2.0381  | -0.0544 |
| 9  | H    | 2.6094  | 1.8617  | -1.1351 |
| 10 | C    | 3.9198  | 1.7952  | 0.5708  |
| 11 | H    | 4.6659  | 2.4768  | 0.1479  |
| 12 | H    | 4.2582  | 0.7696  | 0.3950  |
| 13 | H    | 3.8953  | 1.9621  | 1.6548  |
| 14 | C    | 1.5341  | 1.0785  | 0.4999  |
| 15 | H    | 1.5677  | 0.8923  | 1.5678  |
| 16 | C    | 0.6665  | 0.4001  | -0.2958 |
| 17 | O    | 0.6351  | 0.5508  | -1.6065 |
| 18 | C    | -0.3014 | -0.6045 | 0.1767  |

|    |    |         |         |         |
|----|----|---------|---------|---------|
| 19 | N  | -0.9063 | -1.3658 | -0.7431 |
| 20 | C  | -1.7545 | -2.2178 | -0.0723 |
| 21 | C  | -1.6586 | -1.9542 | 1.3081  |
| 22 | N  | -0.7394 | -0.9190 | 1.4356  |
| 23 | C  | -0.4301 | -0.2374 | 2.6802  |
| 24 | H  | -0.3464 | 0.8365  | 2.5022  |
| 25 | H  | 0.5043  | -0.6025 | 3.1195  |
| 26 | H  | -1.2443 | -0.4096 | 3.3863  |
| 27 | Zn | -0.4247 | -0.6795 | -2.6280 |
| 28 | C  | -0.9013 | -1.0941 | -4.4639 |
| 29 | H  | -0.0417 | -0.9643 | -5.1290 |
| 30 | H  | -1.6906 | -0.4250 | -4.8232 |
| 31 | H  | -1.2612 | -2.1207 | -4.5821 |
| 32 | C  | -2.4046 | -2.6629 | 2.2425  |
| 33 | C  | -3.2576 | -3.6432 | 1.7499  |
| 34 | C  | -3.3617 | -3.9078 | 0.3767  |
| 35 | C  | -2.6135 | -3.2015 | -0.5529 |
| 36 | H  | -2.3265 | -2.4793 | 3.3095  |
| 37 | H  | -3.8555 | -4.2210 | 2.4478  |
| 38 | H  | -4.0416 | -4.6829 | 0.0366  |
| 39 | H  | -2.6873 | -3.3995 | -1.6181 |

### Ph-Z-enolate-imid

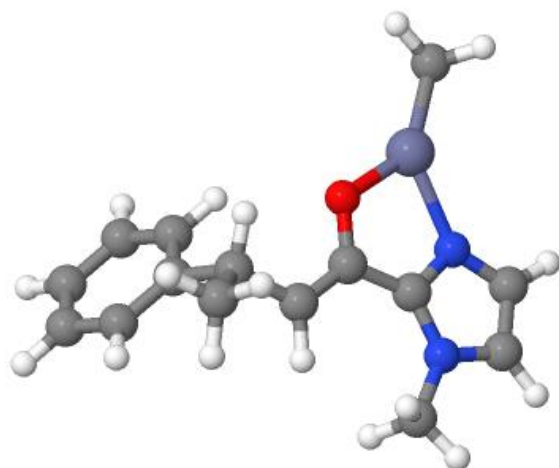

Energy (POTENTIAL) = -2546.364526575 Eh

|    | Atom | X       | Y       | Z       |
|----|------|---------|---------|---------|
| 1  | C    | 1.7517  | 0.8465  | 0.1662  |
| 2  | H    | 1.6582  | 1.2001  | -0.8672 |
| 3  | C    | 3.2283  | 0.5677  | 0.4434  |
| 4  | H    | 3.8193  | 1.4885  | 0.4064  |
| 5  | H    | 3.6213  | -0.1233 | -0.3078 |
| 6  | H    | 3.3816  | 0.1062  | 1.4254  |
| 7  | C    | 0.9399  | -0.4195 | 0.2642  |
| 8  | H    | 1.1075  | -1.0405 | 1.1353  |
| 9  | C    | 0.0063  | -0.7430 | -0.6661 |
| 10 | O    | -0.2807 | 0.0431  | -1.6894 |
| 11 | C    | -0.8076 | -1.9705 | -0.6648 |
| 12 | N    | -1.7615 | -2.1084 | -1.5989 |
| 13 | C    | -2.3362 | -3.3407 | -1.4232 |
| 14 | C    | -1.7284 | -3.9664 | -0.3766 |

|    |    |         |         |         |
|----|----|---------|---------|---------|
| 15 | N  | -0.7610 | -3.0976 | 0.0982  |
| 16 | H  | -3.1389 | -3.6955 | -2.0538 |
| 17 | H  | -1.8891 | -4.9368 | 0.0697  |
| 18 | C  | 0.1560  | -3.3957 | 1.1866  |
| 19 | H  | 1.1907  | -3.2735 | 0.8542  |
| 20 | H  | 0.0024  | -4.4294 | 1.4993  |
| 21 | H  | -0.0233 | -2.7375 | 2.0414  |
| 22 | Zn | -1.7232 | -0.4623 | -2.8483 |
| 23 | C  | -2.6993 | 0.2068  | -4.3876 |
| 24 | H  | -3.7138 | 0.5150  | -4.1138 |
| 25 | H  | -2.7886 | -0.5435 | -5.1794 |
| 26 | H  | -2.1961 | 1.0801  | -4.8141 |
| 27 | C  | 1.1494  | 1.9345  | 1.0469  |
| 28 | C  | -0.0479 | 3.9538  | 2.5914  |
| 29 | C  | 1.7075  | 2.3301  | 2.2624  |
| 30 | C  | -0.0242 | 2.5664  | 0.6193  |
| 31 | C  | -0.6157 | 3.5645  | 1.3804  |
| 32 | C  | 1.1138  | 3.3313  | 3.0285  |
| 33 | H  | 2.6241  | 1.8698  | 2.6193  |
| 34 | H  | -0.4670 | 2.2583  | -0.3249 |
| 35 | H  | -1.5201 | 4.0508  | 1.0233  |
| 36 | H  | 1.5699  | 3.6296  | 3.9693  |
| 37 | H  | -0.5054 | 4.7411  | 3.1848  |

### Ph-E-enolate-imid

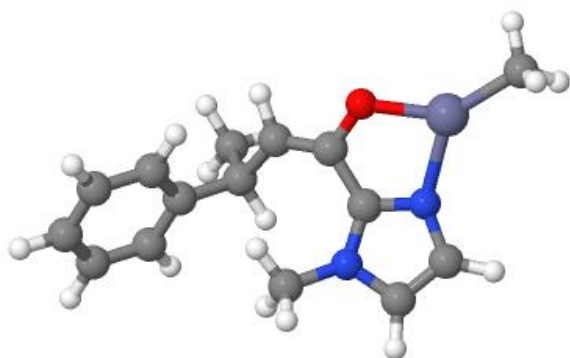

Energy (POTENTIAL) = -2546.356007402 Eh

|    | Atom | X       | Y       | Z       |
|----|------|---------|---------|---------|
| 1  | C    | -0.4358 | 1.4165  | 0.4731  |
| 2  | H    | 0.6563  | 1.3216  | 0.5407  |
| 3  | C    | -0.8689 | 2.3686  | 1.6089  |
| 4  | H    | -0.4070 | 3.3548  | 1.5021  |
| 5  | H    | -0.5929 | 1.9508  | 2.5812  |
| 6  | H    | -1.9551 | 2.5032  | 1.5903  |
| 7  | C    | -1.0744 | 0.0829  | 0.7038  |
| 8  | C    | -0.5075 | -1.1291 | 0.9103  |
| 9  | O    | -1.2034 | -2.1518 | 1.3850  |
| 10 | C    | 0.9125  | -1.4933 | 0.7202  |
| 11 | N    | 1.4172  | -2.4968 | 1.4539  |
| 12 | C    | 2.6999  | -2.7108 | 1.0186  |
| 13 | C    | 2.9761  | -1.8457 | 0.0014  |
| 14 | N    | 1.8355  | -1.0850 | -0.1915 |
| 15 | H    | 3.3343  | -3.4694 | 1.4552  |

|    |    |         |         |         |
|----|----|---------|---------|---------|
| 16 | H  | 3.8565  | -1.7148 | -0.6109 |
| 17 | C  | 1.6134  | -0.2200 | -1.3455 |
| 18 | H  | 0.5417  | -0.1138 | -1.5153 |
| 19 | H  | 2.0707  | -0.6794 | -2.2250 |
| 20 | H  | 2.0425  | 0.7747  | -1.1979 |
| 21 | Zn | -0.2239 | -3.5658 | 2.2123  |
| 22 | C  | -0.5002 | -5.2238 | 3.1842  |
| 23 | H  | -1.5062 | -5.2462 | 3.6154  |
| 24 | H  | 0.2159  | -5.3559 | 4.0008  |
| 25 | H  | -0.4104 | -6.0922 | 2.5232  |
| 26 | C  | -0.7715 | 2.0575  | -0.8672 |
| 27 | C  | -1.3908 | 3.3329  | -3.2918 |
| 28 | C  | -1.8362 | 1.6183  | -1.6534 |
| 29 | C  | -0.0182 | 3.1434  | -1.3214 |
| 30 | C  | -0.3186 | 3.7741  | -2.5216 |
| 31 | C  | -2.1468 | 2.2535  | -2.8526 |
| 32 | H  | -2.4206 | 0.7613  | -1.3302 |
| 33 | H  | 0.8197  | 3.4987  | -0.7226 |
| 34 | H  | 0.2847  | 4.6135  | -2.8577 |
| 35 | H  | -2.9846 | 1.8981  | -3.4471 |
| 36 | H  | -1.6317 | 3.8265  | -4.2293 |
| 37 | H  | -2.1421 | 0.1039  | 0.9239  |

**Et-E-enolate-imid**

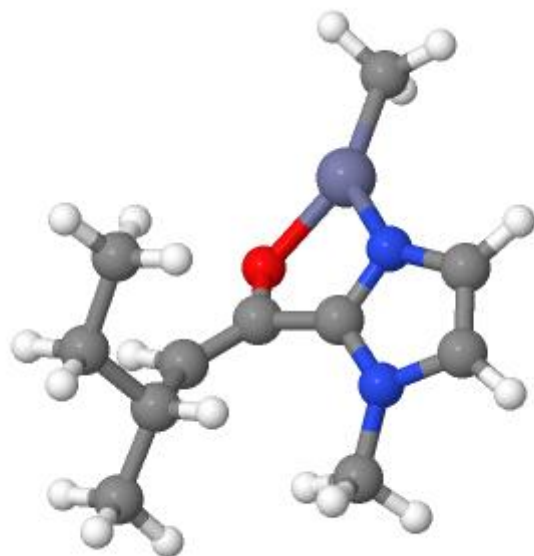

Energy (POTENTIAL) = -2393.962428901 Eh

|    | Atom | X       | Y       | Z       |
|----|------|---------|---------|---------|
| 1  | C    | -1.5053 | 1.4897  | -0.2803 |
| 2  | H    | -0.4879 | 1.8960  | -0.2002 |
| 3  | C    | -2.4688 | 2.3651  | 0.5266  |
| 4  | H    | -2.4651 | 3.4010  | 0.1697  |
| 5  | H    | -2.2253 | 2.3667  | 1.5936  |
| 6  | H    | -3.4915 | 1.9829  | 0.4307  |
| 7  | C    | -1.5317 | 0.0647  | 0.1760  |
| 8  | C    | -0.5033 | -0.7771 | 0.4315  |
| 9  | O    | -0.6571 | -2.0948 | 0.4963  |
| 10 | C    | 0.9133  | -0.4016 | 0.6118  |

|    |    |         |         |         |
|----|----|---------|---------|---------|
| 11 | N  | 1.8620  | -1.2806 | 0.2597  |
| 12 | C  | 3.0665  | -0.7527 | 0.6511  |
| 13 | C  | 2.8522  | 0.4480  | 1.2609  |
| 14 | N  | 1.4836  | 0.6605  | 1.2417  |
| 15 | H  | 4.0015  | -1.2664 | 0.4770  |
| 16 | H  | 3.5308  | 1.1524  | 1.7198  |
| 17 | C  | 0.7964  | 1.6845  | 2.0180  |
| 18 | H  | 0.7964  | 2.6513  | 1.5069  |
| 19 | H  | 1.2910  | 1.7904  | 2.9870  |
| 20 | H  | -0.2347 | 1.3653  | 2.1753  |
| 21 | Zn | 0.8861  | -3.1404 | 0.0850  |
| 22 | C  | 1.4814  | -4.9559 | -0.2639 |
| 23 | H  | 1.2264  | -5.6167 | 0.5712  |
| 24 | H  | 2.5623  | -5.0178 | -0.4211 |
| 25 | H  | 0.9914  | -5.3614 | -1.1551 |
| 26 | H  | -2.5013 | -0.4304 | 0.0910  |
| 27 | C  | -1.8778 | 1.5508  | -1.7783 |
| 28 | H  | -2.9032 | 1.1727  | -1.8971 |
| 29 | H  | -1.8996 | 2.6050  | -2.0885 |
| 30 | C  | -0.9328 | 0.7644  | -2.6762 |
| 31 | H  | -0.9566 | -0.3016 | -2.4343 |
| 32 | H  | 0.1023  | 1.1057  | -2.5552 |
| 33 | H  | -1.2019 | 0.8802  | -3.7308 |

**Z-Me-TMS-benzoxazol**

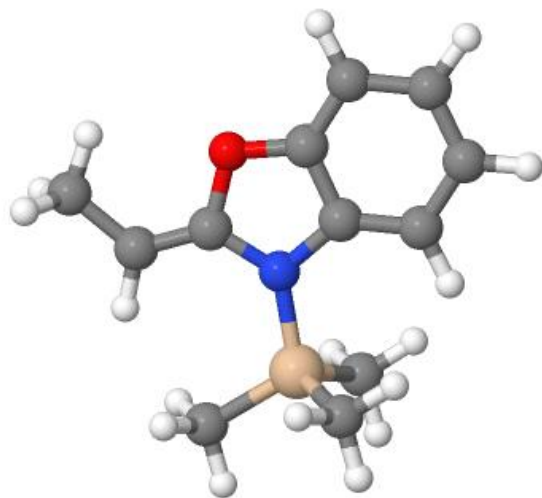

Energy (POTENTIAL) = -886.8360538115 Eh

|    | Atom | X       | Y       | Z       |
|----|------|---------|---------|---------|
| 1  | C    | -0.6890 | -0.0001 | -3.9403 |
| 2  | C    | -0.9617 | -0.0001 | -2.4688 |
| 3  | C    | -0.0035 | -0.0000 | -1.5335 |
| 4  | O    | 1.3344  | 0.0001  | -1.9023 |
| 5  | N    | -0.0639 | -0.0001 | -0.1229 |
| 6  | Si   | -1.4640 | -0.0000 | 0.9785  |
| 7  | C    | -1.3579 | -1.5639 | 2.0056  |
| 8  | C    | -1.3576 | 1.5638  | 2.0056  |
| 9  | C    | -3.1002 | 0.0001  | 0.0705  |
| 10 | C    | 3.2256  | 0.0001  | 1.7055  |
| 11 | C    | 2.0949  | 0.0001  | -0.7704 |

|    |   |         |         |         |
|----|---|---------|---------|---------|
| 12 | C | 1.8268  | -0.0001 | 1.6133  |
| 13 | C | 4.0331  | 0.0000  | 0.5759  |
| 14 | C | 3.4669  | 0.0002  | -0.7048 |
| 15 | C | 1.2610  | -0.0001 | 0.3457  |
| 16 | H | -3.2520 | -0.8881 | -0.5484 |
| 17 | H | -3.2518 | 0.8883  | -0.5484 |
| 18 | H | -1.4950 | 2.4400  | 1.3627  |
| 19 | H | -0.3993 | 1.6866  | 2.5159  |
| 20 | H | 3.6837  | 0.0004  | 2.6898  |
| 21 | H | 5.1135  | -0.0003 | 0.6801  |
| 22 | H | 4.0702  | 0.0004  | -1.6066 |
| 23 | H | 0.3803  | 0.0001  | -4.1564 |
| 24 | H | -1.9927 | -0.0002 | -2.1488 |
| 25 | H | -2.1447 | 1.5868  | 2.7673  |
| 26 | H | 1.2273  | -0.0002 | 2.5164  |
| 27 | H | -2.1450 | -1.5868 | 2.7672  |
| 28 | H | -3.8912 | 0.0002  | 0.8308  |
| 29 | H | -1.4953 | -2.4400 | 1.3626  |
| 30 | H | -0.3995 | -1.6868 | 2.5159  |
| 31 | H | -1.1265 | -0.8804 | -4.4290 |
| 32 | H | -1.1268 | 0.8801  | -4.4290 |

**Z-Me-TMS-ketene-aminal**

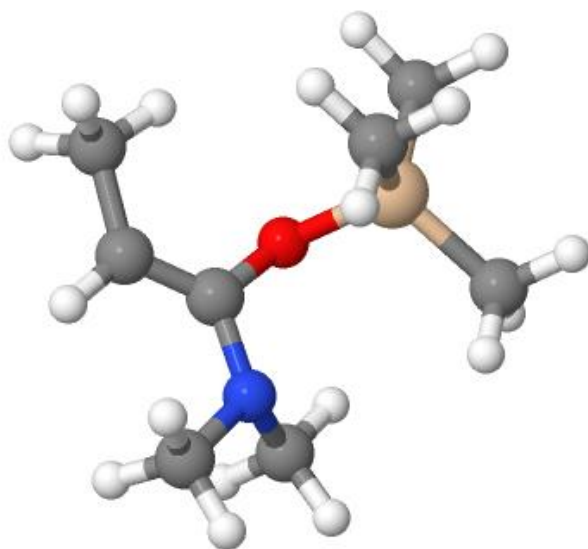

Energy (POTENTIAL) = -735.6419055809 Eh

|    | Atom | X       | Y       | Z       |
|----|------|---------|---------|---------|
| 1  | C    | -1.7412 | 1.3412  | 0.3963  |
| 2  | C    | -0.7609 | 0.4680  | 0.6745  |
| 3  | O    | -0.5767 | -0.6401 | -0.1020 |
| 4  | N    | 0.1701  | 0.5556  | 1.7232  |
| 5  | C    | 0.1233  | 1.7667  | 2.5230  |
| 6  | C    | 0.2776  | -0.6492 | 2.5530  |
| 7  | Si   | 0.6668  | -0.8966 | -1.2013 |
| 8  | C    | -0.0378 | -2.1439 | -2.4056 |
| 9  | C    | 2.1752  | -1.6239 | -0.3572 |
| 10 | C    | 1.0824  | 0.7243  | -2.0365 |
| 11 | C    | -2.6179 | 1.2531  | -0.8118 |
| 12 | H    | -1.9275 | 2.1555  | 1.0880  |

|    |   |         |         |         |
|----|---|---------|---------|---------|
| 13 | H | -3.6763 | 1.1929  | -0.5290 |
| 14 | H | -2.5152 | 2.1345  | -1.4588 |
| 15 | H | -2.3875 | 0.3670  | -1.4067 |
| 16 | H | 2.5738  | -0.9495 | 0.4069  |
| 17 | H | 2.9728  | -1.8117 | -1.0854 |
| 18 | H | 1.4468  | 1.4618  | -1.3145 |
| 19 | H | 1.8584  | 0.5901  | -2.7983 |
| 20 | H | 1.9457  | -2.5807 | 0.1245  |
| 21 | H | -0.7968 | 1.8506  | 3.1298  |
| 22 | H | 0.1918  | 2.6451  | 1.8758  |
| 23 | H | 0.9781  | 1.7730  | 3.2063  |
| 24 | H | 1.2068  | -0.6139 | 3.1308  |
| 25 | H | -0.5680 | -0.7430 | 3.2574  |
| 26 | H | -0.8956 | -1.7388 | -2.9520 |
| 27 | H | 0.2020  | 1.1507  | -2.5283 |
| 28 | H | 0.7096  | -2.4548 | -3.1440 |
| 29 | H | -0.3776 | -3.0448 | -1.8834 |
| 30 | H | 0.2975  | -1.5394 | 1.9252  |

**Z-Me-TMS-ketene-acetal**

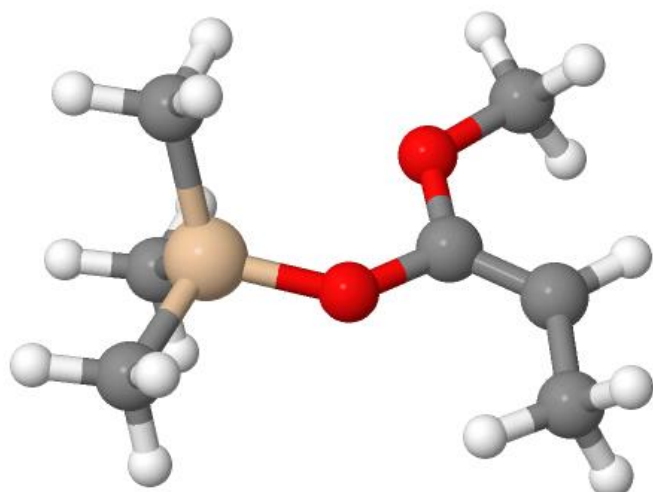

Energy (POTENTIAL) = -716.2253846488 Eh

|    | Atom | X       | Y       | Z       |
|----|------|---------|---------|---------|
| 1  | C    | -0.8391 | -0.0000 | 2.3653  |
| 2  | C    | -0.0666 | -0.0000 | 1.2724  |
| 3  | O    | -0.5800 | -0.0000 | 0.0345  |
| 4  | O    | 1.2943  | 0.0000  | 1.2320  |
| 5  | C    | 2.0026  | 0.0000  | 2.4617  |
| 6  | Si   | 0.0305  | -0.0000 | -1.5307 |
| 7  | C    | -1.5205 | -0.0000 | -2.5813 |
| 8  | C    | 1.0329  | -1.5399 | -1.8878 |
| 9  | C    | 1.0329  | 1.5399  | -1.8878 |
| 10 | C    | -2.3328 | -0.0000 | 2.3034  |
| 11 | H    | -0.3652 | 0.0000  | 3.3395  |
| 12 | H    | -2.7573 | -0.8817 | 2.7996  |
| 13 | H    | -2.7573 | 0.8817  | 2.7996  |
| 14 | H    | -2.6811 | -0.0000 | 1.2690  |
| 15 | H    | 1.9604  | -1.5751 | -1.3104 |
| 16 | H    | 1.3004  | -1.5715 | -2.9512 |
| 17 | H    | 1.9605  | 1.5751  | -1.3104 |



|    |   |         |         |         |
|----|---|---------|---------|---------|
| 18 | H | 1.3004  | 1.5715  | -2.9512 |
| 19 | H | 0.4628  | -2.4487 | -1.6690 |
| 20 | H | 1.7725  | -0.8957 | 3.0513  |
| 21 | H | 1.7725  | 0.8958  | 3.0513  |
| 22 | H | 3.0612  | 0.0000  | 2.1971  |
| 23 | H | -2.1385 | 0.8831  | -2.3898 |
| 24 | H | 0.4629  | 2.4487  | -1.6690 |
| 25 | H | -1.2700 | -0.0000 | -3.6484 |
| 26 | H | -2.1385 | -0.8831 | -2.3898 |

**RR-Me-C7-benzodithioly1-conf3**

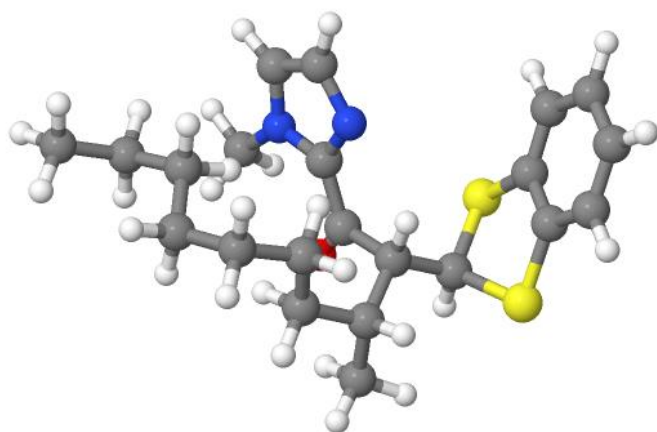

Energy (POTENTIAL) = -1835.832379765 Eh

|    | Atom | X       | Y       | Z       |
|----|------|---------|---------|---------|
| 1  | C    | 0.6501  | -0.6081 | -1.4224 |
| 2  | O    | 0.3900  | -0.8385 | -2.5957 |
| 3  | C    | 0.9371  | 0.7555  | -0.9547 |
| 4  | N    | 1.2941  | 1.0863  | 0.2852  |
| 5  | C    | 1.4825  | 2.4277  | 0.2844  |
| 6  | C    | 1.2355  | 2.9382  | -0.9840 |
| 7  | N    | 0.8923  | 1.8719  | -1.7667 |
| 8  | H    | 1.7795  | 2.9716  | 1.1817  |
| 9  | H    | 1.2708  | 3.9508  | -1.3823 |
| 10 | C    | 0.5184  | 1.9397  | -3.1729 |
| 11 | H    | 1.1736  | 1.2955  | -3.7763 |
| 12 | H    | 0.6075  | 2.9866  | -3.5021 |
| 13 | H    | -0.5186 | 1.5971  | -3.3095 |
| 14 | C    | 0.7140  | -1.7167 | -0.3725 |
| 15 | H    | 0.9779  | -1.2510 | 0.5870  |
| 16 | C    | -0.6544 | -2.4412 | -0.2059 |
| 17 | H    | -0.5394 | -3.0709 | 0.6950  |
| 18 | C    | -1.8006 | -1.4481 | 0.0654  |
| 19 | H    | -2.7413 | -2.0288 | 0.1267  |
| 20 | H    | -1.9181 | -0.7904 | -0.8163 |
| 21 | C    | -1.0135 | -3.3611 | -1.3811 |
| 22 | H    | -1.0447 | -2.8030 | -2.3313 |
| 23 | H    | -2.0043 | -3.8195 | -1.2111 |
| 24 | H    | -0.2912 | -4.1884 | -1.4953 |
| 25 | C    | -1.6651 | -0.6076 | 1.3391  |
| 26 | H    | -1.4949 | -1.2868 | 2.1965  |
| 27 | H    | -0.7695 | 0.0335  | 1.2833  |
| 28 | C    | -2.9033 | 0.2549  | 1.6382  |

|    |   |         |         |         |
|----|---|---------|---------|---------|
| 29 | H | -2.7111 | 0.8395  | 2.5586  |
| 30 | H | -3.7586 | -0.4093 | 1.8689  |
| 31 | C | -3.3277 | 1.2173  | 0.5164  |
| 32 | H | -3.6364 | 0.6383  | -0.3756 |
| 33 | H | -4.2328 | 1.7587  | 0.8488  |
| 34 | C | -2.2433 | 2.2200  | 0.1082  |
| 35 | H | -1.3176 | 1.6724  | -0.1301 |
| 36 | H | -1.9967 | 2.8653  | 0.9743  |
| 37 | C | -2.6021 | 3.0978  | -1.0982 |
| 38 | H | -1.7193 | 3.7137  | -1.3560 |
| 39 | H | -2.7854 | 2.4451  | -1.9753 |
| 40 | C | -3.8090 | 4.0162  | -0.8885 |
| 41 | H | -3.6616 | 4.6677  | -0.0067 |
| 42 | H | -4.7384 | 3.4418  | -0.7251 |
| 43 | H | -3.9742 | 4.6690  | -1.7649 |
| 44 | C | 1.8704  | -2.6601 | -0.7490 |
| 45 | S | 3.4609  | -1.7430 | -0.9252 |
| 46 | C | 3.8250  | -1.8427 | 0.8070  |
| 47 | C | 3.2099  | -2.9074 | 1.4984  |
| 48 | S | 2.1576  | -3.9555 | 0.5238  |
| 49 | H | 1.6934  | -3.1606 | -1.7098 |
| 50 | C | 3.4662  | -3.1012 | 2.8571  |
| 51 | C | 4.3464  | -2.2391 | 3.5235  |
| 52 | C | 4.9503  | -1.1798 | 2.8393  |
| 53 | C | 4.6845  | -0.9729 | 1.4801  |
| 54 | H | 2.9765  | -3.9180 | 3.3948  |
| 55 | H | 4.5470  | -2.3908 | 4.5882  |
| 56 | H | 5.6233  | -0.4981 | 3.3678  |
| 57 | H | 5.1384  | -0.1334 | 0.9466  |

**RR-Me-C7-benzodithiolylyl-conf2**

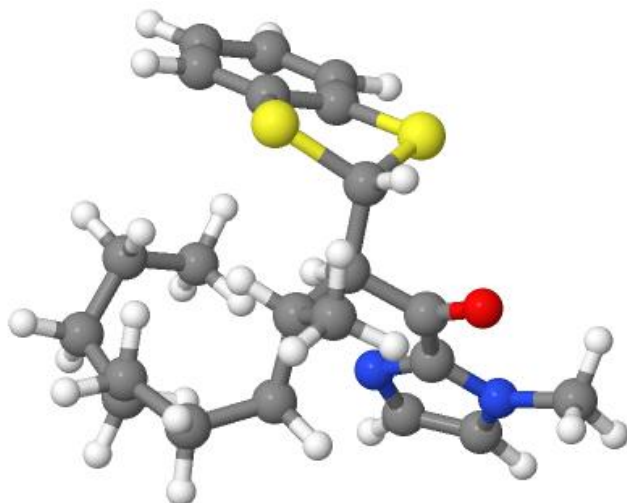

Energy (POTENTIAL) = -1835.833804445 Eh

|   | Atom | X      | Y       | Z       |
|---|------|--------|---------|---------|
| 1 | C    | 0.6376 | -2.0494 | -1.3158 |
| 2 | O    | 0.6383 | -3.2440 | -1.5830 |
| 3 | C    | 1.3716 | -1.0795 | -2.1398 |
| 4 | N    | 1.3981 | 0.2381  | -1.9475 |
| 5 | C    | 2.1876 | 0.7526  | -2.9215 |

|    |   |         |         |         |
|----|---|---------|---------|---------|
| 6  | C | 2.6625  | -0.2707 | -3.7316 |
| 7  | N | 2.1397  | -1.4306 | -3.2322 |
| 8  | H | 2.3846  | 1.8221  | -3.0018 |
| 9  | H | 3.3190  | -0.2668 | -4.6006 |
| 10 | C | 2.3815  | -2.7660 | -3.7634 |
| 11 | H | 2.8259  | -3.4110 | -2.9909 |
| 12 | H | 3.0695  | -2.6765 | -4.6186 |
| 13 | H | 1.4379  | -3.2290 | -4.0884 |
| 14 | C | -0.1189 | -1.5034 | -0.1093 |
| 15 | H | 0.2302  | -0.4796 | 0.0862  |
| 16 | C | -1.6493 | -1.4211 | -0.3818 |
| 17 | H | -2.0567 | -0.9820 | 0.5437  |
| 18 | C | -1.9648 | -0.4522 | -1.5455 |
| 19 | H | -2.0740 | -1.0323 | -2.4815 |
| 20 | H | -1.1119 | 0.2243  | -1.7104 |
| 21 | C | -2.3287 | -2.7800 | -0.5814 |
| 22 | H | -1.8907 | -3.3328 | -1.4298 |
| 23 | H | -3.4052 | -2.6347 | -0.7827 |
| 24 | H | -2.2493 | -3.4213 | 0.3142  |
| 25 | C | -3.2278 | 0.3913  | -1.3090 |
| 26 | H | -3.4984 | 0.9095  | -2.2492 |
| 27 | H | -4.0783 | -0.2755 | -1.0703 |
| 28 | C | -3.0674 | 1.4313  | -0.1886 |
| 29 | H | -2.7380 | 0.9184  | 0.7337  |
| 30 | H | -4.0562 | 1.8646  | 0.0540  |
| 31 | C | -2.0939 | 2.5736  | -0.5173 |
| 32 | H | -1.2050 | 2.1782  | -1.0389 |
| 33 | H | -2.5825 | 3.2617  | -1.2334 |
| 34 | C | -1.6344 | 3.3596  | 0.7211  |
| 35 | H | -2.5228 | 3.6296  | 1.3257  |
| 36 | H | -1.1812 | 4.3167  | 0.3979  |
| 37 | C | -0.6206 | 2.6162  | 1.6078  |
| 38 | H | -0.4966 | 3.1788  | 2.5526  |
| 39 | H | -1.0258 | 1.6300  | 1.9029  |
| 40 | C | 0.7542  | 2.4217  | 0.9615  |
| 41 | H | 1.1933  | 3.3966  | 0.6741  |
| 42 | H | 0.7143  | 1.7950  | 0.0538  |
| 43 | H | 1.4506  | 1.9332  | 1.6638  |
| 44 | C | 0.2414  | -2.3657 | 1.1094  |
| 45 | S | 2.0613  | -2.3581 | 1.4206  |
| 46 | C | 2.0020  | -0.9761 | 2.5278  |
| 47 | C | 0.7512  | -0.7146 | 3.1223  |
| 48 | S | -0.5725 | -1.8005 | 2.6584  |
| 49 | H | -0.0364 | -3.4153 | 0.9494  |
| 50 | C | 0.6170  | 0.3196  | 4.0507  |
| 51 | C | 1.7356  | 1.0871  | 4.3959  |
| 52 | C | 2.9764  | 0.8312  | 3.8041  |
| 53 | C | 3.1119  | -0.1966 | 2.8631  |
| 54 | H | -0.3583 | 0.5312  | 4.4971  |
| 55 | H | 1.6291  | 1.8997  | 5.1204  |
| 56 | H | 3.8452  | 1.4431  | 4.0637  |
| 57 | H | 4.0780  | -0.3896 | 2.3883  |

SR-Me-C7-benzodithiolyl-conf2

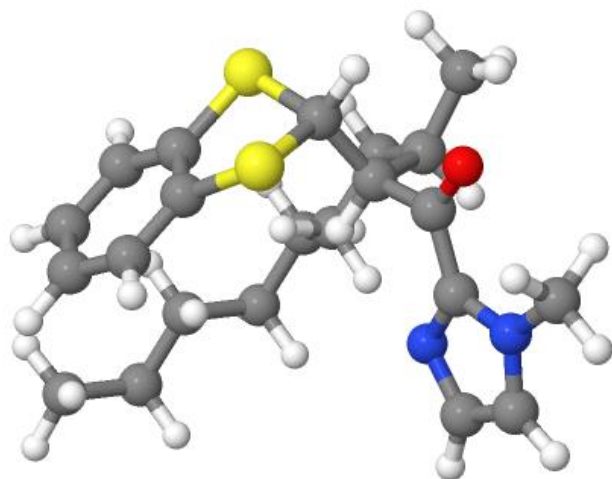

Energy (POTENTIAL) = -1835.831360044 Eh

|    | Atom | X       | Y       | Z       |
|----|------|---------|---------|---------|
| 1  | C    | 0.8281  | 2.7297  | -1.4600 |
| 2  | O    | 0.9209  | 3.9484  | -1.5034 |
| 3  | C    | 1.6451  | 1.8619  | -2.3216 |
| 4  | N    | 1.5952  | 0.5316  | -2.3373 |
| 5  | C    | 2.4991  | 0.1279  | -3.2636 |
| 6  | C    | 3.1214  | 1.2330  | -3.8294 |
| 7  | N    | 2.5731  | 2.3319  | -3.2290 |
| 8  | H    | 2.6696  | -0.9261 | -3.4864 |
| 9  | H    | 3.8947  | 1.3237  | -4.5908 |
| 10 | C    | 2.9325  | 3.7170  | -3.5031 |
| 11 | H    | 2.0500  | 4.2871  | -3.8288 |
| 12 | H    | 3.6969  | 3.7245  | -4.2959 |
| 13 | H    | 3.3298  | 4.1980  | -2.5964 |
| 14 | C    | -0.1661 | 2.0146  | -0.5477 |
| 15 | C    | -1.4924 | 1.8220  | -1.3536 |
| 16 | H    | -1.1576 | 1.5630  | -2.3753 |
| 17 | C    | -2.3632 | 0.6325  | -0.8914 |
| 18 | H    | -3.1088 | 0.4556  | -1.6913 |
| 19 | H    | -2.9362 | 0.9129  | 0.0085  |
| 20 | C    | -2.3159 | 3.1110  | -1.4489 |
| 21 | H    | -2.7447 | 3.3872  | -0.4684 |
| 22 | H    | -3.1610 | 2.9756  | -2.1475 |
| 23 | H    | -1.7075 | 3.9603  | -1.8054 |
| 24 | C    | -1.6014 | -0.6664 | -0.6183 |
| 25 | H    | -0.9053 | -0.8753 | -1.4529 |
| 26 | H    | -0.9699 | -0.5316 | 0.2761  |
| 27 | C    | -2.5192 | -1.8729 | -0.3990 |
| 28 | H    | -3.1795 | -1.9917 | -1.2800 |
| 29 | H    | -3.1900 | -1.6702 | 0.4598  |
| 30 | C    | -1.7694 | -3.1907 | -0.1593 |
| 31 | H    | -2.5009 | -4.0220 | -0.1325 |
| 32 | H    | -1.1087 | -3.3921 | -1.0257 |
| 33 | C    | -0.9351 | -3.2253 | 1.1255  |
| 34 | H    | -1.5927 | -3.0098 | 1.9911  |
| 35 | H    | -0.1838 | -2.4146 | 1.1145  |
| 36 | C    | -0.2183 | -4.5600 | 1.3509  |

|    |   |         |         |         |
|----|---|---------|---------|---------|
| 37 | H | -0.9637 | -5.3795 | 1.3708  |
| 38 | H | 0.4374  | -4.7677 | 0.4828  |
| 39 | C | 0.6135  | -4.5927 | 2.6349  |
| 40 | H | -0.0234 | -4.4393 | 3.5263  |
| 41 | H | 1.3772  | -3.7929 | 2.6350  |
| 42 | H | 1.1340  | -5.5599 | 2.7576  |
| 43 | C | -0.2453 | 2.7961  | 0.7682  |
| 44 | S | -1.4408 | 2.1359  | 1.9945  |
| 45 | C | -0.2941 | 0.9530  | 2.6498  |
| 46 | C | 1.0701  | 1.2593  | 2.4601  |
| 47 | S | 1.4082  | 2.7742  | 1.6005  |
| 48 | H | -0.4935 | 3.8511  | 0.5962  |
| 49 | C | 2.0529  | 0.4050  | 2.9657  |
| 50 | C | 1.6748  | -0.7429 | 3.6744  |
| 51 | C | 0.3226  | -1.0427 | 3.8634  |
| 52 | C | -0.6670 | -0.1998 | 3.3433  |
| 53 | H | 3.1102  | 0.6321  | 2.8026  |
| 54 | H | 2.4448  | -1.4135 | 4.0669  |
| 55 | H | 0.0317  | -1.9507 | 4.3981  |
| 56 | H | -1.7254 | -0.4457 | 3.4662  |
| 57 | H | 0.2467  | 1.0201  | -0.3414 |

**SR-Me-C7-benzodithioly1-conf3**

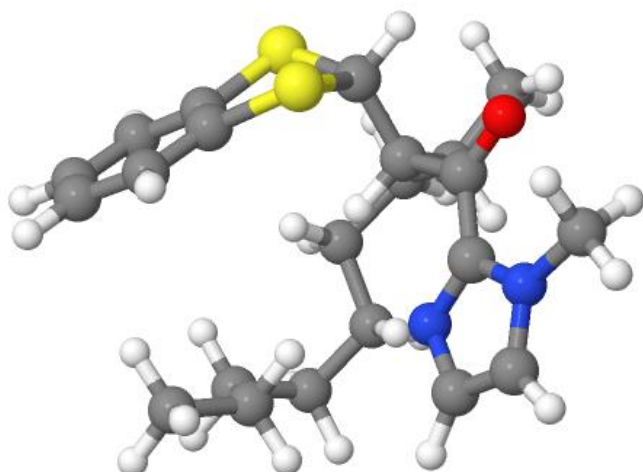

Energy (POTENTIAL) = -1835.834404836 Eh

|    | Atom | X       | Y       | Z       |
|----|------|---------|---------|---------|
| 1  | C    | 0.2822  | 2.4531  | -0.9490 |
| 2  | O    | 0.4073  | 3.6700  | -0.9426 |
| 3  | C    | 0.8360  | 1.6347  | -2.0355 |
| 4  | N    | 0.7385  | 0.3114  | -2.1269 |
| 5  | C    | 1.3877  | -0.0460 | -3.2620 |
| 6  | C    | 1.9000  | 1.0850  | -3.8843 |
| 7  | N    | 1.5451  | 2.1494  | -3.1025 |
| 8  | H    | 1.4645  | -1.0863 | -3.5796 |
| 9  | H    | 2.4795  | 1.2147  | -4.7972 |
| 10 | C    | 1.8816  | 3.5430  | -3.3634 |
| 11 | H    | 0.9682  | 4.1471  | -3.4697 |
| 12 | H    | 2.4703  | 3.5868  | -4.2929 |
| 13 | H    | 2.4660  | 3.9591  | -2.5293 |
| 14 | C    | -0.4808 | 1.7110  | 0.1512  |

|    |   |         |         |         |
|----|---|---------|---------|---------|
| 15 | C | -1.9957 | 1.7150  | -0.2358 |
| 16 | H | -2.0045 | 1.4472  | -1.3088 |
| 17 | C | -2.8651 | 0.6605  | 0.4873  |
| 18 | H | -3.8395 | 0.6454  | -0.0396 |
| 19 | H | -3.0756 | 1.0101  | 1.5110  |
| 20 | C | -2.6378 | 3.1016  | -0.0971 |
| 21 | H | -2.7212 | 3.3976  | 0.9650  |
| 22 | H | -3.6614 | 3.0897  | -0.5120 |
| 23 | H | -2.0610 | 3.8818  | -0.6208 |
| 24 | C | -2.3269 | -0.7723 | 0.5620  |
| 25 | H | -1.3886 | -0.7875 | 1.1435  |
| 26 | H | -3.0482 | -1.3691 | 1.1544  |
| 27 | C | -2.1198 | -1.4542 | -0.7944 |
| 28 | H | -1.3107 | -0.9489 | -1.3505 |
| 29 | H | -3.0395 | -1.3256 | -1.3987 |
| 30 | C | -1.8190 | -2.9576 | -0.6879 |
| 31 | H | -2.6776 | -3.4584 | -0.1983 |
| 32 | H | -1.7600 | -3.3813 | -1.7097 |
| 33 | C | -0.5349 | -3.3286 | 0.0689  |
| 34 | H | -0.4757 | -4.4329 | 0.1354  |
| 35 | H | -0.5912 | -2.9681 | 1.1143  |
| 36 | C | 0.7514  | -2.7996 | -0.5742 |
| 37 | H | 0.7728  | -3.1074 | -1.6394 |
| 38 | H | 0.7427  | -1.6963 | -0.5865 |
| 39 | C | 2.0180  | -3.2910 | 0.1276  |
| 40 | H | 2.0892  | -4.3954 | 0.1075  |
| 41 | H | 2.0298  | -2.9718 | 1.1847  |
| 42 | H | 2.9281  | -2.8857 | -0.3518 |
| 43 | C | -0.0876 | 2.3589  | 1.4859  |
| 44 | S | -0.8535 | 1.6200  | 2.9793  |
| 45 | C | 0.3789  | 0.3555  | 3.1339  |
| 46 | C | 1.6271  | 0.6492  | 2.5465  |
| 47 | S | 1.7447  | 2.2184  | 1.7296  |
| 48 | H | -0.3173 | 3.4319  | 1.4923  |
| 49 | C | 2.6831  | -0.2570 | 2.6632  |
| 50 | C | 2.4966  | -1.4482 | 3.3756  |
| 51 | C | 1.2551  | -1.7439 | 3.9466  |
| 52 | C | 0.1881  | -0.8459 | 3.8195  |
| 53 | H | 3.6467  | -0.0374 | 2.1952  |
| 54 | H | 3.3247  | -2.1570 | 3.4660  |
| 55 | H | 1.1083  | -2.6850 | 4.4848  |
| 56 | H | -0.7887 | -1.0791 | 4.2522  |
| 57 | H | -0.1332 | 0.6697  | 0.1532  |

## Energies and enolate properties

Geometry: r2-SCAN-3c/def2-mTZVP

SP energy and property calculations: wB97X-D4/def2-TZVPPD

| Name                   | Energy (Hartree)  | HOMO energy (Hartree) | HOMO energy (eV) | NBO charge at C-2 |
|------------------------|-------------------|-----------------------|------------------|-------------------|
| Et-Z-enolate-imid      | -2394.29790888442 | -0.2855               | -7.77            | -0.275            |
| Et-E-enolate-imid      | -2394.28636376604 | -0.2861               | -7.79            | -0.287            |
| Ph-Z-enolate-imid      | -2546.72904419517 | -0.2871               | -7.81            | -0.261            |
| Ph-E-enolate-imid      | -2546.71972031304 | -0.2894               | -7.88            | -0.291            |
| Et-Z-enolate-benzimid  | -2547.95816848451 | -0.2899               | -7.89            | -0.254            |
| Et-Z-enolate-Bn-imid   | -2625.36949727832 | -0.2816               | -7.66            | -0.252            |
| Z-Me-TMS-benzoxazol    | -887.11236124528  | -0.2621               | -7.13            | -0.368            |
| Z-Me-TMS-ketene-aminal | -735.89437601138  | -0.2894               | -7.87            | -0.343            |
| Z-Me-TMS-ketene-acetal | -716.45213101026  | -0.2968               | -8.08            | -0.396            |

## 8. References

1. Armarego, W. L. F.; Chai, C. L. L. *Purification of Laboratory Chemicals (6th Edition)*; Elsevier: Online version available at [www.knovel.com](http://www.knovel.com), 2009.
2. Drissi-Amraoui, S.; Schmid, T. E.; Lauberteaux, J.; Crévisy, C.; Baslé, O.; de Figueiredo, R. M.; Halbert, S.; Gérard, H.; Mauduit, M.; Campagne, J.-M. *Adv. Synth. Catal.* **2016**, *358*, 2519-2540.
3. Drissi-Amraoui, S.; Morin, M. S. T.; Crévisy, C.; Baslé, O.; Marcia de Figueiredo, R.; Mauduit, M.; Campagne, J.-M. *Angew. Chem. Int. Ed.* **2015**, *54*, 11830-11834.
4. Drusan, M.; Rakovský, E.; Marek, J.; Šebesta, R. *Adv. Synth. Catal.* **2015**, *357*, 1493-1498.
5. Vargová, D.; Perez, J. M.; Harutyunyan, S. R.; Šebesta, R. *Chem. Commun.* **2019**, *55*, 11766-11769.
6. Mudráková, B.; Kisszékelyi, P.; Vargová, D.; Zakiewicz, D.; Šebesta, R. *Adv. Synth. Catal.* **2022**, *364*, 1337-1344.
7. Shao, Y.; Molnar, L. F.; Jung, Y.; Kussmann, J.; Ochsenfeld, C.; Brown, S. T.; Gilbert, A. T. B.; Slipchenko, L. V.; Levchenko, S. V.; O'Neill, D. P.; Jr, R. A. D.; Lochan, R. C.; Wang, T.; Beran, G. J. O.; Besley, N. A.; Herbert, J. M.; Lin, C. Y.; Voorhis, T. V.; Chien, S. H.; Sodt, A.; Steele, R. P.; Rassolov, V. A.; Maslen, P. E.; Korambath, P. P.; Adamson, R. D.; Austin, B.; Baker, J.; Byrd, E. F. C.; Dachsel, H.; Doerksen, R. J.; Dreuw, A.; Dunietz, B. D.; Dutoi, A. D.; Furlani, T. R.; Gwaltney, S. R.; Heyden, A.; Hirata, S.; Hsu, C.-P.; Kedziora, G.; Khalliulin, R. Z.; Klunzinger, P.; Lee, A. M.; Lee, M. S.; Liang, W.; Lotan, I.; Nair, N.; Peters, B.; Proynov, E. I.; Pieniazek, P. A.; Rhee, Y. M.; Ritchie, J.; Rosta, E.; Sherrill, C. D.; Simmonett, A. C.; Subotnik, J. E.; Woodcock III, H. L.; Zhang, W.; Bell, A. T.; Chakraborty, A. K. *Phys. Chem. Chem. Phys.* **2006**, *8*, 3172 - 3191.
8. TURBOMOLE V7.5, TURBOMOLE GmbH, Karlsruhe, 2019.
9. Balasubramani, S. G.; Chen, G. P.; Coriani, S.; Diedenhofen, M.; Frank, M. S.; Franzke, Y. J.; Furche, F.; Grotjahn, R.; Harding, M. E.; Hättig, C.; Hellweg, A.; Helmich-Paris, B.; Holzer, C.; Huniar, U.; Kaupp, M.; Marefat Khah, A.; Karbalaei Khani, S.; Müller, T.; Mack, F.; Nguyen, B. D.; Parker, S. M.; Perlt, E.; Rappoport, D.; Reiter, K.; Roy, S.; Rückert, M.; Schmitz, G.; Sierka, M.; Tapavicza, E.; Tew, D. P.; van Wüllen, C.; Voora, V. K.; Weigend, F.; Wodyński, A.; Yu, J. M. *J. Chem. Phys.* **2020**, *152*, 184107.
10. Becke, A. D. *J. Chem. Phys.* **1993**, *98*, 5648-5652.
11. Lee, C.; Yang, W.; R.G. Parr *Phys. Rev. B* **1988**, *37*, 785-789.

12. Vosko, S. H.; Wilk, L.; Nusair, M. *Can. J. Phys.* **1980**, *58*, 1200-1211.
13. Stephens, P. J.; Devlin, F. J.; Chabalowski, C. F.; Frisch, M. J. *J. Phys. Chem.* **1994**, *98*, 11623-11627.
14. Grimme, S.; Ehrlich, S.; Goerigk, L. *J. Comput. Chem.* **2011**, *32*, 1456-1465.
15. Grimme, S.; Brandenburg, J. G.; Bannwarth, C.; Hansen, A. *J. Chem. Phys.* **2015**, *143*, 054107.
16. Schäfer, A.; Horn, H.; Ahlrichs, R. *J. Chem. Phys.* **1992**, *97*, 2571-2577.
17. Zhao, Y.; Truhlar, D. *Theor. Chem. Acc.* **2008**, *120*, 215-241.
18. Zhao, Y.; Truhlar, D. G. *Theor. Chem. Acc.* **2008**, *120*, 215-241.
19. Weigend, F.; Ahlrichs, R. *Phys. Chem. Chem. Phys.* **2005**, *7*, 3297-3305.
20. Chai, J.-D.; Head-Gordon, M. *Phys. Chem. Chem. Phys.* **2008**, *10*, 6615-6620.
21. Yanai, T.; Tew, D. P.; Handy, N. C. *Chem. Phys. Lett.* **2004**, *393*, 51-57.
22. Brandenburg, J. G.; Bannwarth, C.; Hansen, A.; Grimme, S. *J. Chem. Phys.* **2018**, *148*, 064104.
23. Ernzerhof, M.; Scuseria, G. E. *J. Chem. Phys.* **1999**, *110*, 5029-5036.
24. Caldeweyher, E.; Ehlert, S.; Hansen, A.; Neugebauer, H.; Spicher, S.; Bannwarth, C.; Grimme, S. *J. Chem. Phys.* **2019**, *150*.
25. Kühn, M.; Weigend, F. *J. Chem. Theory Comput.* **2013**, *9*, 5341-5348.
26. Kühn, M.; Weigend, F. *J. Chem. Phys.* **2015**, *142*, 034116.
